# Supplementary material for: Variation in the ACE2 receptor has limited utility for SARS-CoV-2 host prediction
Source: bioRxiv preprint, doi:10.1101/2022.05.16.492068, version 2 (2022-10-13)
Supplement: Supplementary file 2 [file 492068_file04.xlsx]

## Sheet: (a) Training species
class	order	suborder	family	subfamily	species	probability	cutoff	prediction	observed
Mammalia	Cetacea	Odontoceti	Delphinidae		Orcinus orca	0.954048	0.76	True	True
Mammalia	Cetacea	Odontoceti	Phocoenidae		Neophocaena asiaeorientalis	0.95154	0.75	True	True
Mammalia	Cetacea	Odontoceti	Delphinidae		Globicephala melas	0.950869	0.64	True	True
Mammalia	Carnivora	Caniformia	Phocidae		Neomonachus schauinslandi	0.949934	0.75	True	True
Mammalia	Artiodactyla		Suidae	Suinae	Sus scrofa	0.949872	0.61	True	True
Mammalia	Carnivora	Caniformia	Otariidae		Zalophus californianus	0.946666	0.74	True	True
Mammalia	Carnivora	Caniformia	Canidae		Canis familiaris	0.945127	0.64	True	True
Mammalia	Carnivora	Caniformia	Otariidae		Eumetopias jubatus	0.938258	0.79	True	True
Mammalia	Chiroptera	Yinpterochiroptera	Hipposideridae		Hipposideros armiger	0.937189	0.73	True	False
Mammalia	Carnivora	Feliformia	Viverridae	Paradoxurinae	Paguma larvata	0.933038	0.72	True	True
Mammalia	Carnivora	Feliformia	Felidae	Pantherinae	Panthera pardus	0.928637	0.77	True	True
Mammalia	Carnivora	Feliformia	Felidae	Felinae	Lynx canadensis	0.927056	0.71	True	True
Mammalia	Artiodactyla		Bovidae	Caprinae	Ovis aries	0.913355	0.74	True	True
Mammalia	Rodentia	Myomorpha	Cricetidae	Sigmodontinae	Sigmodon hispidus	0.91134	0.73	True	False
Mammalia	Cetacea	Odontoceti	Physeteridae		Physeter catodon	0.905706	0.74	True	True
Mammalia	Cetacea	Odontoceti	Lipotidae		Lipotes vexillifer	0.905535	0.82	True	True
Mammalia	Rodentia	Myomorpha	Cricetidae	Cricetinae	Phodopus campbelli	0.905354	0.8	True	True
Mammalia	Carnivora	Caniformia	Mustelidae	Mustelinae	Mustela putorius	0.903928	0.75	True	True
Mammalia	Rodentia	Myomorpha	Cricetidae	Cricetinae	Cricetulus griseus	0.901122	0.77	True	True
Mammalia	Rodentia	Myomorpha	Cricetidae	Cricetinae	Phodopus sungorus	0.899478	0.66	True	True
Mammalia	Rodentia	Myomorpha	Cricetidae	Cricetinae	Mesocricetus auratus	0.898324	0.71	True	True
Mammalia	Cetacea	Odontoceti	Delphinidae		Tursiops truncatus	0.897168	0.75	True	True
Mammalia	Artiodactyla		Bovidae	Bovinae	Bubalus bubalis	0.896954	0.85	True	True
Mammalia	Carnivora	Caniformia	Mustelidae	Mustelinae	Mustela erminea	0.893762	0.71	True	True
Mammalia	Primates	Haplorrhini	Cercopithecidae	Cercopithecinae	Macaca fascicularis	0.893156	0.78	True	True
Mammalia	Carnivora	Caniformia	Mustelidae	Mustelinae	Neovison vison	0.888686	0.72	True	True
Mammalia	Primates	Haplorrhini	Cercopithecidae	Cercopithecinae	Papio anubis	0.887381	0.73	True	True
Mammalia	Primates	Haplorrhini	Cercopithecidae	Cercopithecinae	Chlorocebus sabaeus	0.887158	0.86	True	True
Mammalia	Artiodactyla		Bovidae	Bovinae	Bos mutus	0.886315	0.71	True	True
Mammalia	Primates	Haplorrhini	Cercopithecidae	Colobinae	Piliocolobus tephrosceles	0.885615	0.82	True	True
Mammalia	Carnivora	Caniformia	Canidae		Nyctereutes procyonoides	0.876824	0.78	True	True
Mammalia	Chiroptera	Yinpterochiroptera	Rhinolophidae		Rhinolophus cornutus	0.876666	0.78	True	True
Mammalia	Chiroptera	Yinpterochiroptera	Rhinolophidae		Rhinolophus thomasi	0.874428	0.73	True	True
Mammalia	Carnivora	Feliformia	Felidae	Pantherinae	Panthera leo	0.874207	0.66	True	True
Mammalia	Primates	Haplorrhini	Cercopithecidae	Colobinae	Rhinopithecus roxellana	0.871887	0.76	True	True
Mammalia	Chiroptera	Yinpterochiroptera	Rhinolophidae		Rhinolophus sinicus	0.8706	0.78	True	True
Mammalia	Rodentia	Myomorpha	Cricetidae	Neotominae	Neotoma cinerea	0.866181	0.82	True	True
Mammalia	Primates	Haplorrhini	Hominidae	Homininae	Pan troglodytes	0.863662	0.79	True	True
Mammalia	Primates	Haplorrhini	Cercopithecidae	Cercopithecinae	Macaca mulatta	0.861963	0.84	True	True
Mammalia	Chiroptera	Yinpterochiroptera	Rhinolophidae		Rhinolophus affinis	0.859047	0.78	True	True
Mammalia	Chiroptera	Yinpterochiroptera	Rhinolophidae		Rhinolophus pusillus	0.856217	0.75	True	True
Mammalia	Rodentia	Myomorpha	Cricetidae	Sigmodontinae	Sigmodon fulviventer	0.850981	0.77	True	True
Mammalia	Primates	Haplorrhini	Hylobatidae		Nomascus leucogenys	0.840582	0.69	True	True
Mammalia	Chiroptera	Yinpterochiroptera	Rhinolophidae		Rhinolophus monoceros	0.839096	0.83	True	True
Mammalia	Chiroptera	Yinpterochiroptera	Rhinolophidae		Rhinolophus shameli	0.835995	0.77	True	True
Mammalia	Chiroptera	Yinpterochiroptera	Rhinolophidae		Rhinolophus ferrumequinum	0.834821	0.74	True	True
Mammalia	Chiroptera	Yinpterochiroptera	Rhinolophidae		Rhinolophus macrotis	0.833925	0.58	True	True
Mammalia	Primates	Haplorrhini	Hominidae	Homininae	Gorilla gorilla	0.826673	0.76	True	True
Mammalia	Pholidota		Manidae		Manis javanica	0.823349	0.78	True	True
Mammalia	Perissodactyla		Equidae		Equus caballus	0.820415	0.84	False	True
Mammalia	Chiroptera	Yinpterochiroptera	Rhinolophidae		Rhinolophus pearsonii	0.818368	0.75	True	True
Mammalia	Primates	Haplorrhini	Hominidae	Ponginae	Pongo abelii	0.810533	0.76	True	True
Mammalia	Chiroptera	Yinpterochiroptera	Hipposideridae		Aselliscus stoliczkanus	0.79305	0.75	True	True
Mammalia	Rodentia	Myomorpha	Cricetidae	Neotominae	Peromyscus maniculatus	0.753155	0.77	False	True
Mammalia	Chiroptera	Yangochiroptera	Molossidae	Molossinae	Chaerephon plicatus	0.751436	0.77	False	True
Mammalia	Primates	Haplorrhini	Cebidae	Cebinae	Sapajus apella	0.709003	0.78	False	False
Mammalia	Scandentia		Tupaiidae		Tupaia belangeri	0.699071	0.7	False	True
Mammalia	Carnivora	Caniformia	Ursidae		Ailuropoda melanoleuca	0.694476	0.58	True	True
Mammalia	Chiroptera	Yangochiroptera	Vespertilionidae	Vespertilioninae	Eptesicus fuscus	0.694463	0.7	False	False
Mammalia	Rodentia	Sciuromorpha	Sciuridae	Sciurinae	Sciurus niger	0.694344	0.77	False	False
Mammalia	Carnivora	Caniformia	Ursidae		Ursus arctos	0.693321	0.57	True	True
Mammalia	Chiroptera	Yinpterochiroptera	Pteropodidae	Rousettinae	Rousettus leschenaultii	0.692131	0.73	False	False
Mammalia	Carnivora	Feliformia	Felidae	Felinae	Felis catus	0.679917	0.54	True	True
Mammalia	Rodentia	Myomorpha	Cricetidae	Cricetinae	Phodopus roborovskii	0.678578	0.71	False	True
Mammalia	Carnivora	Feliformia	Felidae	Felinae	Puma concolor	0.67344	0.6	True	True
Mammalia	Artiodactyla		Bovidae	Bovinae	Bos taurus	0.665302	0.57	True	True
Mammalia	Artiodactyla		Bovidae	Caprinae	Capra hircus	0.662832	0.58	True	True
Mammalia	Cetacea	Odontoceti	Monodontidae		Delphinapterus leucas	0.660338	0.59	True	True
Mammalia	Chiroptera	Yangochiroptera	Vespertilionidae	Myotinae	Myotis davidii	0.654545	0.75	False	False
Mammalia	Chiroptera	Yinpterochiroptera	Pteropodidae	Pteropodinae	Pteropus alecto	0.643696	0.78	False	False
Mammalia	Carnivora	Caniformia	Canidae		Vulpes vulpes	0.616958	0.56	True	True
Mammalia	Primates	Haplorrhini	Cercopithecidae	Cercopithecinae	Theropithecus gelada	0.601532	0.56	True	True
Mammalia	Lagomorpha		Leporidae		Oryctolagus cuniculus	0.590149	0.56	True	True
Mammalia	Primates	Haplorrhini	Hominidae	Homininae	Homo sapiens	0.570705	0.54	True	True
Mammalia	Rodentia	Myomorpha	Muridae	Murinae	Mus musculus	0.558686	0.53	True	False
Mammalia	Chiroptera	Yinpterochiroptera	Pteropodidae	Rousettinae	Rousettus aegyptiacus	0.55804	0.77	False	True
Mammalia	Rodentia	Sciuromorpha	Sciuridae	Xerinae	Cynomys ludovicianus	0.54756	0.7	False	False
Mammalia	Rodentia	Myomorpha	Cricetidae	Neotominae	Peromyscus leucopus	0.53824	0.52	True	True
Mammalia	Carnivora	Feliformia	Felidae	Pantherinae	Panthera tigris	0.537101	0.52	True	True
Mammalia	Rodentia	Sciuromorpha	Sciuridae	Xerinae	Urocitellus elegans	0.536863	0.72	False	False
Mammalia	Rodentia	Myomorpha	Muridae	Murinae	Rattus losea	0.52299	0.76	False	True
Mammalia	Perissodactyla		Rhinocerotidae		Ceratotherium simum	0.519657	0.53	False	True
Mammalia	Diprotodontia	Vombatiformes	Phascolarctidae		Phascolarctos cinereus	0.512626	0.52	False	False
Mammalia	Chiroptera	Yangochiroptera	Vespertilionidae	Myotinae	Myotis chinensis	0.512569	0.54	False	False
Mammalia	Primates	Haplorrhini	Callitrichidae		Callithrix jacchus	0.509576	0.51	False	True
Mammalia	Primates	Haplorrhini	Callitrichidae		Saguinus mystax	0.508121	0.73	False	False
Aves	Galliformes		Phasianidae	Phasianinae	Gallus gallus	0.505393	0.53	False	False
Mammalia	Rodentia	Myomorpha	Dipodidae	Dipodinae	Jaculus jaculus	0.493782	0.53	False	True
Mammalia	Primates	Haplorrhini	Cebidae	Saimiriinae	Saimiri boliviensis	0.493578	0.78	False	False
Mammalia	Primates	Haplorrhini	Cebidae	Saimiriinae	Saimiri sciureus	0.487082	0.81	False	False
Aves	Anseriformes		Anatidae	Anserinae	Anser anser	0.381024	0.64	False	True
Aves	Anseriformes		Anatidae	Anserinae	Anser cygnoides	0.370115	0.69	False	False
Mammalia	Rodentia	Sciuromorpha	Sciuridae	Xerinae	Ictidomys tridecemlineatus	0.323442	0.67	False	True
Aves	Anseriformes		Anatidae	Anatinae	Anas platyrhynchos	0.321235	0.76	False	False
Aves	Galliformes		Phasianidae	Meleagridinae	Meleagris gallopavo	0.316715	0.78	False	False
Aves	Galliformes		Phasianidae	Perdicinae	Coturnix japonica	0.266526	0.7	False	False

## Sheet: (b) Recently infected
class	order	suborder	family	subfamily	species	probability	cutoff	prediction	observed
Mammalia	Carnivora	Feliformia	Viverridae	Paradoxurinae	Arctictis binturong	0.936862	0.76	True	True
Mammalia	Carnivora	Feliformia	Hyaenidae		Crocuta crocuta	0.936862	0.76	True	True
Mammalia	Carnivora	Feliformia	Felidae	Felinae	Lynx lynx	0.936862	0.76	True	True
Mammalia	Carnivora	Feliformia	Felidae	Pantherinae	Panthera uncia	0.936862	0.76	True	True
Mammalia	Carnivora	Feliformia	Felidae	Felinae	Prionailurus viverrinus	0.936862	0.76	True	True
Mammalia	Artiodactyla		Cervidae	Capreolinae	Odocoileus hemionus	0.913951	0.76	True	True
Mammalia	Artiodactyla		Cervidae	Capreolinae	Odocoileus virginianus	0.913951	0.76	True	True
Mammalia	Carnivora	Caniformia	Mustelidae	Lutrinae	Aonyx cinerea	0.913408	0.76	True	True
Mammalia	Carnivora	Caniformia	Mustelidae	Lutrinae	Lutra lutra	0.913408	0.76	True	True
Mammalia	Carnivora	Caniformia	Procyonidae		Nasua nasua	0.913408	0.76	True	True
Mammalia	Primates	Haplorrhini	Cercopithecidae	Cercopithecinae	Mandrillus sphinx	0.897416	0.76	True	True
Mammalia	Primates	Haplorrhini	Callitrichidae		Callithrix melanura	0.434445	0.76	False	True

## Sheet: (c) Other (mammals)
class	order	suborder	family	subfamily	species	probability	cutoff	prediction
Mammalia	Cetacea	Mysticeti	Balaenidae		Balaena mysticetus	0.957583	0.76	True
Mammalia	Cetacea	Mysticeti	Balaenopteridae		Balaenoptera acutorostrata	0.957583	0.76	True
Mammalia	Cetacea	Mysticeti	Balaenopteridae		Balaenoptera bonaerensis	0.957583	0.76	True
Mammalia	Cetacea	Mysticeti	Balaenopteridae		Balaenoptera borealis	0.957583	0.76	True
Mammalia	Cetacea	Mysticeti	Balaenopteridae		Balaenoptera brydei	0.957583	0.76	True
Mammalia	Cetacea	Mysticeti	Balaenopteridae		Balaenoptera edeni	0.957583	0.76	True
Mammalia	Cetacea	Mysticeti	Balaenopteridae		Balaenoptera musculus	0.957583	0.76	True
Mammalia	Cetacea	Mysticeti	Balaenopteridae		Balaenoptera omurai	0.957583	0.76	True
Mammalia	Cetacea	Mysticeti	Balaenopteridae		Balaenoptera physalus	0.957583	0.76	True
Mammalia	Cetacea	Odontoceti	Hyperoodontidae		Berardius arnuxii	0.957583	0.76	True
Mammalia	Cetacea	Odontoceti	Hyperoodontidae		Berardius bairdii	0.957583	0.76	True
Mammalia	Cetacea	Mysticeti	Neobalaenidae		Caperea marginata	0.957583	0.76	True
Mammalia	Cetacea	Odontoceti	Delphinidae		Cephalorhynchus commersonii	0.957583	0.76	True
Mammalia	Cetacea	Odontoceti	Delphinidae		Cephalorhynchus eutropia	0.957583	0.76	True
Mammalia	Cetacea	Odontoceti	Delphinidae		Cephalorhynchus heavisidii	0.957583	0.76	True
Mammalia	Cetacea	Odontoceti	Delphinidae		Cephalorhynchus hectori	0.957583	0.76	True
Mammalia	Cetacea	Mysticeti	Eschrichtiidae		Eschrichtius robustus	0.957583	0.76	True
Mammalia	Cetacea	Mysticeti	Balaenidae		Eubalaena australis	0.957583	0.76	True
Mammalia	Cetacea	Mysticeti	Balaenidae		Eubalaena glacialis	0.957583	0.76	True
Mammalia	Cetacea	Mysticeti	Balaenidae		Eubalaena japonica	0.957583	0.76	True
Mammalia	Cetacea	Odontoceti	Delphinidae		Feresa attenuata	0.957583	0.76	True
Mammalia	Cetacea	Odontoceti	Delphinidae		Globicephala macrorhynchus	0.957583	0.76	True
Mammalia	Cetacea	Odontoceti	Delphinidae		Grampus griseus	0.957583	0.76	True
Mammalia	Cetacea	Odontoceti	Hyperoodontidae		Hyperoodon ampullatus	0.957583	0.76	True
Mammalia	Cetacea	Odontoceti	Hyperoodontidae		Hyperoodon planifrons	0.957583	0.76	True
Mammalia	Cetacea	Odontoceti	Hyperoodontidae		Indopacetus pacificus	0.957583	0.76	True
Mammalia	Cetacea	Odontoceti	Iniidae		Inia geoffrensis	0.957583	0.76	True
Mammalia	Cetacea	Odontoceti	Kogiidae		Kogia breviceps	0.957583	0.76	True
Mammalia	Cetacea	Odontoceti	Kogiidae		Kogia sima	0.957583	0.76	True
Mammalia	Cetacea	Odontoceti	Delphinidae		Lagenodelphis hosei	0.957583	0.76	True
Mammalia	Cetacea	Odontoceti	Delphinidae		Lagenorhynchus acutus	0.957583	0.76	True
Mammalia	Cetacea	Odontoceti	Delphinidae		Lagenorhynchus albirostris	0.957583	0.76	True
Mammalia	Cetacea	Odontoceti	Delphinidae		Lagenorhynchus australis	0.957583	0.76	True
Mammalia	Cetacea	Odontoceti	Delphinidae		Lagenorhynchus cruciger	0.957583	0.76	True
Mammalia	Cetacea	Odontoceti	Delphinidae		Lagenorhynchus obliquidens	0.957583	0.76	True
Mammalia	Cetacea	Odontoceti	Delphinidae		Lagenorhynchus obscurus	0.957583	0.76	True
Mammalia	Cetacea	Odontoceti	Delphinidae		Lissodelphis borealis	0.957583	0.76	True
Mammalia	Cetacea	Odontoceti	Delphinidae		Lissodelphis peronii	0.957583	0.76	True
Mammalia	Cetacea	Mysticeti	Balaenopteridae		Megaptera novaeangliae	0.957583	0.76	True
Mammalia	Cetacea	Odontoceti	Hyperoodontidae		Mesoplodon bidens	0.957583	0.76	True
Mammalia	Cetacea	Odontoceti	Hyperoodontidae		Mesoplodon bowdoini	0.957583	0.76	True
Mammalia	Cetacea	Odontoceti	Hyperoodontidae		Mesoplodon carlhubbsi	0.957583	0.76	True
Mammalia	Cetacea	Odontoceti	Hyperoodontidae		Mesoplodon densirostris	0.957583	0.76	True
Mammalia	Cetacea	Odontoceti	Hyperoodontidae		Mesoplodon europaeus	0.957583	0.76	True
Mammalia	Cetacea	Odontoceti	Hyperoodontidae		Mesoplodon ginkgodens	0.957583	0.76	True
Mammalia	Cetacea	Odontoceti	Hyperoodontidae		Mesoplodon grayi	0.957583	0.76	True
Mammalia	Cetacea	Odontoceti	Hyperoodontidae		Mesoplodon hectori	0.957583	0.76	True
Mammalia	Cetacea	Odontoceti	Hyperoodontidae		Mesoplodon layardii	0.957583	0.76	True
Mammalia	Cetacea	Odontoceti	Hyperoodontidae		Mesoplodon mirus	0.957583	0.76	True
Mammalia	Cetacea	Odontoceti	Hyperoodontidae		Mesoplodon perrini	0.957583	0.76	True
Mammalia	Cetacea	Odontoceti	Hyperoodontidae		Mesoplodon peruvianus	0.957583	0.76	True
Mammalia	Cetacea	Odontoceti	Hyperoodontidae		Mesoplodon stejnegeri	0.957583	0.76	True
Mammalia	Cetacea	Odontoceti	Hyperoodontidae		Mesoplodon traversii	0.957583	0.76	True
Mammalia	Cetacea	Odontoceti	Monodontidae		Monodon monoceros	0.957583	0.76	True
Mammalia	Cetacea	Odontoceti	Delphinidae		Orcaella brevirostris	0.957583	0.76	True
Mammalia	Cetacea	Odontoceti	Delphinidae		Orcaella heinsohni	0.957583	0.76	True
Mammalia	Cetacea	Odontoceti	Delphinidae		Peponocephala electra	0.957583	0.76	True
Mammalia	Cetacea	Odontoceti	Phocoenidae		Phocoena dioptrica	0.957583	0.76	True
Mammalia	Cetacea	Odontoceti	Phocoenidae		Phocoena phocoena	0.957583	0.76	True
Mammalia	Cetacea	Odontoceti	Phocoenidae		Phocoena sinus	0.957583	0.76	True
Mammalia	Cetacea	Odontoceti	Phocoenidae		Phocoena spinipinnis	0.957583	0.76	True
Mammalia	Cetacea	Odontoceti	Phocoenidae		Phocoenoides dalli	0.957583	0.76	True
Mammalia	Cetacea	Odontoceti	Platanistidae		Platanista gangetica	0.957583	0.76	True
Mammalia	Cetacea	Odontoceti	Platanistidae		Platanista minor	0.957583	0.76	True
Mammalia	Cetacea	Odontoceti	Pontoporiidae		Pontoporia blainvillei	0.957583	0.76	True
Mammalia	Cetacea	Odontoceti	Delphinidae		Pseudorca crassidens	0.957583	0.76	True
Mammalia	Cetacea	Odontoceti	Delphinidae		Sotalia fluviatilis	0.957583	0.76	True
Mammalia	Cetacea	Odontoceti	Delphinidae		Sotalia guianensis	0.957583	0.76	True
Mammalia	Cetacea	Odontoceti	Delphinidae		Steno bredanensis	0.957583	0.76	True
Mammalia	Cetacea	Odontoceti	Hyperoodontidae		Tasmacetus shepherdi	0.957583	0.76	True
Mammalia	Cetacea	Odontoceti	Hyperoodontidae		Ziphius cavirostris	0.957583	0.76	True
Mammalia	Cetacea	Odontoceti	Delphinidae		Delphinus capensis	0.956298	0.76	True
Mammalia	Cetacea	Odontoceti	Delphinidae		Delphinus delphis	0.956298	0.76	True
Mammalia	Cetacea	Odontoceti	Delphinidae		Delphinus tropicalis	0.956298	0.76	True
Mammalia	Cetacea	Odontoceti	Delphinidae		Sousa chinensis	0.956298	0.76	True
Mammalia	Cetacea	Odontoceti	Delphinidae		Sousa teuszii	0.956298	0.76	True
Mammalia	Cetacea	Odontoceti	Delphinidae		Stenella attenuata	0.956298	0.76	True
Mammalia	Cetacea	Odontoceti	Delphinidae		Stenella clymene	0.956298	0.76	True
Mammalia	Cetacea	Odontoceti	Delphinidae		Stenella coeruleoalba	0.956298	0.76	True
Mammalia	Cetacea	Odontoceti	Delphinidae		Stenella frontalis	0.956298	0.76	True
Mammalia	Cetacea	Odontoceti	Delphinidae		Stenella longirostris	0.956298	0.76	True
Mammalia	Cetacea	Odontoceti	Delphinidae		Tursiops aduncus	0.956298	0.76	True
Mammalia	Carnivora	Caniformia	Canidae		Chrysocyon brachyurus	0.950672	0.76	True
Mammalia	Carnivora	Caniformia	Canidae		Cuon alpinus	0.950672	0.76	True
Mammalia	Carnivora	Caniformia	Canidae		Dusicyon australis	0.950672	0.76	True
Mammalia	Carnivora	Caniformia	Canidae		Dusicyon avus	0.950672	0.76	True
Mammalia	Carnivora	Caniformia	Canidae		Lycaon pictus	0.950672	0.76	True
Mammalia	Carnivora	Caniformia	Canidae		Otocyon megalotis	0.950672	0.76	True
Mammalia	Carnivora	Caniformia	Canidae		Speothos venaticus	0.950672	0.76	True
Mammalia	Carnivora	Caniformia	Canidae		Urocyon cinereoargenteus	0.950672	0.76	True
Mammalia	Carnivora	Caniformia	Canidae		Urocyon littoralis	0.950672	0.76	True
Mammalia	Carnivora	Caniformia	Canidae		Vulpes cana	0.950672	0.76	True
Mammalia	Carnivora	Caniformia	Canidae		Vulpes chama	0.950672	0.76	True
Mammalia	Carnivora	Caniformia	Canidae		Vulpes corsac	0.950672	0.76	True
Mammalia	Carnivora	Caniformia	Canidae		Vulpes ferrilata	0.950672	0.76	True
Mammalia	Carnivora	Caniformia	Canidae		Vulpes lagopus	0.950672	0.76	True
Mammalia	Carnivora	Caniformia	Canidae		Vulpes macrotis	0.950672	0.76	True
Mammalia	Carnivora	Caniformia	Canidae		Vulpes rueppellii	0.950672	0.76	True
Mammalia	Carnivora	Caniformia	Canidae		Vulpes velox	0.950672	0.76	True
Mammalia	Carnivora	Caniformia	Canidae		Vulpes zerda	0.950672	0.76	True
Mammalia	Carnivora	Caniformia	Ailuridae		Ailurus fulgens	0.949006	0.76	True
Mammalia	Carnivora	Caniformia	Otariidae		Arctocephalus australis	0.949006	0.76	True
Mammalia	Carnivora	Caniformia	Otariidae		Arctocephalus forsteri	0.949006	0.76	True
Mammalia	Carnivora	Caniformia	Otariidae		Arctocephalus galapagoensis	0.949006	0.76	True
Mammalia	Carnivora	Caniformia	Otariidae		Arctocephalus gazella	0.949006	0.76	True
Mammalia	Carnivora	Caniformia	Otariidae		Arctocephalus philippii	0.949006	0.76	True
Mammalia	Carnivora	Caniformia	Otariidae		Arctocephalus pusillus	0.949006	0.76	True
Mammalia	Carnivora	Caniformia	Otariidae		Arctocephalus townsendi	0.949006	0.76	True
Mammalia	Carnivora	Caniformia	Otariidae		Arctocephalus tropicalis	0.949006	0.76	True
Mammalia	Carnivora	Caniformia	Ursidae		Arctodus simus	0.949006	0.76	True
Mammalia	Carnivora	Caniformia	Canidae		Atelocynus microtis	0.949006	0.76	True
Mammalia	Carnivora	Caniformia	Otariidae		Callorhinus ursinus	0.949006	0.76	True
Mammalia	Carnivora	Caniformia	Canidae		Canis adustus	0.949006	0.76	True
Mammalia	Carnivora	Caniformia	Canidae		Canis anthus	0.949006	0.76	True
Mammalia	Carnivora	Caniformia	Canidae		Canis aureus	0.949006	0.76	True
Mammalia	Carnivora	Caniformia	Canidae		Canis latrans	0.949006	0.76	True
Mammalia	Carnivora	Caniformia	Canidae		Canis mesomelas	0.949006	0.76	True
Mammalia	Carnivora	Caniformia	Canidae		Canis simensis	0.949006	0.76	True
Mammalia	Carnivora	Caniformia	Canidae		Cerdocyon thous	0.949006	0.76	True
Mammalia	Carnivora	Caniformia	Mephitidae		Conepatus chinga	0.949006	0.76	True
Mammalia	Carnivora	Caniformia	Mephitidae		Conepatus leuconotus	0.949006	0.76	True
Mammalia	Carnivora	Caniformia	Mephitidae		Conepatus semistriatus	0.949006	0.76	True
Mammalia	Carnivora	Caniformia	Phocidae		Cystophora cristata	0.949006	0.76	True
Mammalia	Carnivora	Caniformia	Phocidae		Erignathus barbatus	0.949006	0.76	True
Mammalia	Carnivora	Caniformia	Phocidae		Halichoerus grypus	0.949006	0.76	True
Mammalia	Carnivora	Caniformia	Ursidae		Helarctos malayanus	0.949006	0.76	True
Mammalia	Carnivora	Caniformia	Phocidae		Hydrurga leptonyx	0.949006	0.76	True
Mammalia	Carnivora	Caniformia	Phocidae		Leptonychotes weddellii	0.949006	0.76	True
Mammalia	Carnivora	Caniformia	Phocidae		Lobodon carcinophaga	0.949006	0.76	True
Mammalia	Carnivora	Caniformia	Canidae		Lycalopex culpaeus	0.949006	0.76	True
Mammalia	Carnivora	Caniformia	Canidae		Lycalopex fulvipes	0.949006	0.76	True
Mammalia	Carnivora	Caniformia	Canidae		Lycalopex griseus	0.949006	0.76	True
Mammalia	Carnivora	Caniformia	Canidae		Lycalopex gymnocercus	0.949006	0.76	True
Mammalia	Carnivora	Caniformia	Canidae		Lycalopex sechurae	0.949006	0.76	True
Mammalia	Carnivora	Caniformia	Canidae		Lycalopex vetulus	0.949006	0.76	True
Mammalia	Carnivora	Caniformia	Ursidae		Melursus ursinus	0.949006	0.76	True
Mammalia	Carnivora	Caniformia	Mephitidae		Mephitis macroura	0.949006	0.76	True
Mammalia	Carnivora	Caniformia	Mephitidae		Mephitis mephitis	0.949006	0.76	True
Mammalia	Carnivora	Caniformia	Phocidae		Mirounga angustirostris	0.949006	0.76	True
Mammalia	Carnivora	Caniformia	Phocidae		Mirounga leonina	0.949006	0.76	True
Mammalia	Carnivora	Caniformia	Phocidae		Monachus monachus	0.949006	0.76	True
Mammalia	Carnivora	Caniformia	Mephitidae		Mydaus javanensis	0.949006	0.76	True
Mammalia	Carnivora	Caniformia	Mephitidae		Mydaus marchei	0.949006	0.76	True
Mammalia	Carnivora	Caniformia	Otariidae		Neophoca cinerea	0.949006	0.76	True
Mammalia	Carnivora	Caniformia	Odobenidae		Odobenus rosmarus	0.949006	0.76	True
Mammalia	Carnivora	Caniformia	Phocidae		Ommatophoca rossii	0.949006	0.76	True
Mammalia	Carnivora	Caniformia	Otariidae		Otaria byronia	0.949006	0.76	True
Mammalia	Carnivora	Caniformia	Phocidae		Phoca fasciata	0.949006	0.76	True
Mammalia	Carnivora	Caniformia	Phocidae		Phoca groenlandica	0.949006	0.76	True
Mammalia	Carnivora	Caniformia	Phocidae		Phoca largha	0.949006	0.76	True
Mammalia	Carnivora	Caniformia	Phocidae		Phoca vitulina	0.949006	0.76	True
Mammalia	Carnivora	Caniformia	Otariidae		Phocarctos hookeri	0.949006	0.76	True
Mammalia	Carnivora	Caniformia	Phocidae		Pusa caspica	0.949006	0.76	True
Mammalia	Carnivora	Caniformia	Phocidae		Pusa hispida	0.949006	0.76	True
Mammalia	Carnivora	Caniformia	Phocidae		Pusa sibirica	0.949006	0.76	True
Mammalia	Carnivora	Caniformia	Mephitidae		Spilogale gracilis	0.949006	0.76	True
Mammalia	Carnivora	Caniformia	Mephitidae		Spilogale putorius	0.949006	0.76	True
Mammalia	Carnivora	Caniformia	Ursidae		Tremarctos ornatus	0.949006	0.76	True
Mammalia	Carnivora	Caniformia	Ursidae		Ursus americanus	0.949006	0.76	True
Mammalia	Carnivora	Caniformia	Ursidae		Ursus deningeri	0.949006	0.76	True
Mammalia	Carnivora	Caniformia	Ursidae		Ursus ingressus	0.949006	0.76	True
Mammalia	Carnivora	Caniformia	Ursidae		Ursus maritimus	0.949006	0.76	True
Mammalia	Carnivora	Caniformia	Ursidae		Ursus thibetanus	0.949006	0.76	True
Mammalia	Carnivora	Caniformia	Otariidae		Zalophus japonicus	0.949006	0.76	True
Mammalia	Carnivora	Caniformia	Otariidae		Zalophus wollebaeki	0.949006	0.76	True
Mammalia	Artiodactyla		Suidae	Suinae	Babyrousa babyrussa	0.947641	0.76	True
Mammalia	Artiodactyla		Camelidae		Camelus bactrianus	0.947641	0.76	True
Mammalia	Artiodactyla		Camelidae		Camelus dromedarius	0.947641	0.76	True
Mammalia	Artiodactyla		Camelidae		Camelus ferus	0.947641	0.76	True
Mammalia	Artiodactyla		Tayassuidae		Catagonus wagneri	0.947641	0.76	True
Mammalia	Artiodactyla		Suidae	Suinae	Hylochoerus meinertzhageni	0.947641	0.76	True
Mammalia	Artiodactyla		Camelidae		Lama glama	0.947641	0.76	True
Mammalia	Artiodactyla		Camelidae		Lama guanicoe	0.947641	0.76	True
Mammalia	Artiodactyla		Tayassuidae		Pecari tajacu	0.947641	0.76	True
Mammalia	Artiodactyla		Suidae	Suinae	Phacochoerus aethiopicus	0.947641	0.76	True
Mammalia	Artiodactyla		Suidae	Suinae	Phacochoerus africanus	0.947641	0.76	True
Mammalia	Artiodactyla		Suidae	Suinae	Potamochoerus larvatus	0.947641	0.76	True
Mammalia	Artiodactyla		Suidae	Suinae	Potamochoerus porcus	0.947641	0.76	True
Mammalia	Artiodactyla		Suidae	Suinae	Sus barbatus	0.947641	0.76	True
Mammalia	Artiodactyla		Suidae	Suinae	Sus bucculentus	0.947641	0.76	True
Mammalia	Artiodactyla		Suidae	Suinae	Sus cebifrons	0.947641	0.76	True
Mammalia	Artiodactyla		Suidae	Suinae	Sus celebensis	0.947641	0.76	True
Mammalia	Artiodactyla		Suidae	Suinae	Sus philippensis	0.947641	0.76	True
Mammalia	Artiodactyla		Suidae	Suinae	Sus salvanius	0.947641	0.76	True
Mammalia	Artiodactyla		Suidae	Suinae	Sus verrucosus	0.947641	0.76	True
Mammalia	Artiodactyla		Tayassuidae		Tayassu pecari	0.947641	0.76	True
Mammalia	Artiodactyla		Camelidae		Vicugna pacos	0.947641	0.76	True
Mammalia	Artiodactyla		Camelidae		Vicugna vicugna	0.947641	0.76	True
Mammalia	Primates	Strepsirrhini	Cheirogaleidae		Allocebus trichotis	0.937175	0.76	True
Mammalia	Primates	Strepsirrhini	Lorisidae	Perodicticinae	Arctocebus aureus	0.937175	0.76	True
Mammalia	Primates	Strepsirrhini	Lorisidae	Perodicticinae	Arctocebus calabarensis	0.937175	0.76	True
Mammalia	Primates	Strepsirrhini	Indriidae		Avahi cleesei	0.937175	0.76	True
Mammalia	Primates	Strepsirrhini	Indriidae		Avahi laniger	0.937175	0.76	True
Mammalia	Primates	Strepsirrhini	Indriidae		Avahi occidentalis	0.937175	0.76	True
Mammalia	Primates	Strepsirrhini	Indriidae		Avahi peyrierasi	0.937175	0.76	True
Mammalia	Primates	Strepsirrhini	Indriidae		Avahi unicolor	0.937175	0.76	True
Mammalia	Primates	Strepsirrhini	Cheirogaleidae		Cheirogaleus crossleyi	0.937175	0.76	True
Mammalia	Primates	Strepsirrhini	Cheirogaleidae		Cheirogaleus major	0.937175	0.76	True
Mammalia	Primates	Strepsirrhini	Cheirogaleidae		Cheirogaleus medius	0.937175	0.76	True
Mammalia	Primates	Strepsirrhini	Cheirogaleidae		Cheirogaleus sibreei	0.937175	0.76	True
Mammalia	Primates	Strepsirrhini	Daubentoniidae		Daubentonia madagascariensis	0.937175	0.76	True
Mammalia	Primates	Strepsirrhini	Lemuridae		Eulemur albifrons	0.937175	0.76	True
Mammalia	Primates	Strepsirrhini	Lemuridae		Eulemur cinereiceps	0.937175	0.76	True
Mammalia	Primates	Strepsirrhini	Lemuridae		Eulemur coronatus	0.937175	0.76	True
Mammalia	Primates	Strepsirrhini	Lemuridae		Eulemur flavifrons	0.937175	0.76	True
Mammalia	Primates	Strepsirrhini	Lemuridae		Eulemur fulvus	0.937175	0.76	True
Mammalia	Primates	Strepsirrhini	Lemuridae		Eulemur macaco	0.937175	0.76	True
Mammalia	Primates	Strepsirrhini	Lemuridae		Eulemur mongoz	0.937175	0.76	True
Mammalia	Primates	Strepsirrhini	Lemuridae		Eulemur rubriventer	0.937175	0.76	True
Mammalia	Primates	Strepsirrhini	Lemuridae		Eulemur rufifrons	0.937175	0.76	True
Mammalia	Primates	Strepsirrhini	Lemuridae		Eulemur rufus	0.937175	0.76	True
Mammalia	Primates	Strepsirrhini	Lemuridae		Eulemur sanfordi	0.937175	0.76	True
Mammalia	Primates	Strepsirrhini	Galagidae		Euoticus elegantulus	0.937175	0.76	True
Mammalia	Primates	Strepsirrhini	Galagidae		Galago alleni	0.937175	0.76	True
Mammalia	Primates	Strepsirrhini	Galagidae		Galago gabonensis	0.937175	0.76	True
Mammalia	Primates	Strepsirrhini	Galagidae		Galago gallarum	0.937175	0.76	True
Mammalia	Primates	Strepsirrhini	Galagidae		Galago granti	0.937175	0.76	True
Mammalia	Primates	Strepsirrhini	Galagidae		Galago matschiei	0.937175	0.76	True
Mammalia	Primates	Strepsirrhini	Galagidae		Galago moholi	0.937175	0.76	True
Mammalia	Primates	Strepsirrhini	Galagidae		Galago senegalensis	0.937175	0.76	True
Mammalia	Primates	Strepsirrhini	Galagidae		Galagoides cocos	0.937175	0.76	True
Mammalia	Primates	Strepsirrhini	Galagidae		Galagoides demidoff	0.937175	0.76	True
Mammalia	Primates	Strepsirrhini	Galagidae		Galagoides orinus	0.937175	0.76	True
Mammalia	Primates	Strepsirrhini	Galagidae		Galagoides rondoensis	0.937175	0.76	True
Mammalia	Primates	Strepsirrhini	Galagidae		Galagoides thomasi	0.937175	0.76	True
Mammalia	Primates	Strepsirrhini	Galagidae		Galagoides zanzibaricus	0.937175	0.76	True
Mammalia	Primates	Strepsirrhini	Indriidae		Hadropithecus stenognathus	0.937175	0.76	True
Mammalia	Primates	Strepsirrhini	Lemuridae		Hapalemur aureus	0.937175	0.76	True
Mammalia	Primates	Strepsirrhini	Lemuridae		Hapalemur griseus	0.937175	0.76	True
Mammalia	Primates	Strepsirrhini	Lemuridae		Hapalemur occidentalis	0.937175	0.76	True
Mammalia	Primates	Strepsirrhini	Indriidae		Indri indri	0.937175	0.76	True
Mammalia	Primates	Strepsirrhini	Lemuridae		Lemur catta	0.937175	0.76	True
Mammalia	Primates	Strepsirrhini	Lepilemuridae		Lepilemur aeeclis	0.937175	0.76	True
Mammalia	Primates	Strepsirrhini	Lepilemuridae		Lepilemur ankaranensis	0.937175	0.76	True
Mammalia	Primates	Strepsirrhini	Lepilemuridae		Lepilemur dorsalis	0.937175	0.76	True
Mammalia	Primates	Strepsirrhini	Lepilemuridae		Lepilemur edwardsi	0.937175	0.76	True
Mammalia	Primates	Strepsirrhini	Lepilemuridae		Lepilemur hubbardorum	0.937175	0.76	True
Mammalia	Primates	Strepsirrhini	Lepilemuridae		Lepilemur jamesi	0.937175	0.76	True
Mammalia	Primates	Strepsirrhini	Lepilemuridae		Lepilemur leucopus	0.937175	0.76	True
Mammalia	Primates	Strepsirrhini	Lepilemuridae		Lepilemur microdon	0.937175	0.76	True
Mammalia	Primates	Strepsirrhini	Lepilemuridae		Lepilemur mittermeieri	0.937175	0.76	True
Mammalia	Primates	Strepsirrhini	Lepilemuridae		Lepilemur mustelinus	0.937175	0.76	True
Mammalia	Primates	Strepsirrhini	Lepilemuridae		Lepilemur otto	0.937175	0.76	True
Mammalia	Primates	Strepsirrhini	Lepilemuridae		Lepilemur petteri	0.937175	0.76	True
Mammalia	Primates	Strepsirrhini	Lepilemuridae		Lepilemur randrianasoloi	0.937175	0.76	True
Mammalia	Primates	Strepsirrhini	Lepilemuridae		Lepilemur ruficaudatus	0.937175	0.76	True
Mammalia	Primates	Strepsirrhini	Lepilemuridae		Lepilemur sahamalazensis	0.937175	0.76	True
Mammalia	Primates	Strepsirrhini	Lepilemuridae		Lepilemur seali	0.937175	0.76	True
Mammalia	Primates	Strepsirrhini	Lepilemuridae		Lepilemur septentrionalis	0.937175	0.76	True
Mammalia	Primates	Strepsirrhini	Lorisidae	Lorisinae	Loris lydekkerianus	0.937175	0.76	True
Mammalia	Primates	Strepsirrhini	Lorisidae	Lorisinae	Loris tardigradus	0.937175	0.76	True
Mammalia	Primates	Strepsirrhini	Lepilemuridae		Megaladapis edwardsi	0.937175	0.76	True
Mammalia	Primates	Strepsirrhini	Cheirogaleidae		Microcebus arnholdi	0.937175	0.76	True
Mammalia	Primates	Strepsirrhini	Cheirogaleidae		Microcebus berthae	0.937175	0.76	True
Mammalia	Primates	Strepsirrhini	Cheirogaleidae		Microcebus bongolavensis	0.937175	0.76	True
Mammalia	Primates	Strepsirrhini	Cheirogaleidae		Microcebus danfossi	0.937175	0.76	True
Mammalia	Primates	Strepsirrhini	Cheirogaleidae		Microcebus gerpi	0.937175	0.76	True
Mammalia	Primates	Strepsirrhini	Cheirogaleidae		Microcebus griseorufus	0.937175	0.76	True
Mammalia	Primates	Strepsirrhini	Cheirogaleidae		Microcebus jollyae	0.937175	0.76	True
Mammalia	Primates	Strepsirrhini	Cheirogaleidae		Microcebus lehilahytsara	0.937175	0.76	True
Mammalia	Primates	Strepsirrhini	Cheirogaleidae		Microcebus macarthurii	0.937175	0.76	True
Mammalia	Primates	Strepsirrhini	Cheirogaleidae		Microcebus mamiratra	0.937175	0.76	True
Mammalia	Primates	Strepsirrhini	Cheirogaleidae		Microcebus margotmarshae	0.937175	0.76	True
Mammalia	Primates	Strepsirrhini	Cheirogaleidae		Microcebus mittermeieri	0.937175	0.76	True
Mammalia	Primates	Strepsirrhini	Cheirogaleidae		Microcebus murinus	0.937175	0.76	True
Mammalia	Primates	Strepsirrhini	Cheirogaleidae		Microcebus myoxinus	0.937175	0.76	True
Mammalia	Primates	Strepsirrhini	Cheirogaleidae		Microcebus ravelobensis	0.937175	0.76	True
Mammalia	Primates	Strepsirrhini	Cheirogaleidae		Microcebus rufus	0.937175	0.76	True
Mammalia	Primates	Strepsirrhini	Cheirogaleidae		Microcebus sambiranensis	0.937175	0.76	True
Mammalia	Primates	Strepsirrhini	Cheirogaleidae		Microcebus simmonsi	0.937175	0.76	True
Mammalia	Primates	Strepsirrhini	Cheirogaleidae		Microcebus tavaratra	0.937175	0.76	True
Mammalia	Primates	Strepsirrhini	Cheirogaleidae		Mirza coquereli	0.937175	0.76	True
Mammalia	Primates	Strepsirrhini	Cheirogaleidae		Mirza zaza	0.937175	0.76	True
Mammalia	Primates	Strepsirrhini	Lorisidae	Lorisinae	Nycticebus bengalensis	0.937175	0.76	True
Mammalia	Primates	Strepsirrhini	Lorisidae	Lorisinae	Nycticebus coucang	0.937175	0.76	True
Mammalia	Primates	Strepsirrhini	Lorisidae	Lorisinae	Nycticebus javanicus	0.937175	0.76	True
Mammalia	Primates	Strepsirrhini	Lorisidae	Lorisinae	Nycticebus menagensis	0.937175	0.76	True
Mammalia	Primates	Strepsirrhini	Lorisidae	Lorisinae	Nycticebus pygmaeus	0.937175	0.76	True
Mammalia	Primates	Strepsirrhini	Galagidae		Otolemur crassicaudatus	0.937175	0.76	True
Mammalia	Primates	Strepsirrhini	Galagidae		Otolemur garnettii	0.937175	0.76	True
Mammalia	Primates	Strepsirrhini	Galagidae		Otolemur monteiri	0.937175	0.76	True
Mammalia	Primates	Strepsirrhini	Lemuridae		Pachylemur jullyi	0.937175	0.76	True
Mammalia	Primates	Strepsirrhini	Paleopropithecidae		Palaeopropithecus ingens	0.937175	0.76	True
Mammalia	Primates	Strepsirrhini	Paleopropithecidae		Palaeopropithecus maximus	0.937175	0.76	True
Mammalia	Primates	Strepsirrhini	Lorisidae	Perodicticinae	Perodicticus potto	0.937175	0.76	True
Mammalia	Primates	Strepsirrhini	Cheirogaleidae		Phaner pallescens	0.937175	0.76	True
Mammalia	Primates	Strepsirrhini	Lemuridae		Prolemur simus	0.937175	0.76	True
Mammalia	Primates	Strepsirrhini	Indriidae		Propithecus coquereli	0.937175	0.76	True
Mammalia	Primates	Strepsirrhini	Indriidae		Propithecus deckenii	0.937175	0.76	True
Mammalia	Primates	Strepsirrhini	Indriidae		Propithecus diadema	0.937175	0.76	True
Mammalia	Primates	Strepsirrhini	Indriidae		Propithecus edwardsi	0.937175	0.76	True
Mammalia	Primates	Strepsirrhini	Indriidae		Propithecus perrieri	0.937175	0.76	True
Mammalia	Primates	Strepsirrhini	Indriidae		Propithecus tattersalli	0.937175	0.76	True
Mammalia	Primates	Strepsirrhini	Indriidae		Propithecus verreauxi	0.937175	0.76	True
Mammalia	Primates	Strepsirrhini	Lemuridae		Varecia rubra	0.937175	0.76	True
Mammalia	Primates	Strepsirrhini	Lemuridae		Varecia variegata	0.937175	0.76	True
Mammalia	Carnivora	Feliformia	Felidae	Felinae	Acinonyx jubatus	0.936862	0.76	True
Mammalia	Carnivora	Feliformia	Viverridae	Paradoxurinae	Arctogalidia trivirgata	0.936862	0.76	True
Mammalia	Carnivora	Feliformia	Herpestidae		Atilax paludinosus	0.936862	0.76	True
Mammalia	Carnivora	Feliformia	Herpestidae		Bdeogale crassicauda	0.936862	0.76	True
Mammalia	Carnivora	Feliformia	Herpestidae		Bdeogale nigripes	0.936862	0.76	True
Mammalia	Carnivora	Feliformia	Felidae	Felinae	Caracal caracal	0.936862	0.76	True
Mammalia	Carnivora	Feliformia	Felidae	Felinae	Catopuma badia	0.936862	0.76	True
Mammalia	Carnivora	Feliformia	Felidae	Felinae	Catopuma temminckii	0.936862	0.76	True
Mammalia	Carnivora	Feliformia	Viverridae	Hemigalinae	Chrotogale owstoni	0.936862	0.76	True
Mammalia	Carnivora	Feliformia	Viverridae	Viverrinae	Civettictis civetta	0.936862	0.76	True
Mammalia	Carnivora	Feliformia	Herpestidae		Crossarchus alexandri	0.936862	0.76	True
Mammalia	Carnivora	Feliformia	Herpestidae		Crossarchus ansorgei	0.936862	0.76	True
Mammalia	Carnivora	Feliformia	Herpestidae		Crossarchus obscurus	0.936862	0.76	True
Mammalia	Carnivora	Feliformia	Herpestidae		Crossarchus platycephalus	0.936862	0.76	True
Mammalia	Carnivora	Feliformia	Eupleridae	Euplerinae	Cryptoprocta ferox	0.936862	0.76	True
Mammalia	Carnivora	Feliformia	Herpestidae		Cynictis penicillata	0.936862	0.76	True
Mammalia	Carnivora	Feliformia	Viverridae	Hemigalinae	Cynogale bennettii	0.936862	0.76	True
Mammalia	Carnivora	Feliformia	Viverridae	Hemigalinae	Diplogale hosei	0.936862	0.76	True
Mammalia	Carnivora	Feliformia	Eupleridae	Euplerinae	Eupleres goudotii	0.936862	0.76	True
Mammalia	Carnivora	Feliformia	Felidae	Felinae	Felis chaus	0.936862	0.76	True
Mammalia	Carnivora	Feliformia	Felidae	Felinae	Felis margarita	0.936862	0.76	True
Mammalia	Carnivora	Feliformia	Felidae	Felinae	Felis nigripes	0.936862	0.76	True
Mammalia	Carnivora	Feliformia	Felidae	Felinae	Felis silvestris	0.936862	0.76	True
Mammalia	Carnivora	Feliformia	Eupleridae	Euplerinae	Fossa fossana	0.936862	0.76	True
Mammalia	Carnivora	Feliformia	Herpestidae		Galerella nigrata	0.936862	0.76	True
Mammalia	Carnivora	Feliformia	Herpestidae		Galerella pulverulenta	0.936862	0.76	True
Mammalia	Carnivora	Feliformia	Herpestidae		Galerella sanguinea	0.936862	0.76	True
Mammalia	Carnivora	Feliformia	Eupleridae	Galidiinae	Galidia elegans	0.936862	0.76	True
Mammalia	Carnivora	Feliformia	Eupleridae	Galidiinae	Galidictis fasciata	0.936862	0.76	True
Mammalia	Carnivora	Feliformia	Viverridae	Viverrinae	Genetta angolensis	0.936862	0.76	True
Mammalia	Carnivora	Feliformia	Viverridae	Viverrinae	Genetta bourloni	0.936862	0.76	True
Mammalia	Carnivora	Feliformia	Viverridae	Viverrinae	Genetta cristata	0.936862	0.76	True
Mammalia	Carnivora	Feliformia	Viverridae	Viverrinae	Genetta felina	0.936862	0.76	True
Mammalia	Carnivora	Feliformia	Viverridae	Viverrinae	Genetta genetta	0.936862	0.76	True
Mammalia	Carnivora	Feliformia	Viverridae	Viverrinae	Genetta johnstoni	0.936862	0.76	True
Mammalia	Carnivora	Feliformia	Viverridae	Viverrinae	Genetta maculata	0.936862	0.76	True
Mammalia	Carnivora	Feliformia	Viverridae	Viverrinae	Genetta pardina	0.936862	0.76	True
Mammalia	Carnivora	Feliformia	Viverridae	Viverrinae	Genetta poensis	0.936862	0.76	True
Mammalia	Carnivora	Feliformia	Viverridae	Viverrinae	Genetta servalina	0.936862	0.76	True
Mammalia	Carnivora	Feliformia	Viverridae	Viverrinae	Genetta thierryi	0.936862	0.76	True
Mammalia	Carnivora	Feliformia	Viverridae	Viverrinae	Genetta tigrina	0.936862	0.76	True
Mammalia	Carnivora	Feliformia	Viverridae	Viverrinae	Genetta victoriae	0.936862	0.76	True
Mammalia	Carnivora	Feliformia	Herpestidae		Helogale hirtula	0.936862	0.76	True
Mammalia	Carnivora	Feliformia	Herpestidae		Helogale parvula	0.936862	0.76	True
Mammalia	Carnivora	Feliformia	Viverridae	Hemigalinae	Hemigalus derbyanus	0.936862	0.76	True
Mammalia	Carnivora	Feliformia	Herpestidae		Herpestes auropunctatus	0.936862	0.76	True
Mammalia	Carnivora	Feliformia	Herpestidae		Herpestes brachyurus	0.936862	0.76	True
Mammalia	Carnivora	Feliformia	Herpestidae		Herpestes edwardsii	0.936862	0.76	True
Mammalia	Carnivora	Feliformia	Herpestidae		Herpestes fuscus	0.936862	0.76	True
Mammalia	Carnivora	Feliformia	Herpestidae		Herpestes ichneumon	0.936862	0.76	True
Mammalia	Carnivora	Feliformia	Herpestidae		Herpestes javanicus	0.936862	0.76	True
Mammalia	Carnivora	Feliformia	Herpestidae		Herpestes naso	0.936862	0.76	True
Mammalia	Carnivora	Feliformia	Herpestidae		Herpestes smithii	0.936862	0.76	True
Mammalia	Carnivora	Feliformia	Herpestidae		Herpestes urva	0.936862	0.76	True
Mammalia	Carnivora	Feliformia	Herpestidae		Herpestes vitticollis	0.936862	0.76	True
Mammalia	Carnivora	Feliformia	Hyaenidae		Hyaena hyaena	0.936862	0.76	True
Mammalia	Carnivora	Feliformia	Herpestidae		Ichneumia albicauda	0.936862	0.76	True
Mammalia	Carnivora	Feliformia	Felidae	Felinae	Leopardus colocolo	0.936862	0.76	True
Mammalia	Carnivora	Feliformia	Felidae	Felinae	Leopardus geoffroyi	0.936862	0.76	True
Mammalia	Carnivora	Feliformia	Felidae	Felinae	Leopardus guigna	0.936862	0.76	True
Mammalia	Carnivora	Feliformia	Felidae	Felinae	Leopardus jacobita	0.936862	0.76	True
Mammalia	Carnivora	Feliformia	Felidae	Felinae	Leopardus pardalis	0.936862	0.76	True
Mammalia	Carnivora	Feliformia	Felidae	Felinae	Leopardus tigrinus	0.936862	0.76	True
Mammalia	Carnivora	Feliformia	Felidae	Felinae	Leopardus wiedii	0.936862	0.76	True
Mammalia	Carnivora	Feliformia	Felidae	Felinae	Leptailurus serval	0.936862	0.76	True
Mammalia	Carnivora	Feliformia	Herpestidae		Liberiictis kuhni	0.936862	0.76	True
Mammalia	Carnivora	Feliformia	Felidae	Felinae	Lynx pardinus	0.936862	0.76	True
Mammalia	Carnivora	Feliformia	Felidae	Felinae	Lynx rufus	0.936862	0.76	True
Mammalia	Carnivora	Feliformia	Viverridae	Paradoxurinae	Macrogalidia musschenbroekii	0.936862	0.76	True
Mammalia	Carnivora	Feliformia	Herpestidae		Mungos mungo	0.936862	0.76	True
Mammalia	Carnivora	Feliformia	Eupleridae	Galidiinae	Mungotictis decemlineata	0.936862	0.76	True
Mammalia	Carnivora	Feliformia	Nandiniidae		Nandinia binotata	0.936862	0.76	True
Mammalia	Carnivora	Feliformia	Felidae	Pantherinae	Neofelis nebulosa	0.936862	0.76	True
Mammalia	Carnivora	Feliformia	Felidae	Felinae	Otocolobus manul	0.936862	0.76	True
Mammalia	Carnivora	Feliformia	Felidae	Pantherinae	Panthera onca	0.936862	0.76	True
Mammalia	Carnivora	Feliformia	Herpestidae		Paracynictis selousi	0.936862	0.76	True
Mammalia	Carnivora	Feliformia	Viverridae	Paradoxurinae	Paradoxurus hermaphroditus	0.936862	0.76	True
Mammalia	Carnivora	Feliformia	Viverridae	Paradoxurinae	Paradoxurus jerdoni	0.936862	0.76	True
Mammalia	Carnivora	Feliformia	Viverridae	Paradoxurinae	Paradoxurus zeylonensis	0.936862	0.76	True
Mammalia	Carnivora	Feliformia	Hyaenidae		Parahyaena brunnea	0.936862	0.76	True
Mammalia	Carnivora	Feliformia	Felidae	Felinae	Pardofelis marmorata	0.936862	0.76	True
Mammalia	Carnivora	Feliformia	Viverridae	Viverrinae	Poiana richardsonii	0.936862	0.76	True
Mammalia	Carnivora	Feliformia	Felidae	Felinae	Prionailurus bengalensis	0.936862	0.76	True
Mammalia	Carnivora	Feliformia	Felidae	Felinae	Prionailurus iriomotensis	0.936862	0.76	True
Mammalia	Carnivora	Feliformia	Felidae	Felinae	Prionailurus planiceps	0.936862	0.76	True
Mammalia	Carnivora	Feliformia	Felidae	Felinae	Prionailurus rubiginosus	0.936862	0.76	True
Mammalia	Carnivora	Feliformia	Viverridae	Prionodontinae	Prionodon linsang	0.936862	0.76	True
Mammalia	Carnivora	Feliformia	Viverridae	Prionodontinae	Prionodon pardicolor	0.936862	0.76	True
Mammalia	Carnivora	Feliformia	Felidae	Felinae	Profelis aurata	0.936862	0.76	True
Mammalia	Carnivora	Feliformia	Hyaenidae		Proteles cristatus	0.936862	0.76	True
Mammalia	Carnivora	Feliformia	Felidae	Felinae	Puma yagouaroundi	0.936862	0.76	True
Mammalia	Carnivora	Feliformia	Herpestidae		Rhynchogale melleri	0.936862	0.76	True
Mammalia	Carnivora	Feliformia	Eupleridae	Galidiinae	Salanoia concolor	0.936862	0.76	True
Mammalia	Carnivora	Feliformia	Herpestidae		Suricata suricatta	0.936862	0.76	True
Mammalia	Carnivora	Feliformia	Viverridae	Viverrinae	Viverra megaspila	0.936862	0.76	True
Mammalia	Carnivora	Feliformia	Viverridae	Viverrinae	Viverra tangalunga	0.936862	0.76	True
Mammalia	Carnivora	Feliformia	Viverridae	Viverrinae	Viverra zibetha	0.936862	0.76	True
Mammalia	Carnivora	Feliformia	Viverridae	Viverrinae	Viverricula indica	0.936862	0.76	True
Mammalia	Artiodactyla		Bovidae	Caprinae	Capra aegagrus	0.936107	0.76	True
Mammalia	Artiodactyla		Bovidae	Caprinae	Capra caucasica	0.936107	0.76	True
Mammalia	Artiodactyla		Bovidae	Caprinae	Capra cylindricornis	0.936107	0.76	True
Mammalia	Artiodactyla		Bovidae	Caprinae	Capra falconeri	0.936107	0.76	True
Mammalia	Artiodactyla		Bovidae	Caprinae	Capra ibex	0.936107	0.76	True
Mammalia	Artiodactyla		Bovidae	Caprinae	Capra nubiana	0.936107	0.76	True
Mammalia	Artiodactyla		Bovidae	Caprinae	Capra pyrenaica	0.936107	0.76	True
Mammalia	Artiodactyla		Bovidae	Caprinae	Capra sibirica	0.936107	0.76	True
Mammalia	Artiodactyla		Bovidae	Hippotraginae	Addax nasomaculatus	0.934439	0.76	True
Mammalia	Artiodactyla		Bovidae	Alcelaphinae	Alcelaphus buselaphus	0.934439	0.76	True
Mammalia	Artiodactyla		Bovidae	Alcelaphinae	Alcelaphus caama	0.934439	0.76	True
Mammalia	Artiodactyla	Ruminantia	Bovidae	Alcelaphinae	Alcelaphus lichtensteini	0.934439	0.76	True
Mammalia	Artiodactyla		Bovidae	Caprinae	Ammotragus lervia	0.934439	0.76	True
Mammalia	Artiodactyla		Bovidae	Antilopinae	Antidorcas marsupialis	0.934439	0.76	True
Mammalia	Artiodactyla		Bovidae	Antilopinae	Antilope cervicapra	0.934439	0.76	True
Mammalia	Artiodactyla		Bovidae	Alcelaphinae	Beatragus hunteri	0.934439	0.76	True
Mammalia	Artiodactyla		Bovidae	Caprinae	Budorcas taxicolor	0.934439	0.76	True
Mammalia	Artiodactyla		Bovidae	Caprinae	Capra walie	0.934439	0.76	True
Mammalia	Artiodactyla		Bovidae	Caprinae	Capricornis crispus	0.934439	0.76	True
Mammalia	Artiodactyla		Bovidae	Caprinae	Capricornis milneedwardsii	0.934439	0.76	True
Mammalia	Artiodactyla		Bovidae	Caprinae	Capricornis sumatraensis	0.934439	0.76	True
Mammalia	Artiodactyla		Bovidae	Caprinae	Capricornis swinhoei	0.934439	0.76	True
Mammalia	Artiodactyla		Bovidae	Cephalophinae	Cephalophus adersi	0.934439	0.76	True
Mammalia	Artiodactyla		Bovidae	Cephalophinae	Cephalophus callipygus	0.934439	0.76	True
Mammalia	Artiodactyla		Bovidae	Cephalophinae	Cephalophus dorsalis	0.934439	0.76	True
Mammalia	Artiodactyla		Bovidae	Cephalophinae	Cephalophus harveyi	0.934439	0.76	True
Mammalia	Artiodactyla		Bovidae	Cephalophinae	Cephalophus jentinki	0.934439	0.76	True
Mammalia	Artiodactyla		Bovidae	Cephalophinae	Cephalophus leucogaster	0.934439	0.76	True
Mammalia	Artiodactyla		Bovidae	Cephalophinae	Cephalophus natalensis	0.934439	0.76	True
Mammalia	Artiodactyla		Bovidae	Cephalophinae	Cephalophus niger	0.934439	0.76	True
Mammalia	Artiodactyla		Bovidae	Cephalophinae	Cephalophus nigrifrons	0.934439	0.76	True
Mammalia	Artiodactyla		Bovidae	Cephalophinae	Cephalophus ogilbyi	0.934439	0.76	True
Mammalia	Artiodactyla		Bovidae	Cephalophinae	Cephalophus rufilatus	0.934439	0.76	True
Mammalia	Artiodactyla		Bovidae	Cephalophinae	Cephalophus silvicultor	0.934439	0.76	True
Mammalia	Artiodactyla		Bovidae	Cephalophinae	Cephalophus spadix	0.934439	0.76	True
Mammalia	Artiodactyla		Bovidae	Cephalophinae	Cephalophus weynsi	0.934439	0.76	True
Mammalia	Artiodactyla		Bovidae	Cephalophinae	Cephalophus zebra	0.934439	0.76	True
Mammalia	Artiodactyla		Bovidae	Alcelaphinae	Connochaetes gnou	0.934439	0.76	True
Mammalia	Artiodactyla		Bovidae	Alcelaphinae	Connochaetes taurinus	0.934439	0.76	True
Mammalia	Artiodactyla		Bovidae	Alcelaphinae	Damaliscus lunatus	0.934439	0.76	True
Mammalia	Artiodactyla		Bovidae	Alcelaphinae	Damaliscus pygargus	0.934439	0.76	True
Mammalia	Artiodactyla		Bovidae	Antilopinae	Eudorcas rufifrons	0.934439	0.76	True
Mammalia	Artiodactyla		Bovidae	Antilopinae	Eudorcas thomsonii	0.934439	0.76	True
Mammalia	Artiodactyla		Bovidae	Antilopinae	Gazella arabica	0.934439	0.76	True
Mammalia	Artiodactyla		Bovidae	Antilopinae	Gazella bennettii	0.934439	0.76	True
Mammalia	Artiodactyla		Bovidae	Antilopinae	Gazella cuvieri	0.934439	0.76	True
Mammalia	Artiodactyla		Bovidae	Antilopinae	Gazella dorcas	0.934439	0.76	True
Mammalia	Artiodactyla		Bovidae	Antilopinae	Gazella erlangeri	0.934439	0.76	True
Mammalia	Artiodactyla		Bovidae	Antilopinae	Gazella gazella	0.934439	0.76	True
Mammalia	Artiodactyla		Bovidae	Antilopinae	Gazella leptoceros	0.934439	0.76	True
Mammalia	Artiodactyla		Bovidae	Antilopinae	Gazella saudiya	0.934439	0.76	True
Mammalia	Artiodactyla		Bovidae	Antilopinae	Gazella spekei	0.934439	0.76	True
Mammalia	Artiodactyla		Bovidae	Antilopinae	Gazella subgutturosa	0.934439	0.76	True
Mammalia	Artiodactyla		Bovidae	Caprinae	Hemitragus hylocrius	0.934439	0.76	True
Mammalia	Artiodactyla		Bovidae	Caprinae	Hemitragus jayakari	0.934439	0.76	True
Mammalia	Artiodactyla		Bovidae	Caprinae	Hemitragus jemlahicus	0.934439	0.76	True
Mammalia	Artiodactyla		Bovidae	Hippotraginae	Hippotragus equinus	0.934439	0.76	True
Mammalia	Artiodactyla		Bovidae	Hippotraginae	Hippotragus niger	0.934439	0.76	True
Mammalia	Artiodactyla		Bovidae	Antilopinae	Litocranius walleri	0.934439	0.76	True
Mammalia	Artiodactyla	Ruminantia	Bovidae	Caprinae	Myotragus balearicus	0.934439	0.76	True
Mammalia	Artiodactyla		Bovidae	Caprinae	Naemorhedus baileyi	0.934439	0.76	True
Mammalia	Artiodactyla		Bovidae	Caprinae	Naemorhedus caudatus	0.934439	0.76	True
Mammalia	Artiodactyla		Bovidae	Caprinae	Naemorhedus goral	0.934439	0.76	True
Mammalia	Artiodactyla		Bovidae	Caprinae	Naemorhedus griseus	0.934439	0.76	True
Mammalia	Artiodactyla		Bovidae	Antilopinae	Nanger dama	0.934439	0.76	True
Mammalia	Artiodactyla		Bovidae	Antilopinae	Nanger granti	0.934439	0.76	True
Mammalia	Artiodactyla		Bovidae	Antilopinae	Nanger soemmerringii	0.934439	0.76	True
Mammalia	Artiodactyla		Bovidae	Caprinae	Oreamnos americanus	0.934439	0.76	True
Mammalia	Artiodactyla		Bovidae	Hippotraginae	Oryx beisa	0.934439	0.76	True
Mammalia	Artiodactyla		Bovidae	Hippotraginae	Oryx dammah	0.934439	0.76	True
Mammalia	Artiodactyla		Bovidae	Hippotraginae	Oryx gazella	0.934439	0.76	True
Mammalia	Artiodactyla		Bovidae	Hippotraginae	Oryx leucoryx	0.934439	0.76	True
Mammalia	Artiodactyla		Bovidae	Caprinae	Ovibos moschatus	0.934439	0.76	True
Mammalia	Artiodactyla		Bovidae	Caprinae	Ovis ammon	0.934439	0.76	True
Mammalia	Artiodactyla		Bovidae	Caprinae	Ovis canadensis	0.934439	0.76	True
Mammalia	Artiodactyla		Bovidae	Caprinae	Ovis dalli	0.934439	0.76	True
Mammalia	Artiodactyla		Bovidae	Caprinae	Ovis nivicola	0.934439	0.76	True
Mammalia	Artiodactyla		Bovidae	Caprinae	Ovis orientalis	0.934439	0.76	True
Mammalia	Artiodactyla		Bovidae	Caprinae	Ovis vignei	0.934439	0.76	True
Mammalia	Artiodactyla		Bovidae	Cephalophinae	Philantomba maxwellii	0.934439	0.76	True
Mammalia	Artiodactyla		Bovidae	Cephalophinae	Philantomba monticola	0.934439	0.76	True
Mammalia	Artiodactyla		Bovidae	Caprinae	Pseudois nayaur	0.934439	0.76	True
Mammalia	Artiodactyla		Bovidae	Caprinae	Pseudois schaeferi	0.934439	0.76	True
Mammalia	Artiodactyla		Bovidae	Caprinae	Rupicapra pyrenaica	0.934439	0.76	True
Mammalia	Artiodactyla		Bovidae	Caprinae	Rupicapra rupicapra	0.934439	0.76	True
Mammalia	Artiodactyla		Bovidae	Cephalophinae	Sylvicapra grimmia	0.934439	0.76	True
Mammalia	Artiodactyla		Hippopotamidae		Hexaprotodon liberiensis	0.929183	0.76	True
Mammalia	Artiodactyla		Hippopotamidae		Hippopotamus amphibius	0.929183	0.76	True
Mammalia	Artiodactyla		Bovidae	Aepycerotinae	Aepyceros melampus	0.92409	0.76	True
Mammalia	Artiodactyla		Bovidae	Antilopinae	Dorcatragus megalotis	0.92409	0.76	True
Mammalia	Artiodactyla		Bovidae	Reduncinae	Kobus ellipsiprymnus	0.92409	0.76	True
Mammalia	Artiodactyla		Bovidae	Reduncinae	Kobus kob	0.92409	0.76	True
Mammalia	Artiodactyla		Bovidae	Reduncinae	Kobus leche	0.92409	0.76	True
Mammalia	Artiodactyla		Bovidae	Reduncinae	Kobus megaceros	0.92409	0.76	True
Mammalia	Artiodactyla		Bovidae	Antilopinae	Madoqua guentheri	0.92409	0.76	True
Mammalia	Artiodactyla		Bovidae	Antilopinae	Madoqua kirkii	0.92409	0.76	True
Mammalia	Artiodactyla		Bovidae	Antilopinae	Madoqua saltiana	0.92409	0.76	True
Mammalia	Artiodactyla		Bovidae	Antilopinae	Neotragus batesi	0.92409	0.76	True
Mammalia	Artiodactyla		Bovidae	Antilopinae	Neotragus moschatus	0.92409	0.76	True
Mammalia	Artiodactyla		Bovidae	Antilopinae	Oreotragus oreotragus	0.92409	0.76	True
Mammalia	Artiodactyla		Bovidae	Antilopinae	Ourebia ourebi	0.92409	0.76	True
Mammalia	Artiodactyla		Bovidae	Caprinae	Pantholops hodgsonii	0.92409	0.76	True
Mammalia	Artiodactyla		Bovidae	Reduncinae	Pelea capreolus	0.92409	0.76	True
Mammalia	Artiodactyla		Bovidae	Antilopinae	Procapra gutturosa	0.92409	0.76	True
Mammalia	Artiodactyla		Bovidae	Antilopinae	Procapra picticaudata	0.92409	0.76	True
Mammalia	Artiodactyla		Bovidae	Antilopinae	Procapra przewalskii	0.92409	0.76	True
Mammalia	Artiodactyla		Bovidae	Antilopinae	Raphicerus campestris	0.92409	0.76	True
Mammalia	Artiodactyla		Bovidae	Antilopinae	Raphicerus melanotis	0.92409	0.76	True
Mammalia	Artiodactyla		Bovidae	Antilopinae	Raphicerus sharpei	0.92409	0.76	True
Mammalia	Artiodactyla		Bovidae	Reduncinae	Redunca arundinum	0.92409	0.76	True
Mammalia	Artiodactyla		Bovidae	Reduncinae	Redunca fulvorufula	0.92409	0.76	True
Mammalia	Artiodactyla		Bovidae	Reduncinae	Redunca redunca	0.92409	0.76	True
Mammalia	Artiodactyla		Bovidae	Antilopinae	Saiga tatarica	0.92409	0.76	True
Mammalia	Artiodactyla		Bovidae	Bovinae	Bison bison	0.916318	0.76	True
Mammalia	Artiodactyla		Bovidae	Bovinae	Bison bonasus	0.916318	0.76	True
Mammalia	Artiodactyla		Bovidae	Bovinae	Bos frontalis	0.916318	0.76	True
Mammalia	Artiodactyla		Bovidae	Bovinae	Bos gaurus	0.916318	0.76	True
Mammalia	Artiodactyla		Bovidae	Bovinae	Bos grunniens	0.916318	0.76	True
Mammalia	Artiodactyla		Bovidae	Bovinae	Bos indicus	0.916318	0.76	True
Mammalia	Artiodactyla		Bovidae	Bovinae	Bos javanicus	0.916318	0.76	True
Mammalia	Artiodactyla		Bovidae	Bovinae	Bos primigenius	0.916318	0.76	True
Mammalia	Artiodactyla		Bovidae	Bovinae	Bos sauveli	0.916318	0.76	True
Mammalia	Rodentia	Myomorpha	Cricetidae	Neotominae	Nelsonia neotomodon	0.914127	0.76	True
Mammalia	Artiodactyla		Cervidae	Capreolinae	Alces alces	0.913951	0.76	True
Mammalia	Artiodactyla		Cervidae	Capreolinae	Alces americanus	0.913951	0.76	True
Mammalia	Artiodactyla		Cervidae	Cervinae	Axis axis	0.913951	0.76	True
Mammalia	Artiodactyla		Cervidae	Cervinae	Axis kuhlii	0.913951	0.76	True
Mammalia	Artiodactyla		Cervidae	Cervinae	Axis porcinus	0.913951	0.76	True
Mammalia	Artiodactyla		Cervidae	Capreolinae	Blastocerus dichotomus	0.913951	0.76	True
Mammalia	Artiodactyla		Bovidae	Bovinae	Boselaphus tragocamelus	0.913951	0.76	True
Mammalia	Artiodactyla	Ruminantia	Bovidae	Bovinae	Bubalus carabanensis	0.913951	0.76	True
Mammalia	Artiodactyla		Bovidae	Bovinae	Bubalus depressicornis	0.913951	0.76	True
Mammalia	Artiodactyla		Bovidae	Bovinae	Bubalus mindorensis	0.913951	0.76	True
Mammalia	Artiodactyla		Bovidae	Bovinae	Bubalus quarlesi	0.913951	0.76	True
Mammalia	Artiodactyla		Cervidae	Capreolinae	Capreolus capreolus	0.913951	0.76	True
Mammalia	Artiodactyla		Cervidae	Capreolinae	Capreolus pygargus	0.913951	0.76	True
Mammalia	Artiodactyla		Cervidae	Cervinae	Cervus elaphus	0.913951	0.76	True
Mammalia	Artiodactyla		Cervidae	Cervinae	Cervus nippon	0.913951	0.76	True
Mammalia	Artiodactyla		Cervidae	Cervinae	Dama dama	0.913951	0.76	True
Mammalia	Artiodactyla		Cervidae	Cervinae	Dama mesopotamica	0.913951	0.76	True
Mammalia	Artiodactyla		Cervidae	Cervinae	Elaphodus cephalophus	0.913951	0.76	True
Mammalia	Artiodactyla		Cervidae	Cervinae	Elaphurus davidianus	0.913951	0.76	True
Mammalia	Artiodactyla		Cervidae	Capreolinae	Hippocamelus antisensis	0.913951	0.76	True
Mammalia	Artiodactyla		Cervidae	Capreolinae	Hippocamelus bisulcus	0.913951	0.76	True
Mammalia	Artiodactyla		Cervidae	Hydropotinae	Hydropotes inermis	0.913951	0.76	True
Mammalia	Artiodactyla		Cervidae	Capreolinae	Mazama americana	0.913951	0.76	True
Mammalia	Artiodactyla		Cervidae	Capreolinae	Mazama bororo	0.913951	0.76	True
Mammalia	Artiodactyla		Cervidae	Capreolinae	Mazama gouazoupira	0.913951	0.76	True
Mammalia	Artiodactyla		Cervidae	Capreolinae	Mazama nana	0.913951	0.76	True
Mammalia	Artiodactyla	Ruminantia	Cervidae	Odocoileinae	Mazama nemorivaga	0.913951	0.76	True
Mammalia	Artiodactyla		Cervidae	Capreolinae	Mazama rufina	0.913951	0.76	True
Mammalia	Artiodactyla	Ruminantia	Cervidae	Cervinae	Megaloceros giganteus	0.913951	0.76	True
Mammalia	Artiodactyla		Moschidae		Moschus anhuiensis	0.913951	0.76	True
Mammalia	Artiodactyla		Moschidae		Moschus berezovskii	0.913951	0.76	True
Mammalia	Artiodactyla		Moschidae		Moschus chrysogaster	0.913951	0.76	True
Mammalia	Artiodactyla		Moschidae		Moschus fuscus	0.913951	0.76	True
Mammalia	Artiodactyla		Moschidae		Moschus leucogaster	0.913951	0.76	True
Mammalia	Artiodactyla		Moschidae		Moschus moschiferus	0.913951	0.76	True
Mammalia	Artiodactyla		Cervidae	Cervinae	Muntiacus crinifrons	0.913951	0.76	True
Mammalia	Artiodactyla		Cervidae	Cervinae	Muntiacus feae	0.913951	0.76	True
Mammalia	Artiodactyla		Cervidae	Cervinae	Muntiacus gongshanensis	0.913951	0.76	True
Mammalia	Artiodactyla		Cervidae	Cervinae	Muntiacus muntjak	0.913951	0.76	True
Mammalia	Artiodactyla		Cervidae	Cervinae	Muntiacus reevesi	0.913951	0.76	True
Mammalia	Artiodactyla		Cervidae	Cervinae	Muntiacus rooseveltorum	0.913951	0.76	True
Mammalia	Artiodactyla		Cervidae	Cervinae	Muntiacus vuquangensis	0.913951	0.76	True
Mammalia	Artiodactyla		Cervidae	Capreolinae	Ozotoceros bezoarticus	0.913951	0.76	True
Mammalia	Artiodactyla		Cervidae	Cervinae	Przewalskium albirostris	0.913951	0.76	True
Mammalia	Artiodactyla		Bovidae	Bovinae	Pseudoryx nghetinhensis	0.913951	0.76	True
Mammalia	Artiodactyla		Cervidae	Capreolinae	Pudu mephistophiles	0.913951	0.76	True
Mammalia	Artiodactyla		Cervidae	Capreolinae	Pudu puda	0.913951	0.76	True
Mammalia	Artiodactyla		Cervidae	Capreolinae	Rangifer tarandus	0.913951	0.76	True
Mammalia	Artiodactyla		Cervidae	Cervinae	Rucervus duvaucelii	0.913951	0.76	True
Mammalia	Artiodactyla		Cervidae	Cervinae	Rucervus eldii	0.913951	0.76	True
Mammalia	Artiodactyla		Cervidae	Cervinae	Rucervus schomburgki	0.913951	0.76	True
Mammalia	Artiodactyla		Cervidae	Cervinae	Rusa alfredi	0.913951	0.76	True
Mammalia	Artiodactyla		Cervidae	Cervinae	Rusa timorensis	0.913951	0.76	True
Mammalia	Artiodactyla		Cervidae	Cervinae	Rusa unicolor	0.913951	0.76	True
Mammalia	Artiodactyla		Bovidae	Bovinae	Syncerus caffer	0.913951	0.76	True
Mammalia	Artiodactyla		Bovidae	Bovinae	Taurotragus derbianus	0.913951	0.76	True
Mammalia	Artiodactyla		Bovidae	Bovinae	Tetracerus quadricornis	0.913951	0.76	True
Mammalia	Artiodactyla		Bovidae	Bovinae	Tragelaphus angasii	0.913951	0.76	True
Mammalia	Artiodactyla		Bovidae	Bovinae	Tragelaphus buxtoni	0.913951	0.76	True
Mammalia	Artiodactyla		Bovidae	Bovinae	Tragelaphus eurycerus	0.913951	0.76	True
Mammalia	Artiodactyla		Bovidae	Bovinae	Tragelaphus imberbis	0.913951	0.76	True
Mammalia	Artiodactyla	Ruminantia	Bovidae	Bovinae	Tragelaphus oryx	0.913951	0.76	True
Mammalia	Artiodactyla		Bovidae	Bovinae	Tragelaphus scriptus	0.913951	0.76	True
Mammalia	Artiodactyla		Bovidae	Bovinae	Tragelaphus spekii	0.913951	0.76	True
Mammalia	Artiodactyla		Bovidae	Bovinae	Tragelaphus strepsiceros	0.913951	0.76	True
Mammalia	Carnivora	Caniformia	Mustelidae	Lutrinae	Aonyx capensis	0.913408	0.76	True
Mammalia	Carnivora	Caniformia	Mustelidae	Melinae	Arctonyx collaris	0.913408	0.76	True
Mammalia	Carnivora	Caniformia	Procyonidae		Bassaricyon alleni	0.913408	0.76	True
Mammalia	Carnivora	Caniformia	Procyonidae		Bassaricyon beddardi	0.913408	0.76	True
Mammalia	Carnivora	Caniformia	Procyonidae		Bassaricyon gabbii	0.913408	0.76	True
Mammalia	Carnivora	Caniformia	Procyonidae		Bassariscus astutus	0.913408	0.76	True
Mammalia	Carnivora	Caniformia	Procyonidae		Bassariscus sumichrasti	0.913408	0.76	True
Mammalia	Carnivora	Caniformia	Mustelidae	Guloninae	Eira barbara	0.913408	0.76	True
Mammalia	Carnivora	Caniformia	Mustelidae	Lutrinae	Enhydra lutris	0.913408	0.76	True
Mammalia	Carnivora	Caniformia	Mustelidae	Ictonychinae	Galictis cuja	0.913408	0.76	True
Mammalia	Carnivora	Caniformia	Mustelidae	Ictonychinae	Galictis vittata	0.913408	0.76	True
Mammalia	Carnivora	Caniformia	Mustelidae	Guloninae	Gulo gulo	0.913408	0.76	True
Mammalia	Carnivora	Caniformia	Mustelidae	Lutrinae	Hydrictis maculicollis	0.913408	0.76	True
Mammalia	Carnivora	Caniformia	Mustelidae	Ictonychinae	Ictonyx libyca	0.913408	0.76	True
Mammalia	Carnivora	Caniformia	Mustelidae	Ictonychinae	Ictonyx striatus	0.913408	0.76	True
Mammalia	Carnivora	Caniformia	Mustelidae	Lutrinae	Lontra canadensis	0.913408	0.76	True
Mammalia	Carnivora	Caniformia	Mustelidae	Lutrinae	Lontra felina	0.913408	0.76	True
Mammalia	Carnivora	Caniformia	Mustelidae	Lutrinae	Lontra longicaudis	0.913408	0.76	True
Mammalia	Carnivora	Caniformia	Mustelidae	Lutrinae	Lontra provocax	0.913408	0.76	True
Mammalia	Carnivora	Caniformia	Mustelidae	Lutrinae	Lutra sumatrana	0.913408	0.76	True
Mammalia	Carnivora	Caniformia	Mustelidae	Lutrinae	Lutrogale perspicillata	0.913408	0.76	True
Mammalia	Carnivora	Caniformia	Mustelidae	Ictonychinae	Lyncodon patagonicus	0.913408	0.76	True
Mammalia	Carnivora	Caniformia	Mustelidae	Guloninae	Martes americana	0.913408	0.76	True
Mammalia	Carnivora	Caniformia	Mustelidae	Guloninae	Martes flavigula	0.913408	0.76	True
Mammalia	Carnivora	Caniformia	Mustelidae	Guloninae	Martes foina	0.913408	0.76	True
Mammalia	Carnivora	Caniformia	Mustelidae	Guloninae	Martes martes	0.913408	0.76	True
Mammalia	Carnivora	Caniformia	Mustelidae	Guloninae	Martes melampus	0.913408	0.76	True
Mammalia	Carnivora	Caniformia	Mustelidae	Guloninae	Martes pennanti	0.913408	0.76	True
Mammalia	Carnivora	Caniformia	Mustelidae	Guloninae	Martes zibellina	0.913408	0.76	True
Mammalia	Carnivora	Caniformia	Mustelidae	Melinae	Meles anakuma	0.913408	0.76	True
Mammalia	Carnivora	Caniformia	Mustelidae	Melinae	Meles leucurus	0.913408	0.76	True
Mammalia	Carnivora	Caniformia	Mustelidae	Melinae	Meles meles	0.913408	0.76	True
Mammalia	Carnivora	Caniformia	Mustelidae	Mellivorinae	Mellivora capensis	0.913408	0.76	True
Mammalia	Carnivora	Caniformia	Mustelidae	Helictidinae	Melogale moschata	0.913408	0.76	True
Mammalia	Carnivora	Caniformia	Mustelidae	Helictidinae	Melogale personata	0.913408	0.76	True
Mammalia	Carnivora	Caniformia	Mustelidae	Mustelinae	Mustela africana	0.913408	0.76	True
Mammalia	Carnivora	Caniformia	Mustelidae	Mustelinae	Mustela altaica	0.913408	0.76	True
Mammalia	Carnivora	Caniformia	Mustelidae	Mustelinae	Mustela eversmannii	0.913408	0.76	True
Mammalia	Carnivora	Caniformia	Mustelidae	Mustelinae	Mustela felipei	0.913408	0.76	True
Mammalia	Carnivora	Caniformia	Mustelidae	Mustelinae	Mustela frenata	0.913408	0.76	True
Mammalia	Carnivora	Caniformia	Mustelidae	Mustelinae	Mustela itatsi	0.913408	0.76	True
Mammalia	Carnivora	Caniformia	Mustelidae	Mustelinae	Mustela kathiah	0.913408	0.76	True
Mammalia	Carnivora	Caniformia	Mustelidae	Mustelinae	Mustela lutreola	0.913408	0.76	True
Mammalia	Carnivora	Caniformia	Mustelidae	Mustelinae	Mustela nigripes	0.913408	0.76	True
Mammalia	Carnivora	Caniformia	Mustelidae	Mustelinae	Mustela nivalis	0.913408	0.76	True
Mammalia	Carnivora	Caniformia	Mustelidae	Mustelinae	Mustela nudipes	0.913408	0.76	True
Mammalia	Carnivora	Caniformia	Mustelidae	Mustelinae	Mustela sibirica	0.913408	0.76	True
Mammalia	Carnivora	Caniformia	Mustelidae	Mustelinae	Mustela strigidorsa	0.913408	0.76	True
Mammalia	Carnivora	Caniformia	Procyonidae		Nasua narica	0.913408	0.76	True
Mammalia	Carnivora	Caniformia	Procyonidae		Nasuella olivacea	0.913408	0.76	True
Mammalia	Carnivora	Caniformia	Mustelidae	Ictonychinae	Poecilogale albinucha	0.913408	0.76	True
Mammalia	Carnivora	Caniformia	Procyonidae		Potos flavus	0.913408	0.76	True
Mammalia	Carnivora	Caniformia	Procyonidae		Procyon cancrivorus	0.913408	0.76	True
Mammalia	Carnivora	Caniformia	Procyonidae		Procyon lotor	0.913408	0.76	True
Mammalia	Carnivora	Caniformia	Mustelidae	Lutrinae	Pteronura brasiliensis	0.913408	0.76	True
Mammalia	Carnivora	Caniformia	Mustelidae	Taxidiinae	Taxidea taxus	0.913408	0.76	True
Mammalia	Carnivora	Caniformia	Mustelidae	Ictonychinae	Vormela peregusna	0.913408	0.76	True
Mammalia	Rodentia	Myomorpha	Cricetidae	Cricetinae	Allocricetulus curtatus	0.911564	0.76	True
Mammalia	Rodentia	Myomorpha	Cricetidae	Cricetinae	Allocricetulus eversmanni	0.911564	0.76	True
Mammalia	Rodentia	Myomorpha	Cricetidae	Cricetinae	Cricetulus barabensis	0.911564	0.76	True
Mammalia	Rodentia	Myomorpha	Cricetidae	Cricetinae	Cricetulus longicaudatus	0.911564	0.76	True
Mammalia	Rodentia	Myomorpha	Cricetidae	Cricetinae	Cricetulus migratorius	0.911564	0.76	True
Mammalia	Rodentia	Myomorpha	Cricetidae	Cricetinae	Cricetulus sokolovi	0.911564	0.76	True
Mammalia	Rodentia	Myomorpha	Cricetidae	Cricetinae	Cricetus cricetus	0.911564	0.76	True
Mammalia	Rodentia	Myomorpha	Cricetidae	Cricetinae	Mesocricetus brandti	0.911564	0.76	True
Mammalia	Rodentia	Myomorpha	Cricetidae	Cricetinae	Mesocricetus newtoni	0.911564	0.76	True
Mammalia	Rodentia	Myomorpha	Cricetidae	Cricetinae	Mesocricetus raddei	0.911564	0.76	True
Mammalia	Rodentia	Myomorpha	Cricetidae	Cricetinae	Tscherskia triton	0.911564	0.76	True
Mammalia	Rodentia	Myomorpha	Cricetidae	Neotominae	Baiomys musculus	0.91154	0.76	True
Mammalia	Rodentia	Myomorpha	Cricetidae	Neotominae	Baiomys taylori	0.91154	0.76	True
Mammalia	Rodentia	Myomorpha	Cricetidae	Neotominae	Hodomys alleni	0.91154	0.76	True
Mammalia	Rodentia	Myomorpha	Cricetidae	Neotominae	Neotoma albigula	0.91154	0.76	True
Mammalia	Rodentia	Myomorpha	Cricetidae	Neotominae	Neotoma angustapalata	0.91154	0.76	True
Mammalia	Rodentia	Myomorpha	Cricetidae	Neotominae	Neotoma bryanti	0.91154	0.76	True
Mammalia	Rodentia	Myomorpha	Cricetidae	Neotominae	Neotoma devia	0.91154	0.76	True
Mammalia	Rodentia	Myomorpha	Cricetidae	Neotominae	Neotoma ferruginea	0.91154	0.76	True
Mammalia	Rodentia	Myomorpha	Cricetidae	Neotominae	Neotoma floridana	0.91154	0.76	True
Mammalia	Rodentia	Myomorpha	Cricetidae	Neotominae	Neotoma fuscipes	0.91154	0.76	True
Mammalia	Rodentia	Myomorpha	Cricetidae	Neotominae	Neotoma goldmani	0.91154	0.76	True
Mammalia	Rodentia	Myomorpha	Cricetidae	Neotominae	Neotoma isthmica	0.91154	0.76	True
Mammalia	Rodentia	Myomorpha	Cricetidae	Neotominae	Neotoma lepida	0.91154	0.76	True
Mammalia	Rodentia	Myomorpha	Cricetidae	Neotominae	Neotoma leucodon	0.91154	0.76	True
Mammalia	Rodentia	Myomorpha	Cricetidae	Neotominae	Neotoma macrotis	0.91154	0.76	True
Mammalia	Rodentia	Myomorpha	Cricetidae	Neotominae	Neotoma magister	0.91154	0.76	True
Mammalia	Rodentia	Myomorpha	Cricetidae	Neotominae	Neotoma mexicana	0.91154	0.76	True
Mammalia	Rodentia	Myomorpha	Cricetidae	Neotominae	Neotoma micropus	0.91154	0.76	True
Mammalia	Rodentia	Myomorpha	Cricetidae	Neotominae	Neotoma picta	0.91154	0.76	True
Mammalia	Rodentia	Myomorpha	Cricetidae	Neotominae	Neotoma stephensi	0.91154	0.76	True
Mammalia	Rodentia	Myomorpha	Cricetidae	Neotominae	Ochrotomys nuttalli	0.91154	0.76	True
Mammalia	Rodentia	Myomorpha	Cricetidae	Neotominae	Scotinomys teguina	0.91154	0.76	True
Mammalia	Rodentia	Myomorpha	Cricetidae	Neotominae	Scotinomys xerampelinus	0.91154	0.76	True
Mammalia	Rodentia	Myomorpha	Cricetidae	Neotominae	Xenomys nelsoni	0.91154	0.76	True
Mammalia	Artiodactyla		Antilocapridae		Antilocapra americana	0.909531	0.76	True
Mammalia	Artiodactyla		Giraffidae		Giraffa camelopardalis	0.909531	0.76	True
Mammalia	Artiodactyla		Giraffidae		Okapia johnstoni	0.909531	0.76	True
Mammalia	Monotremata		Ornithorhynchidae		Ornithorhynchus anatinus	0.906426	0.76	True
Mammalia	Chiroptera	Yinpterochiroptera	Megadermatidae		Cardioderma cor	0.904553	0.76	True
Mammalia	Chiroptera	Yinpterochiroptera	Rhinonycteridae		Cloeotis percivali	0.904553	0.76	True
Mammalia	Chiroptera	Yinpterochiroptera	Craseonycteridae		Craseonycteris thonglongyai	0.904553	0.76	True
Mammalia	Chiroptera	Yinpterochiroptera	Megadermatidae		Macroderma gigas	0.904553	0.76	True
Mammalia	Chiroptera	Yinpterochiroptera	Megadermatidae		Megaderma lyra	0.904553	0.76	True
Mammalia	Chiroptera	Yinpterochiroptera	Megadermatidae		Megaderma spasma	0.904553	0.76	True
Mammalia	Chiroptera	Yinpterochiroptera	Rhinolophidae		Rhinolophus chaseni	0.904553	0.76	True
Mammalia	Chiroptera	Yinpterochiroptera	Rhinonycteridae		Rhinonicteris aurantia	0.904553	0.76	True
Mammalia	Chiroptera	Yinpterochiroptera	Rhinopomatidae		Rhinopoma hardwickii	0.904553	0.76	True
Mammalia	Chiroptera	Yinpterochiroptera	Rhinopomatidae		Rhinopoma microphyllum	0.904553	0.76	True
Mammalia	Chiroptera	Yinpterochiroptera	Rhinopomatidae		Rhinopoma muscatellum	0.904553	0.76	True
Mammalia	Lagomorpha		Leporidae		Brachylagus idahoensis	0.90388	0.76	True
Mammalia	Lagomorpha		Leporidae		Bunolagus monticularis	0.90388	0.76	True
Mammalia	Lagomorpha		Leporidae		Caprolagus hispidus	0.90388	0.76	True
Mammalia	Lagomorpha		Leporidae		Lepus alleni	0.90388	0.76	True
Mammalia	Lagomorpha		Leporidae		Lepus americanus	0.90388	0.76	True
Mammalia	Lagomorpha		Leporidae		Lepus arcticus	0.90388	0.76	True
Mammalia	Lagomorpha		Leporidae		Lepus brachyurus	0.90388	0.76	True
Mammalia	Lagomorpha		Leporidae		Lepus californicus	0.90388	0.76	True
Mammalia	Lagomorpha		Leporidae		Lepus callotis	0.90388	0.76	True
Mammalia	Lagomorpha		Leporidae		Lepus capensis	0.90388	0.76	True
Mammalia	Lagomorpha		Leporidae		Lepus castroviejoi	0.90388	0.76	True
Mammalia	Lagomorpha		Leporidae		Lepus comus	0.90388	0.76	True
Mammalia	Lagomorpha		Leporidae		Lepus coreanus	0.90388	0.76	True
Mammalia	Lagomorpha		Leporidae		Lepus corsicanus	0.90388	0.76	True
Mammalia	Lagomorpha		Leporidae		Lepus europaeus	0.90388	0.76	True
Mammalia	Lagomorpha		Leporidae		Lepus flavigularis	0.90388	0.76	True
Mammalia	Lagomorpha		Leporidae		Lepus granatensis	0.90388	0.76	True
Mammalia	Lagomorpha		Leporidae		Lepus habessinicus	0.90388	0.76	True
Mammalia	Lagomorpha		Leporidae		Lepus hainanus	0.90388	0.76	True
Mammalia	Lagomorpha		Leporidae		Lepus insularis	0.90388	0.76	True
Mammalia	Lagomorpha		Leporidae		Lepus mandshuricus	0.90388	0.76	True
Mammalia	Lagomorpha		Leporidae		Lepus oiostolus	0.90388	0.76	True
Mammalia	Lagomorpha		Leporidae		Lepus othus	0.90388	0.76	True
Mammalia	Lagomorpha		Leporidae		Lepus saxatilis	0.90388	0.76	True
Mammalia	Lagomorpha		Leporidae		Lepus sinensis	0.90388	0.76	True
Mammalia	Lagomorpha		Leporidae		Lepus starcki	0.90388	0.76	True
Mammalia	Lagomorpha		Leporidae		Lepus timidus	0.90388	0.76	True
Mammalia	Lagomorpha		Leporidae		Lepus tolai	0.90388	0.76	True
Mammalia	Lagomorpha		Leporidae		Lepus townsendii	0.90388	0.76	True
Mammalia	Lagomorpha		Leporidae		Lepus yarkandensis	0.90388	0.76	True
Mammalia	Lagomorpha		Leporidae		Nesolagus netscheri	0.90388	0.76	True
Mammalia	Lagomorpha		Leporidae		Nesolagus timinsi	0.90388	0.76	True
Mammalia	Lagomorpha		Ochotonidae		Ochotona alpina	0.90388	0.76	True
Mammalia	Lagomorpha		Ochotonidae		Ochotona annectens	0.90388	0.76	True
Mammalia	Lagomorpha		Ochotonidae		Ochotona cansus	0.90388	0.76	True
Mammalia	Lagomorpha		Ochotonidae		Ochotona collaris	0.90388	0.76	True
Mammalia	Lagomorpha		Ochotonidae		Ochotona curzoniae	0.90388	0.76	True
Mammalia	Lagomorpha		Ochotonidae		Ochotona dauurica	0.90388	0.76	True
Mammalia	Lagomorpha		Ochotonidae		Ochotona erythrotis	0.90388	0.76	True
Mammalia	Lagomorpha		Ochotonidae		Ochotona forresti	0.90388	0.76	True
Mammalia	Lagomorpha		Ochotonidae		Ochotona gloveri	0.90388	0.76	True
Mammalia	Lagomorpha		Ochotonidae		Ochotona himalayana	0.90388	0.76	True
Mammalia	Lagomorpha		Ochotonidae		Ochotona hoffmanni	0.90388	0.76	True
Mammalia	Lagomorpha		Ochotonidae		Ochotona huangensis	0.90388	0.76	True
Mammalia	Lagomorpha		Ochotonidae		Ochotona hyperborea	0.90388	0.76	True
Mammalia	Lagomorpha		Ochotonidae		Ochotona iliensis	0.90388	0.76	True
Mammalia	Lagomorpha		Ochotonidae		Ochotona koslowi	0.90388	0.76	True
Mammalia	Lagomorpha		Ochotonidae		Ochotona ladacensis	0.90388	0.76	True
Mammalia	Lagomorpha		Ochotonidae		Ochotona macrotis	0.90388	0.76	True
Mammalia	Lagomorpha		Ochotonidae		Ochotona muliensis	0.90388	0.76	True
Mammalia	Lagomorpha		Ochotonidae		Ochotona nubrica	0.90388	0.76	True
Mammalia	Lagomorpha		Ochotonidae		Ochotona pallasi	0.90388	0.76	True
Mammalia	Lagomorpha		Ochotonidae		Ochotona princeps	0.90388	0.76	True
Mammalia	Lagomorpha		Ochotonidae		Ochotona pusilla	0.90388	0.76	True
Mammalia	Lagomorpha		Ochotonidae		Ochotona roylei	0.90388	0.76	True
Mammalia	Lagomorpha		Ochotonidae		Ochotona rufescens	0.90388	0.76	True
Mammalia	Lagomorpha		Ochotonidae		Ochotona rutila	0.90388	0.76	True
Mammalia	Lagomorpha		Ochotonidae		Ochotona thibetana	0.90388	0.76	True
Mammalia	Lagomorpha		Ochotonidae		Ochotona thomasi	0.90388	0.76	True
Mammalia	Lagomorpha		Ochotonidae		Ochotona turuchanensis	0.90388	0.76	True
Mammalia	Lagomorpha		Leporidae		Pentalagus furnessi	0.90388	0.76	True
Mammalia	Lagomorpha		Leporidae		Poelagus marjorita	0.90388	0.76	True
Mammalia	Lagomorpha		Leporidae		Pronolagus crassicaudatus	0.90388	0.76	True
Mammalia	Lagomorpha		Leporidae		Pronolagus randensis	0.90388	0.76	True
Mammalia	Lagomorpha		Leporidae		Pronolagus rupestris	0.90388	0.76	True
Mammalia	Lagomorpha		Leporidae		Pronolagus saundersiae	0.90388	0.76	True
Mammalia	Lagomorpha		Leporidae		Romerolagus diazi	0.90388	0.76	True
Mammalia	Lagomorpha		Leporidae		Sylvilagus aquaticus	0.90388	0.76	True
Mammalia	Lagomorpha		Leporidae		Sylvilagus audubonii	0.90388	0.76	True
Mammalia	Lagomorpha		Leporidae		Sylvilagus bachmani	0.90388	0.76	True
Mammalia	Lagomorpha		Leporidae		Sylvilagus brasiliensis	0.90388	0.76	True
Mammalia	Lagomorpha		Leporidae		Sylvilagus floridanus	0.90388	0.76	True
Mammalia	Lagomorpha		Leporidae		Sylvilagus nuttallii	0.90388	0.76	True
Mammalia	Lagomorpha		Leporidae		Sylvilagus obscurus	0.90388	0.76	True
Mammalia	Lagomorpha		Leporidae		Sylvilagus palustris	0.90388	0.76	True
Mammalia	Lagomorpha		Leporidae		Sylvilagus robustus	0.90388	0.76	True
Mammalia	Lagomorpha		Leporidae		Sylvilagus transitionalis	0.90388	0.76	True
Mammalia	Monotremata		Tachyglossidae		Tachyglossus aculeatus	0.903746	0.76	True
Mammalia	Monotremata		Tachyglossidae		Zaglossus bruijni	0.903746	0.76	True
Mammalia	Artiodactyla		Tragulidae		Hyemoschus aquaticus	0.902661	0.76	True
Mammalia	Artiodactyla		Tragulidae		Moschiola meminna	0.902661	0.76	True
Mammalia	Artiodactyla		Tragulidae		Tragulus javanicus	0.902661	0.76	True
Mammalia	Artiodactyla		Tragulidae		Tragulus napu	0.902661	0.76	True
Mammalia	Chiroptera	Yinpterochiroptera	Hipposideridae		Anthops ornatus	0.901825	0.76	True
Mammalia	Chiroptera	Yinpterochiroptera	Hipposideridae		Asellia tridens	0.901825	0.76	True
Mammalia	Chiroptera	Yinpterochiroptera	Hipposideridae		Hipposideros abae	0.901825	0.76	True
Mammalia	Chiroptera	Yinpterochiroptera	Hipposideridae		Hipposideros boeadii	0.901825	0.76	True
Mammalia	Chiroptera	Yinpterochiroptera	Hipposideridae		Hipposideros coronatus	0.901825	0.76	True
Mammalia	Chiroptera	Yinpterochiroptera	Hipposideridae		Hipposideros jonesi	0.901825	0.76	True
Mammalia	Chiroptera	Yinpterochiroptera	Rhinonycteridae		Paratriaenops auritus	0.901825	0.76	True
Mammalia	Chiroptera	Yinpterochiroptera	Rhinonycteridae		Paratriaenops furculus	0.901825	0.76	True
Mammalia	Rodentia	Myomorpha	Cricetidae	Neotominae	Habromys chinanteco	0.900481	0.76	True
Mammalia	Rodentia	Myomorpha	Cricetidae	Neotominae	Habromys delicatulus	0.900481	0.76	True
Mammalia	Rodentia	Myomorpha	Cricetidae	Neotominae	Habromys ixtlani	0.900481	0.76	True
Mammalia	Rodentia	Myomorpha	Cricetidae	Neotominae	Habromys lepturus	0.900481	0.76	True
Mammalia	Rodentia	Myomorpha	Cricetidae	Neotominae	Habromys lophurus	0.900481	0.76	True
Mammalia	Rodentia	Myomorpha	Cricetidae	Neotominae	Habromys schmidlyi	0.900481	0.76	True
Mammalia	Rodentia	Myomorpha	Cricetidae	Neotominae	Habromys simulatus	0.900481	0.76	True
Mammalia	Rodentia	Myomorpha	Cricetidae	Neotominae	Isthmomys pirrensis	0.900481	0.76	True
Mammalia	Rodentia	Myomorpha	Cricetidae	Neotominae	Megadontomys cryophilus	0.900481	0.76	True
Mammalia	Rodentia	Myomorpha	Cricetidae	Neotominae	Megadontomys nelsoni	0.900481	0.76	True
Mammalia	Rodentia	Myomorpha	Cricetidae	Neotominae	Megadontomys thomasi	0.900481	0.76	True
Mammalia	Rodentia	Myomorpha	Cricetidae	Neotominae	Neotomodon alstoni	0.900481	0.76	True
Mammalia	Rodentia	Myomorpha	Cricetidae	Neotominae	Onychomys arenicola	0.900481	0.76	True
Mammalia	Rodentia	Myomorpha	Cricetidae	Neotominae	Onychomys leucogaster	0.900481	0.76	True
Mammalia	Rodentia	Myomorpha	Cricetidae	Neotominae	Onychomys torridus	0.900481	0.76	True
Mammalia	Rodentia	Myomorpha	Cricetidae	Neotominae	Osgoodomys banderanus	0.900481	0.76	True
Mammalia	Rodentia	Myomorpha	Cricetidae	Neotominae	Peromyscus attwateri	0.900481	0.76	True
Mammalia	Rodentia	Myomorpha	Cricetidae	Neotominae	Peromyscus aztecus	0.900481	0.76	True
Mammalia	Rodentia	Myomorpha	Cricetidae	Neotominae	Peromyscus beatae	0.900481	0.76	True
Mammalia	Rodentia	Myomorpha	Cricetidae	Neotominae	Peromyscus californicus	0.900481	0.76	True
Mammalia	Rodentia	Myomorpha	Cricetidae	Neotominae	Peromyscus crinitus	0.900481	0.76	True
Mammalia	Rodentia	Myomorpha	Cricetidae	Neotominae	Peromyscus dickeyi	0.900481	0.76	True
Mammalia	Rodentia	Myomorpha	Cricetidae	Neotominae	Peromyscus difficilis	0.900481	0.76	True
Mammalia	Rodentia	Myomorpha	Cricetidae	Neotominae	Peromyscus eremicus	0.900481	0.76	True
Mammalia	Rodentia	Myomorpha	Cricetidae	Neotominae	Peromyscus fraterculus	0.900481	0.76	True
Mammalia	Rodentia	Myomorpha	Cricetidae	Neotominae	Peromyscus furvus	0.900481	0.76	True
Mammalia	Rodentia	Myomorpha	Cricetidae	Neotominae	Peromyscus gossypinus	0.900481	0.76	True
Mammalia	Rodentia	Myomorpha	Cricetidae	Neotominae	Peromyscus grandis	0.900481	0.76	True
Mammalia	Rodentia	Myomorpha	Cricetidae	Neotominae	Peromyscus gratus	0.900481	0.76	True
Mammalia	Rodentia	Myomorpha	Cricetidae	Neotominae	Peromyscus guatemalensis	0.900481	0.76	True
Mammalia	Rodentia	Myomorpha	Cricetidae	Neotominae	Peromyscus gymnotis	0.900481	0.76	True
Mammalia	Rodentia	Myomorpha	Cricetidae	Neotominae	Peromyscus hooperi	0.900481	0.76	True
Mammalia	Rodentia	Myomorpha	Cricetidae	Neotominae	Peromyscus hylocetes	0.900481	0.76	True
Mammalia	Rodentia	Myomorpha	Cricetidae	Neotominae	Peromyscus interparietalis	0.900481	0.76	True
Mammalia	Rodentia	Myomorpha	Cricetidae	Neotominae	Peromyscus levipes	0.900481	0.76	True
Mammalia	Rodentia	Myomorpha	Cricetidae	Neotominae	Peromyscus mayensis	0.900481	0.76	True
Mammalia	Rodentia	Myomorpha	Cricetidae	Neotominae	Peromyscus megalops	0.900481	0.76	True
Mammalia	Rodentia	Myomorpha	Cricetidae	Neotominae	Peromyscus mekisturus	0.900481	0.76	True
Mammalia	Rodentia	Myomorpha	Cricetidae	Neotominae	Peromyscus melanocarpus	0.900481	0.76	True
Mammalia	Rodentia	Myomorpha	Cricetidae	Neotominae	Peromyscus melanophrys	0.900481	0.76	True
Mammalia	Rodentia	Myomorpha	Cricetidae	Neotominae	Peromyscus melanotis	0.900481	0.76	True
Mammalia	Rodentia	Myomorpha	Cricetidae	Neotominae	Peromyscus merriami	0.900481	0.76	True
Mammalia	Rodentia	Myomorpha	Cricetidae	Neotominae	Peromyscus mexicanus	0.900481	0.76	True
Mammalia	Rodentia	Myomorpha	Cricetidae	Neotominae	Peromyscus nasutus	0.900481	0.76	True
Mammalia	Rodentia	Myomorpha	Cricetidae	Neotominae	Peromyscus ochraventer	0.900481	0.76	True
Mammalia	Rodentia	Myomorpha	Cricetidae	Neotominae	Peromyscus pectoralis	0.900481	0.76	True
Mammalia	Rodentia	Myomorpha	Cricetidae	Neotominae	Peromyscus perfulvus	0.900481	0.76	True
Mammalia	Rodentia	Myomorpha	Cricetidae	Neotominae	Peromyscus polionotus	0.900481	0.76	True
Mammalia	Rodentia	Myomorpha	Cricetidae	Neotominae	Peromyscus polius	0.900481	0.76	True
Mammalia	Rodentia	Myomorpha	Cricetidae	Neotominae	Peromyscus sagax	0.900481	0.76	True
Mammalia	Rodentia	Myomorpha	Cricetidae	Neotominae	Peromyscus spicilegus	0.900481	0.76	True
Mammalia	Rodentia	Myomorpha	Cricetidae	Neotominae	Peromyscus stirtoni	0.900481	0.76	True
Mammalia	Rodentia	Myomorpha	Cricetidae	Neotominae	Peromyscus truei	0.900481	0.76	True
Mammalia	Rodentia	Myomorpha	Cricetidae	Neotominae	Peromyscus yucatanicus	0.900481	0.76	True
Mammalia	Rodentia	Myomorpha	Cricetidae	Neotominae	Peromyscus zarhynchus	0.900481	0.76	True
Mammalia	Rodentia	Myomorpha	Cricetidae	Neotominae	Podomys floridanus	0.900481	0.76	True
Mammalia	Rodentia	Myomorpha	Cricetidae	Neotominae	Reithrodontomys brevirostris	0.900481	0.76	True
Mammalia	Rodentia	Myomorpha	Cricetidae	Neotominae	Reithrodontomys chrysopsis	0.900481	0.76	True
Mammalia	Rodentia	Myomorpha	Cricetidae	Neotominae	Reithrodontomys creper	0.900481	0.76	True
Mammalia	Rodentia	Myomorpha	Cricetidae	Neotominae	Reithrodontomys fulvescens	0.900481	0.76	True
Mammalia	Rodentia	Myomorpha	Cricetidae	Neotominae	Reithrodontomys gracilis	0.900481	0.76	True
Mammalia	Rodentia	Myomorpha	Cricetidae	Neotominae	Reithrodontomys hirsutus	0.900481	0.76	True
Mammalia	Rodentia	Myomorpha	Cricetidae	Neotominae	Reithrodontomys humulis	0.900481	0.76	True
Mammalia	Rodentia	Myomorpha	Cricetidae	Neotominae	Reithrodontomys megalotis	0.900481	0.76	True
Mammalia	Rodentia	Myomorpha	Cricetidae	Neotominae	Reithrodontomys mexicanus	0.900481	0.76	True
Mammalia	Rodentia	Myomorpha	Cricetidae	Neotominae	Reithrodontomys microdon	0.900481	0.76	True
Mammalia	Rodentia	Myomorpha	Cricetidae	Neotominae	Reithrodontomys montanus	0.900481	0.76	True
Mammalia	Rodentia	Myomorpha	Cricetidae	Neotominae	Reithrodontomys raviventris	0.900481	0.76	True
Mammalia	Rodentia	Myomorpha	Cricetidae	Neotominae	Reithrodontomys spectabilis	0.900481	0.76	True
Mammalia	Rodentia	Myomorpha	Cricetidae	Neotominae	Reithrodontomys sumichrasti	0.900481	0.76	True
Mammalia	Rodentia	Myomorpha	Cricetidae	Neotominae	Reithrodontomys tenuirostris	0.900481	0.76	True
Mammalia	Rodentia	Myomorpha	Cricetidae	Neotominae	Reithrodontomys zacatecae	0.900481	0.76	True
Mammalia	Primates	Haplorrhini	Cercopithecidae	Cercopithecinae	Allenopithecus nigroviridis	0.897416	0.76	True
Mammalia	Primates	Haplorrhini	Cercopithecidae	Cercopithecinae	Cercocebus agilis	0.897416	0.76	True
Mammalia	Primates	Haplorrhini	Cercopithecidae	Cercopithecinae	Cercocebus atys	0.897416	0.76	True
Mammalia	Primates	Haplorrhini	Cercopithecidae	Cercopithecinae	Cercocebus chrysogaster	0.897416	0.76	True
Mammalia	Primates	Haplorrhini	Cercopithecidae	Cercopithecinae	Cercocebus galeritus	0.897416	0.76	True
Mammalia	Primates	Haplorrhini	Cercopithecidae	Cercopithecinae	Cercocebus torquatus	0.897416	0.76	True
Mammalia	Primates	Haplorrhini	Cercopithecidae	Cercopithecinae	Cercopithecus albogularis	0.897416	0.76	True
Mammalia	Primates	Haplorrhini	Cercopithecidae	Cercopithecinae	Cercopithecus ascanius	0.897416	0.76	True
Mammalia	Primates	Haplorrhini	Cercopithecidae	Cercopithecinae	Cercopithecus campbelli	0.897416	0.76	True
Mammalia	Primates	Haplorrhini	Cercopithecidae	Cercopithecinae	Cercopithecus cephus	0.897416	0.76	True
Mammalia	Primates	Haplorrhini	Cercopithecidae	Cercopithecinae	Cercopithecus diana	0.897416	0.76	True
Mammalia	Primates	Haplorrhini	Cercopithecidae	Cercopithecinae	Cercopithecus erythrogaster	0.897416	0.76	True
Mammalia	Primates	Haplorrhini	Cercopithecidae	Cercopithecinae	Cercopithecus erythrotis	0.897416	0.76	True
Mammalia	Primates	Haplorrhini	Cercopithecidae	Cercopithecinae	Cercopithecus hamlyni	0.897416	0.76	True
Mammalia	Primates	Haplorrhini	Cercopithecidae	Cercopithecinae	Cercopithecus lhoesti	0.897416	0.76	True
Mammalia	Primates	Haplorrhini	Cercopithecidae	Cercopithecinae	Cercopithecus lomamiensis	0.897416	0.76	True
Mammalia	Primates	Haplorrhini	Cercopithecidae	Cercopithecinae	Cercopithecus mitis	0.897416	0.76	True
Mammalia	Primates	Haplorrhini	Cercopithecidae	Cercopithecinae	Cercopithecus mona	0.897416	0.76	True
Mammalia	Primates	Haplorrhini	Cercopithecidae	Cercopithecinae	Cercopithecus neglectus	0.897416	0.76	True
Mammalia	Primates	Haplorrhini	Cercopithecidae	Cercopithecinae	Cercopithecus nictitans	0.897416	0.76	True
Mammalia	Primates	Haplorrhini	Cercopithecidae	Cercopithecinae	Cercopithecus petaurista	0.897416	0.76	True
Mammalia	Primates	Haplorrhini	Cercopithecidae	Cercopithecinae	Cercopithecus pogonias	0.897416	0.76	True
Mammalia	Primates	Haplorrhini	Cercopithecidae	Cercopithecinae	Cercopithecus preussi	0.897416	0.76	True
Mammalia	Primates	Haplorrhini	Cercopithecidae	Cercopithecinae	Cercopithecus roloway	0.897416	0.76	True
Mammalia	Primates	Haplorrhini	Cercopithecidae	Cercopithecinae	Cercopithecus solatus	0.897416	0.76	True
Mammalia	Primates	Haplorrhini	Cercopithecidae	Cercopithecinae	Cercopithecus wolfi	0.897416	0.76	True
Mammalia	Primates	Haplorrhini	Cercopithecidae	Cercopithecinae	Chlorocebus aethiops	0.897416	0.76	True
Mammalia	Primates	Haplorrhini	Cercopithecidae	Cercopithecinae	Chlorocebus cynosuros	0.897416	0.76	True
Mammalia	Primates	Haplorrhini	Cercopithecidae	Cercopithecinae	Chlorocebus pygerythrus	0.897416	0.76	True
Mammalia	Primates	Haplorrhini	Cercopithecidae	Cercopithecinae	Chlorocebus tantalus	0.897416	0.76	True
Mammalia	Primates	Haplorrhini	Cercopithecidae	Colobinae	Colobus angolensis	0.897416	0.76	True
Mammalia	Primates	Haplorrhini	Cercopithecidae	Colobinae	Colobus guereza	0.897416	0.76	True
Mammalia	Primates	Haplorrhini	Cercopithecidae	Colobinae	Colobus polykomos	0.897416	0.76	True
Mammalia	Primates	Haplorrhini	Cercopithecidae	Colobinae	Colobus satanas	0.897416	0.76	True
Mammalia	Primates	Haplorrhini	Cercopithecidae	Colobinae	Colobus vellerosus	0.897416	0.76	True
Mammalia	Primates	Haplorrhini	Cercopithecidae	Cercopithecinae	Erythrocebus patas	0.897416	0.76	True
Mammalia	Primates	Haplorrhini	Cercopithecidae	Cercopithecinae	Lophocebus albigena	0.897416	0.76	True
Mammalia	Primates	Haplorrhini	Cercopithecidae	Cercopithecinae	Lophocebus aterrimus	0.897416	0.76	True
Mammalia	Primates	Haplorrhini	Cercopithecidae	Cercopithecinae	Macaca arctoides	0.897416	0.76	True
Mammalia	Primates	Haplorrhini	Cercopithecidae	Cercopithecinae	Macaca assamensis	0.897416	0.76	True
Mammalia	Primates	Haplorrhini	Cercopithecidae	Cercopithecinae	Macaca brunnescens	0.897416	0.76	True
Mammalia	Primates	Haplorrhini	Cercopithecidae	Cercopithecinae	Macaca cyclopis	0.897416	0.76	True
Mammalia	Primates	Haplorrhini	Cercopithecidae	Cercopithecinae	Macaca fuscata	0.897416	0.76	True
Mammalia	Primates	Haplorrhini	Cercopithecidae	Cercopithecinae	Macaca hecki	0.897416	0.76	True
Mammalia	Primates	Haplorrhini	Cercopithecidae	Cercopithecinae	Macaca leonina	0.897416	0.76	True
Mammalia	Primates	Haplorrhini	Cercopithecidae	Cercopithecinae	Macaca maura	0.897416	0.76	True
Mammalia	Primates	Haplorrhini	Cercopithecidae	Cercopithecinae	Macaca munzala	0.897416	0.76	True
Mammalia	Primates	Haplorrhini	Cercopithecidae	Cercopithecinae	Macaca nemestrina	0.897416	0.76	True
Mammalia	Primates	Haplorrhini	Cercopithecidae	Cercopithecinae	Macaca nigra	0.897416	0.76	True
Mammalia	Primates	Haplorrhini	Cercopithecidae	Cercopithecinae	Macaca nigrescens	0.897416	0.76	True
Mammalia	Primates	Haplorrhini	Cercopithecidae	Cercopithecinae	Macaca ochreata	0.897416	0.76	True
Mammalia	Primates	Haplorrhini	Cercopithecidae	Cercopithecinae	Macaca pagensis	0.897416	0.76	True
Mammalia	Primates	Haplorrhini	Cercopithecidae	Cercopithecinae	Macaca radiata	0.897416	0.76	True
Mammalia	Primates	Haplorrhini	Cercopithecidae	Cercopithecinae	Macaca siberu	0.897416	0.76	True
Mammalia	Primates	Haplorrhini	Cercopithecidae	Cercopithecinae	Macaca silenus	0.897416	0.76	True
Mammalia	Primates	Haplorrhini	Cercopithecidae	Cercopithecinae	Macaca sinica	0.897416	0.76	True
Mammalia	Primates	Haplorrhini	Cercopithecidae	Cercopithecinae	Macaca sylvanus	0.897416	0.76	True
Mammalia	Primates	Haplorrhini	Cercopithecidae	Cercopithecinae	Macaca thibetana	0.897416	0.76	True
Mammalia	Primates	Haplorrhini	Cercopithecidae	Cercopithecinae	Macaca tonkeana	0.897416	0.76	True
Mammalia	Primates	Haplorrhini	Cercopithecidae	Cercopithecinae	Mandrillus leucophaeus	0.897416	0.76	True
Mammalia	Primates	Haplorrhini	Cercopithecidae	Cercopithecinae	Miopithecus ogouensis	0.897416	0.76	True
Mammalia	Primates	Haplorrhini	Cercopithecidae	Cercopithecinae	Miopithecus talapoin	0.897416	0.76	True
Mammalia	Primates	Haplorrhini	Cercopithecidae	Colobinae	Nasalis larvatus	0.897416	0.76	True
Mammalia	Primates	Haplorrhini	Cercopithecidae	Cercopithecinae	Papio cynocephalus	0.897416	0.76	True
Mammalia	Primates	Haplorrhini	Cercopithecidae	Cercopithecinae	Papio hamadryas	0.897416	0.76	True
Mammalia	Primates	Haplorrhini	Cercopithecidae	Cercopithecinae	Papio kindae	0.897416	0.76	True
Mammalia	Primates	Haplorrhini	Cercopithecidae	Cercopithecinae	Papio papio	0.897416	0.76	True
Mammalia	Primates	Haplorrhini	Cercopithecidae	Cercopithecinae	Papio ursinus	0.897416	0.76	True
Mammalia	Primates	Haplorrhini	Cercopithecidae	Colobinae	Piliocolobus badius	0.897416	0.76	True
Mammalia	Primates	Haplorrhini	Cercopithecidae	Colobinae	Piliocolobus foai	0.897416	0.76	True
Mammalia	Primates	Haplorrhini	Cercopithecidae	Colobinae	Piliocolobus gordonorum	0.897416	0.76	True
Mammalia	Primates	Haplorrhini	Cercopithecidae	Colobinae	Piliocolobus kirkii	0.897416	0.76	True
Mammalia	Primates	Haplorrhini	Cercopithecidae	Colobinae	Piliocolobus pennantii	0.897416	0.76	True
Mammalia	Primates	Haplorrhini	Cercopithecidae	Colobinae	Piliocolobus preussi	0.897416	0.76	True
Mammalia	Primates	Haplorrhini	Cercopithecidae	Colobinae	Piliocolobus rufomitratus	0.897416	0.76	True
Mammalia	Primates	Haplorrhini	Cercopithecidae	Colobinae	Piliocolobus tholloni	0.897416	0.76	True
Mammalia	Primates	Haplorrhini	Cercopithecidae	Colobinae	Presbytis chrysomelas	0.897416	0.76	True
Mammalia	Primates	Haplorrhini	Cercopithecidae	Colobinae	Presbytis comata	0.897416	0.76	True
Mammalia	Primates	Haplorrhini	Cercopithecidae	Colobinae	Presbytis femoralis	0.897416	0.76	True
Mammalia	Primates	Haplorrhini	Cercopithecidae	Colobinae	Presbytis frontata	0.897416	0.76	True
Mammalia	Primates	Haplorrhini	Cercopithecidae	Colobinae	Presbytis hosei	0.897416	0.76	True
Mammalia	Primates	Haplorrhini	Cercopithecidae	Colobinae	Presbytis melalophos	0.897416	0.76	True
Mammalia	Primates	Haplorrhini	Cercopithecidae	Colobinae	Presbytis potenziani	0.897416	0.76	True
Mammalia	Primates	Haplorrhini	Cercopithecidae	Colobinae	Presbytis rubicunda	0.897416	0.76	True
Mammalia	Primates	Haplorrhini	Cercopithecidae	Colobinae	Presbytis thomasi	0.897416	0.76	True
Mammalia	Primates	Haplorrhini	Cercopithecidae	Colobinae	Procolobus verus	0.897416	0.76	True
Mammalia	Primates	Haplorrhini	Cercopithecidae	Colobinae	Pygathrix cinerea	0.897416	0.76	True
Mammalia	Primates	Haplorrhini	Cercopithecidae	Colobinae	Pygathrix nemaeus	0.897416	0.76	True
Mammalia	Primates	Haplorrhini	Cercopithecidae	Colobinae	Pygathrix nigripes	0.897416	0.76	True
Mammalia	Primates	Haplorrhini	Cercopithecidae	Colobinae	Rhinopithecus avunculus	0.897416	0.76	True
Mammalia	Primates	Haplorrhini	Cercopithecidae	Colobinae	Rhinopithecus bieti	0.897416	0.76	True
Mammalia	Primates	Haplorrhini	Cercopithecidae	Colobinae	Rhinopithecus brelichi	0.897416	0.76	True
Mammalia	Primates	Haplorrhini	Cercopithecidae	Colobinae	Rhinopithecus strykeri	0.897416	0.76	True
Mammalia	Primates	Haplorrhini	Cercopithecidae	Cercopithecinae	Rungwecebus kipunji	0.897416	0.76	True
Mammalia	Primates	Haplorrhini	Cercopithecidae	Colobinae	Semnopithecus entellus	0.897416	0.76	True
Mammalia	Primates	Haplorrhini	Cercopithecidae	Colobinae	Semnopithecus hector	0.897416	0.76	True
Mammalia	Primates	Haplorrhini	Cercopithecidae	Colobinae	Semnopithecus priam	0.897416	0.76	True
Mammalia	Primates	Haplorrhini	Cercopithecidae	Colobinae	Simias concolor	0.897416	0.76	True
Mammalia	Primates	Haplorrhini	Cercopithecidae	Colobinae	Trachypithecus auratus	0.897416	0.76	True
Mammalia	Primates	Haplorrhini	Cercopithecidae	Colobinae	Trachypithecus barbei	0.897416	0.76	True
Mammalia	Primates	Haplorrhini	Cercopithecidae	Colobinae	Trachypithecus cristatus	0.897416	0.76	True
Mammalia	Primates	Haplorrhini	Cercopithecidae	Colobinae	Trachypithecus delacouri	0.897416	0.76	True
Mammalia	Primates	Haplorrhini	Cercopithecidae	Colobinae	Trachypithecus francoisi	0.897416	0.76	True
Mammalia	Primates	Haplorrhini	Cercopithecidae	Colobinae	Trachypithecus geei	0.897416	0.76	True
Mammalia	Primates	Haplorrhini	Cercopithecidae	Colobinae	Trachypithecus germaini	0.897416	0.76	True
Mammalia	Primates	Haplorrhini	Cercopithecidae	Colobinae	Trachypithecus hatinhensis	0.897416	0.76	True
Mammalia	Primates	Haplorrhini	Cercopithecidae	Colobinae	Trachypithecus johnii	0.897416	0.76	True
Mammalia	Primates	Haplorrhini	Cercopithecidae	Colobinae	Trachypithecus laotum	0.897416	0.76	True
Mammalia	Primates	Haplorrhini	Cercopithecidae	Colobinae	Trachypithecus obscurus	0.897416	0.76	True
Mammalia	Primates	Haplorrhini	Cercopithecidae	Colobinae	Trachypithecus phayrei	0.897416	0.76	True
Mammalia	Primates	Haplorrhini	Cercopithecidae	Colobinae	Trachypithecus pileatus	0.897416	0.76	True
Mammalia	Primates	Haplorrhini	Cercopithecidae	Colobinae	Trachypithecus poliocephalus	0.897416	0.76	True
Mammalia	Primates	Haplorrhini	Cercopithecidae	Colobinae	Trachypithecus shortridgei	0.897416	0.76	True
Mammalia	Primates	Haplorrhini	Cercopithecidae	Colobinae	Trachypithecus vetulus	0.897416	0.76	True
Mammalia	Rodentia	Myomorpha	Cricetidae	Neotominae	Peromyscus boylii	0.897248	0.76	True
Mammalia	Rodentia	Myomorpha	Cricetidae	Neotominae	Peromyscus caniceps	0.897248	0.76	True
Mammalia	Rodentia	Myomorpha	Cricetidae	Neotominae	Peromyscus eva	0.897248	0.76	True
Mammalia	Rodentia	Myomorpha	Cricetidae	Neotominae	Peromyscus keeni	0.897248	0.76	True
Mammalia	Rodentia	Myomorpha	Cricetidae	Neotominae	Peromyscus madrensis	0.897248	0.76	True
Mammalia	Rodentia	Myomorpha	Cricetidae	Neotominae	Peromyscus sejugis	0.897248	0.76	True
Mammalia	Rodentia	Myomorpha	Cricetidae	Neotominae	Peromyscus simulus	0.897248	0.76	True
Mammalia	Rodentia	Myomorpha	Cricetidae	Neotominae	Peromyscus slevini	0.897248	0.76	True
Mammalia	Rodentia	Myomorpha	Cricetidae	Neotominae	Peromyscus stephani	0.897248	0.76	True
Mammalia	Rodentia	Myomorpha	Cricetidae	Neotominae	Peromyscus winkelmanni	0.897248	0.76	True
Mammalia	Primates	Haplorrhini	Hominidae	Homininae	Gorilla beringei	0.894902	0.76	True
Mammalia	Primates	Haplorrhini	Hylobatidae		Hoolock hoolock	0.894902	0.76	True
Mammalia	Primates	Haplorrhini	Hylobatidae		Hoolock leuconedys	0.894902	0.76	True
Mammalia	Primates	Haplorrhini	Hylobatidae		Hylobates agilis	0.894902	0.76	True
Mammalia	Primates	Haplorrhini	Hylobatidae		Hylobates alibarbis	0.894902	0.76	True
Mammalia	Primates	Haplorrhini	Hylobatidae		Hylobates klossii	0.894902	0.76	True
Mammalia	Primates	Haplorrhini	Hylobatidae		Hylobates lar	0.894902	0.76	True
Mammalia	Primates	Haplorrhini	Hylobatidae		Hylobates moloch	0.894902	0.76	True
Mammalia	Primates	Haplorrhini	Hylobatidae		Hylobates muelleri	0.894902	0.76	True
Mammalia	Primates	Haplorrhini	Hylobatidae		Hylobates pileatus	0.894902	0.76	True
Mammalia	Primates	Haplorrhini	Hylobatidae		Nomascus concolor	0.894902	0.76	True
Mammalia	Primates	Haplorrhini	Hylobatidae		Nomascus gabriellae	0.894902	0.76	True
Mammalia	Primates	Haplorrhini	Hylobatidae		Nomascus hainanus	0.894902	0.76	True
Mammalia	Primates	Haplorrhini	Hylobatidae		Nomascus nasutus	0.894902	0.76	True
Mammalia	Primates	Haplorrhini	Hylobatidae		Nomascus siki	0.894902	0.76	True
Mammalia	Primates	Haplorrhini	Hominidae	Homininae	Pan paniscus	0.894902	0.76	True
Mammalia	Primates	Haplorrhini	Hominidae	Ponginae	Pongo pygmaeus	0.894902	0.76	True
Mammalia	Primates	Haplorrhini	Hylobatidae		Symphalangus syndactylus	0.894902	0.76	True
Mammalia	Chiroptera	Yinpterochiroptera	Rhinolophidae		Rhinolophus blythi	0.890107	0.76	True
Mammalia	Chiroptera	Yinpterochiroptera	Rhinolophidae		Rhinolophus rex	0.890107	0.76	True
Mammalia	Chiroptera	Yinpterochiroptera	Rhinolophidae		Rhinolophus rouxii	0.890107	0.76	True
Mammalia	Chiroptera	Microchiroptera	Rhinolophidae	Rhinolophinae	Rhinolophus yunnanensis	0.890107	0.76	True
Mammalia	Chiroptera	Yinpterochiroptera	Hipposideridae		Aselliscus tricuspidatus	0.884615	0.76	True
Mammalia	Chiroptera	Yinpterochiroptera	Hipposideridae		Coelops frithii	0.884615	0.76	True
Mammalia	Chiroptera	Yinpterochiroptera	Hipposideridae		Coelops robinsoni	0.884615	0.76	True
Mammalia	Chiroptera	Yinpterochiroptera	Hipposideridae		Hipposideros alongensis	0.884615	0.76	True
Mammalia	Chiroptera	Yinpterochiroptera	Hipposideridae		Hipposideros ater	0.884615	0.76	True
Mammalia	Chiroptera	Yinpterochiroptera	Hipposideridae		Hipposideros beatus	0.884615	0.76	True
Mammalia	Chiroptera	Yinpterochiroptera	Hipposideridae		Hipposideros bicolor	0.884615	0.76	True
Mammalia	Chiroptera	Yinpterochiroptera	Hipposideridae		Hipposideros caffer	0.884615	0.76	True
Mammalia	Chiroptera	Yinpterochiroptera	Hipposideridae		Hipposideros calcaratus	0.884615	0.76	True
Mammalia	Chiroptera	Yinpterochiroptera	Hipposideridae		Hipposideros cervinus	0.884615	0.76	True
Mammalia	Chiroptera	Yinpterochiroptera	Hipposideridae		Hipposideros commersoni	0.884615	0.76	True
Mammalia	Chiroptera	Yinpterochiroptera	Hipposideridae		Hipposideros coxi	0.884615	0.76	True
Mammalia	Chiroptera	Yinpterochiroptera	Hipposideridae		Hipposideros cyclops	0.884615	0.76	True
Mammalia	Chiroptera	Yinpterochiroptera	Hipposideridae		Hipposideros diadema	0.884615	0.76	True
Mammalia	Chiroptera	Yinpterochiroptera	Hipposideridae		Hipposideros doriae	0.884615	0.76	True
Mammalia	Chiroptera	Yinpterochiroptera	Hipposideridae		Hipposideros dyacorum	0.884615	0.76	True
Mammalia	Chiroptera	Yinpterochiroptera	Hipposideridae		Hipposideros fuliginosus	0.884615	0.76	True
Mammalia	Chiroptera	Yinpterochiroptera	Hipposideridae		Hipposideros fulvus	0.884615	0.76	True
Mammalia	Chiroptera	Yinpterochiroptera	Hipposideridae		Hipposideros galeritus	0.884615	0.76	True
Mammalia	Chiroptera	Yinpterochiroptera	Hipposideridae		Hipposideros gigas	0.884615	0.76	True
Mammalia	Chiroptera	Yinpterochiroptera	Hipposideridae		Hipposideros halophyllus	0.884615	0.76	True
Mammalia	Chiroptera	Yinpterochiroptera	Hipposideridae		Hipposideros lankadiva	0.884615	0.76	True
Mammalia	Chiroptera	Yinpterochiroptera	Hipposideridae		Hipposideros lekaguli	0.884615	0.76	True
Mammalia	Chiroptera	Yinpterochiroptera	Hipposideridae		Hipposideros obscurus	0.884615	0.76	True
Mammalia	Chiroptera	Yinpterochiroptera	Hipposideridae		Hipposideros pelingensis	0.884615	0.76	True
Mammalia	Chiroptera	Yinpterochiroptera	Hipposideridae		Hipposideros pygmaeus	0.884615	0.76	True
Mammalia	Chiroptera	Yinpterochiroptera	Hipposideridae		Hipposideros ridleyi	0.884615	0.76	True
Mammalia	Chiroptera	Yinpterochiroptera	Hipposideridae		Hipposideros ruber	0.884615	0.76	True
Mammalia	Chiroptera	Yinpterochiroptera	Hipposideridae		Hipposideros speoris	0.884615	0.76	True
Mammalia	Chiroptera	Yinpterochiroptera	Hipposideridae		Hipposideros turpis	0.884615	0.76	True
Mammalia	Chiroptera	Yinpterochiroptera	Rhinolophidae		Rhinolophus rufus	0.884615	0.76	True
Mammalia	Chiroptera	Yinpterochiroptera	Rhinonycteridae		Triaenops afer	0.884615	0.76	True
Mammalia	Chiroptera	Yinpterochiroptera	Rhinonycteridae		Triaenops persicus	0.884615	0.76	True
Mammalia	Chiroptera	Yinpterochiroptera	Rhinonycteridae		Triaenops rufus	0.884615	0.76	True
Mammalia	Rodentia	Myomorpha	Muridae	Deomyinae	Acomys cahirinus	0.878988	0.76	True
Mammalia	Rodentia	Myomorpha	Muridae	Deomyinae	Acomys chudeaui	0.878988	0.76	True
Mammalia	Rodentia	Myomorpha	Muridae	Deomyinae	Acomys cilicicus	0.878988	0.76	True
Mammalia	Rodentia	Myomorpha	Muridae	Deomyinae	Acomys cineraceus	0.878988	0.76	True
Mammalia	Rodentia	Myomorpha	Muridae	Deomyinae	Acomys dimidiatus	0.878988	0.76	True
Mammalia	Rodentia	Myomorpha	Muridae	Deomyinae	Acomys ignitus	0.878988	0.76	True
Mammalia	Rodentia	Myomorpha	Muridae	Deomyinae	Acomys johannis	0.878988	0.76	True
Mammalia	Rodentia	Myomorpha	Muridae	Deomyinae	Acomys kempi	0.878988	0.76	True
Mammalia	Rodentia	Myomorpha	Muridae	Deomyinae	Acomys minous	0.878988	0.76	True
Mammalia	Rodentia	Myomorpha	Muridae	Deomyinae	Acomys nesiotes	0.878988	0.76	True
Mammalia	Rodentia	Myomorpha	Muridae	Deomyinae	Acomys ngurui	0.878988	0.76	True
Mammalia	Rodentia	Myomorpha	Muridae	Deomyinae	Acomys percivali	0.878988	0.76	True
Mammalia	Rodentia	Myomorpha	Muridae	Deomyinae	Acomys russatus	0.878988	0.76	True
Mammalia	Rodentia	Myomorpha	Muridae	Deomyinae	Acomys spinosissimus	0.878988	0.76	True
Mammalia	Rodentia	Myomorpha	Muridae	Deomyinae	Acomys subspinosus	0.878988	0.76	True
Mammalia	Rodentia	Myomorpha	Muridae	Deomyinae	Acomys wilsoni	0.878988	0.76	True
Mammalia	Rodentia	Myomorpha	Muridae	Gerbillinae	Brachiones przewalskii	0.878988	0.76	True
Mammalia	Rodentia	Myomorpha	Muridae	Deomyinae	Deomys ferrugineus	0.878988	0.76	True
Mammalia	Rodentia	Myomorpha	Muridae	Gerbillinae	Desmodilliscus braueri	0.878988	0.76	True
Mammalia	Rodentia	Myomorpha	Muridae	Gerbillinae	Desmodillus auricularis	0.878988	0.76	True
Mammalia	Rodentia	Myomorpha	Muridae	Gerbillinae	Gerbilliscus afra	0.878988	0.76	True
Mammalia	Rodentia	Myomorpha	Muridae	Gerbillinae	Gerbilliscus brantsii	0.878988	0.76	True
Mammalia	Rodentia	Myomorpha	Muridae	Gerbillinae	Gerbilliscus gambianus	0.878988	0.76	True
Mammalia	Rodentia	Myomorpha	Muridae	Gerbillinae	Gerbilliscus guineae	0.878988	0.76	True
Mammalia	Rodentia	Myomorpha	Muridae	Gerbillinae	Gerbilliscus kempi	0.878988	0.76	True
Mammalia	Rodentia	Myomorpha	Muridae	Gerbillinae	Gerbilliscus leucogaster	0.878988	0.76	True
Mammalia	Rodentia	Myomorpha	Muridae	Gerbillinae	Gerbilliscus nigricaudus	0.878988	0.76	True
Mammalia	Rodentia	Myomorpha	Muridae	Gerbillinae	Gerbilliscus phillipsi	0.878988	0.76	True
Mammalia	Rodentia	Myomorpha	Muridae	Gerbillinae	Gerbilliscus robustus	0.878988	0.76	True
Mammalia	Rodentia	Myomorpha	Muridae	Gerbillinae	Gerbilliscus validus	0.878988	0.76	True
Mammalia	Rodentia	Myomorpha	Muridae	Gerbillinae	Gerbilliscus vicinus	0.878988	0.76	True
Mammalia	Rodentia	Myomorpha	Muridae	Gerbillinae	Gerbillurus paeba	0.878988	0.76	True
Mammalia	Rodentia	Myomorpha	Muridae	Gerbillinae	Gerbillurus setzeri	0.878988	0.76	True
Mammalia	Rodentia	Myomorpha	Muridae	Gerbillinae	Gerbillurus tytonis	0.878988	0.76	True
Mammalia	Rodentia	Myomorpha	Muridae	Gerbillinae	Gerbillurus vallinus	0.878988	0.76	True
Mammalia	Rodentia	Myomorpha	Cricetidae	Lophiomyinae	Lophiomys imhausi	0.878988	0.76	True
Mammalia	Rodentia	Myomorpha	Muridae	Deomyinae	Lophuromys brevicaudus	0.878988	0.76	True
Mammalia	Rodentia	Myomorpha	Muridae	Deomyinae	Lophuromys chrysopus	0.878988	0.76	True
Mammalia	Rodentia	Myomorpha	Muridae	Deomyinae	Lophuromys flavopunctatus	0.878988	0.76	True
Mammalia	Rodentia	Myomorpha	Muridae	Deomyinae	Lophuromys melanonyx	0.878988	0.76	True
Mammalia	Rodentia	Myomorpha	Muridae	Deomyinae	Lophuromys sikapusi	0.878988	0.76	True
Mammalia	Rodentia	Myomorpha	Muridae	Deomyinae	Lophuromys woosnami	0.878988	0.76	True
Mammalia	Rodentia	Myomorpha	Muridae	Deomyinae	Lophuromys zena	0.878988	0.76	True
Mammalia	Rodentia	Myomorpha	Muridae	Gerbillinae	Pachyuromys duprasi	0.878988	0.76	True
Mammalia	Rodentia	Myomorpha	Muridae	Gerbillinae	Psammomys obesus	0.878988	0.76	True
Mammalia	Rodentia	Myomorpha	Muridae	Gerbillinae	Psammomys vexillaris	0.878988	0.76	True
Mammalia	Rodentia	Myomorpha	Muridae	Gerbillinae	Rhombomys opimus	0.878988	0.76	True
Mammalia	Rodentia	Myomorpha	Muridae	Gerbillinae	Sekeetamys calurus	0.878988	0.76	True
Mammalia	Rodentia	Myomorpha	Muridae	Deomyinae	Uranomys ruddi	0.878988	0.76	True
Mammalia	Rodentia	Myomorpha	Muridae	Gerbillinae	Dipodillus campestris	0.875413	0.76	True
Mammalia	Rodentia	Myomorpha	Muridae	Gerbillinae	Dipodillus dasyurus	0.875413	0.76	True
Mammalia	Rodentia	Myomorpha	Muridae	Gerbillinae	Dipodillus rupicola	0.875413	0.76	True
Mammalia	Rodentia	Myomorpha	Muridae	Gerbillinae	Dipodillus simoni	0.875413	0.76	True
Mammalia	Rodentia	Myomorpha	Muridae	Gerbillinae	Gerbillus andersoni	0.875413	0.76	True
Mammalia	Rodentia	Myomorpha	Muridae	Gerbillinae	Gerbillus gerbillus	0.875413	0.76	True
Mammalia	Rodentia	Myomorpha	Muridae	Gerbillinae	Gerbillus henleyi	0.875413	0.76	True
Mammalia	Rodentia	Myomorpha	Muridae	Gerbillinae	Gerbillus hesperinus	0.875413	0.76	True
Mammalia	Rodentia	Myomorpha	Muridae	Gerbillinae	Gerbillus hoogstrali	0.875413	0.76	True
Mammalia	Rodentia	Myomorpha	Muridae	Gerbillinae	Gerbillus latastei	0.875413	0.76	True
Mammalia	Rodentia	Myomorpha	Muridae	Gerbillinae	Gerbillus nancillus	0.875413	0.76	True
Mammalia	Rodentia	Myomorpha	Muridae	Gerbillinae	Gerbillus nanus	0.875413	0.76	True
Mammalia	Rodentia	Myomorpha	Muridae	Gerbillinae	Gerbillus nigeriae	0.875413	0.76	True
Mammalia	Rodentia	Myomorpha	Muridae	Gerbillinae	Gerbillus occiduus	0.875413	0.76	True
Mammalia	Rodentia	Myomorpha	Muridae	Gerbillinae	Gerbillus perpallidus	0.875413	0.76	True
Mammalia	Rodentia	Myomorpha	Muridae	Gerbillinae	Gerbillus poecilops	0.875413	0.76	True
Mammalia	Rodentia	Myomorpha	Muridae	Gerbillinae	Gerbillus pyramidum	0.875413	0.76	True
Mammalia	Rodentia	Myomorpha	Muridae	Gerbillinae	Gerbillus tarabuli	0.875413	0.76	True
Mammalia	Rodentia	Myomorpha	Muridae	Gerbillinae	Meriones chengi	0.875413	0.76	True
Mammalia	Rodentia	Myomorpha	Muridae	Gerbillinae	Meriones crassus	0.875413	0.76	True
Mammalia	Rodentia	Myomorpha	Muridae	Gerbillinae	Meriones libycus	0.875413	0.76	True
Mammalia	Rodentia	Myomorpha	Muridae	Gerbillinae	Meriones meridianus	0.875413	0.76	True
Mammalia	Rodentia	Myomorpha	Muridae	Gerbillinae	Meriones persicus	0.875413	0.76	True
Mammalia	Rodentia	Myomorpha	Muridae	Gerbillinae	Meriones rex	0.875413	0.76	True
Mammalia	Rodentia	Myomorpha	Muridae	Gerbillinae	Meriones shawi	0.875413	0.76	True
Mammalia	Rodentia	Myomorpha	Muridae	Gerbillinae	Meriones tamariscinus	0.875413	0.76	True
Mammalia	Rodentia	Myomorpha	Muridae	Gerbillinae	Meriones tristrami	0.875413	0.76	True
Mammalia	Rodentia	Myomorpha	Muridae	Gerbillinae	Meriones unguiculatus	0.875413	0.76	True
Mammalia	Rodentia	Myomorpha	Muridae	Gerbillinae	Taterillus arenarius	0.875413	0.76	True
Mammalia	Rodentia	Myomorpha	Muridae	Gerbillinae	Taterillus emini	0.875413	0.76	True
Mammalia	Rodentia	Myomorpha	Muridae	Gerbillinae	Taterillus gracilis	0.875413	0.76	True
Mammalia	Rodentia	Myomorpha	Muridae	Gerbillinae	Taterillus petteri	0.875413	0.76	True
Mammalia	Rodentia	Myomorpha	Muridae	Gerbillinae	Taterillus pygargus	0.875413	0.76	True
Mammalia	Paucituberculata		Caenolestidae		Caenolestes fuliginosus	0.874573	0.76	True
Mammalia	Paucituberculata		Caenolestidae		Lestoros inca	0.874573	0.76	True
Mammalia	Paucituberculata		Caenolestidae		Rhyncholestes raphanurus	0.874573	0.76	True
Mammalia	Dasyuromorphia		Dasyuridae	Sminthopsinae	Antechinomys laniger	0.871431	0.76	True
Mammalia	Dasyuromorphia		Dasyuridae	Dasyurinae	Antechinus agilis	0.871431	0.76	True
Mammalia	Dasyuromorphia		Dasyuridae	Dasyurinae	Antechinus bellus	0.871431	0.76	True
Mammalia	Dasyuromorphia		Dasyuridae	Dasyurinae	Antechinus flavipes	0.871431	0.76	True
Mammalia	Dasyuromorphia		Dasyuridae	Dasyurinae	Antechinus godmani	0.871431	0.76	True
Mammalia	Dasyuromorphia		Dasyuridae	Dasyurinae	Antechinus leo	0.871431	0.76	True
Mammalia	Dasyuromorphia		Dasyuridae	Dasyurinae	Antechinus minimus	0.871431	0.76	True
Mammalia	Dasyuromorphia		Dasyuridae	Dasyurinae	Antechinus stuartii	0.871431	0.76	True
Mammalia	Dasyuromorphia		Dasyuridae	Dasyurinae	Antechinus swainsonii	0.871431	0.76	True
Mammalia	Dasyuromorphia		Dasyuridae	Dasyurinae	Dasycercus cristicauda	0.871431	0.76	True
Mammalia	Dasyuromorphia		Dasyuridae	Dasyurinae	Dasykaluta rosamondae	0.871431	0.76	True
Mammalia	Dasyuromorphia		Dasyuridae	Dasyurinae	Dasyuroides byrnei	0.871431	0.76	True
Mammalia	Dasyuromorphia		Dasyuridae	Dasyurinae	Dasyurus albopunctatus	0.871431	0.76	True
Mammalia	Dasyuromorphia		Dasyuridae	Dasyurinae	Dasyurus geoffroii	0.871431	0.76	True
Mammalia	Dasyuromorphia		Dasyuridae	Dasyurinae	Dasyurus hallucatus	0.871431	0.76	True
Mammalia	Dasyuromorphia		Dasyuridae	Dasyurinae	Dasyurus maculatus	0.871431	0.76	True
Mammalia	Dasyuromorphia		Dasyuridae	Dasyurinae	Dasyurus spartacus	0.871431	0.76	True
Mammalia	Dasyuromorphia		Dasyuridae	Dasyurinae	Dasyurus viverrinus	0.871431	0.76	True
Mammalia	Dasyuromorphia		Dasyuridae	Dasyurinae	Micromurexia habbema	0.871431	0.76	True
Mammalia	Dasyuromorphia		Dasyuridae		Murexchinus melanurus	0.871431	0.76	True
Mammalia	Dasyuromorphia		Dasyuridae	Dasyurinae	Murexia longicaudata	0.871431	0.76	True
Mammalia	Dasyuromorphia		Dasyuridae	Dasyurinae	Myoictis melas	0.871431	0.76	True
Mammalia	Dasyuromorphia		Dasyuridae		Neophascogale lorentzii	0.871431	0.76	True
Mammalia	Dasyuromorphia		Dasyuridae	Sminthopsinae	Ningaui ridei	0.871431	0.76	True
Mammalia	Dasyuromorphia		Dasyuridae	Sminthopsinae	Ningaui timealeyi	0.871431	0.76	True
Mammalia	Dasyuromorphia		Dasyuridae	Sminthopsinae	Ningaui yvonnae	0.871431	0.76	True
Mammalia	Dasyuromorphia		Dasyuridae	Dasyurinae	Paramurexia rothschildi	0.871431	0.76	True
Mammalia	Dasyuromorphia		Dasyuridae	Dasyurinae	Parantechinus apicalis	0.871431	0.76	True
Mammalia	Dasyuromorphia		Dasyuridae	Dasyurinae	Phascogale calura	0.871431	0.76	True
Mammalia	Dasyuromorphia		Dasyuridae	Dasyurinae	Phascogale tapoatafa	0.871431	0.76	True
Mammalia	Dasyuromorphia		Dasyuridae	Dasyurinae	Phascolosorex doriae	0.871431	0.76	True
Mammalia	Dasyuromorphia		Dasyuridae	Dasyurinae	Phascolosorex dorsalis	0.871431	0.76	True
Mammalia	Dasyuromorphia		Dasyuridae	Dasyurinae	Phascomurexia naso	0.871431	0.76	True
Mammalia	Dasyuromorphia		Dasyuridae	Sminthopsinae	Planigale gilesi	0.871431	0.76	True
Mammalia	Dasyuromorphia		Dasyuridae	Sminthopsinae	Planigale ingrami	0.871431	0.76	True
Mammalia	Dasyuromorphia		Dasyuridae	Sminthopsinae	Planigale maculata	0.871431	0.76	True
Mammalia	Dasyuromorphia		Dasyuridae	Sminthopsinae	Planigale novaeguineae	0.871431	0.76	True
Mammalia	Dasyuromorphia		Dasyuridae	Sminthopsinae	Planigale tenuirostris	0.871431	0.76	True
Mammalia	Dasyuromorphia		Dasyuridae	Dasyurinae	Pseudantechinus bilarni	0.871431	0.76	True
Mammalia	Dasyuromorphia		Dasyuridae	Dasyurinae	Pseudantechinus macdonnellensis	0.871431	0.76	True
Mammalia	Dasyuromorphia		Dasyuridae	Dasyurinae	Pseudantechinus mimulus	0.871431	0.76	True
Mammalia	Dasyuromorphia		Dasyuridae	Dasyurinae	Pseudantechinus ningbing	0.871431	0.76	True
Mammalia	Dasyuromorphia		Dasyuridae	Dasyurinae	Pseudantechinus woolleyae	0.871431	0.76	True
Mammalia	Dasyuromorphia		Dasyuridae	Dasyurinae	Sarcophilus harrisii	0.871431	0.76	True
Mammalia	Dasyuromorphia		Dasyuridae	Sminthopsinae	Sminthopsis aitkeni	0.871431	0.76	True
Mammalia	Dasyuromorphia		Dasyuridae	Sminthopsinae	Sminthopsis archeri	0.871431	0.76	True
Mammalia	Dasyuromorphia		Dasyuridae	Sminthopsinae	Sminthopsis butleri	0.871431	0.76	True
Mammalia	Dasyuromorphia		Dasyuridae	Sminthopsinae	Sminthopsis crassicaudata	0.871431	0.76	True
Mammalia	Dasyuromorphia		Dasyuridae	Sminthopsinae	Sminthopsis dolichura	0.871431	0.76	True
Mammalia	Dasyuromorphia		Dasyuridae	Sminthopsinae	Sminthopsis douglasi	0.871431	0.76	True
Mammalia	Dasyuromorphia		Dasyuridae	Sminthopsinae	Sminthopsis gilberti	0.871431	0.76	True
Mammalia	Dasyuromorphia		Dasyuridae	Sminthopsinae	Sminthopsis granulipes	0.871431	0.76	True
Mammalia	Dasyuromorphia		Dasyuridae	Sminthopsinae	Sminthopsis griseoventer	0.871431	0.76	True
Mammalia	Dasyuromorphia		Dasyuridae	Sminthopsinae	Sminthopsis hirtipes	0.871431	0.76	True
Mammalia	Dasyuromorphia		Dasyuridae	Sminthopsinae	Sminthopsis leucopus	0.871431	0.76	True
Mammalia	Dasyuromorphia		Dasyuridae	Sminthopsinae	Sminthopsis longicaudata	0.871431	0.76	True
Mammalia	Dasyuromorphia		Dasyuridae	Sminthopsinae	Sminthopsis macroura	0.871431	0.76	True
Mammalia	Dasyuromorphia		Dasyuridae	Sminthopsinae	Sminthopsis murina	0.871431	0.76	True
Mammalia	Dasyuromorphia		Dasyuridae	Sminthopsinae	Sminthopsis ooldea	0.871431	0.76	True
Mammalia	Dasyuromorphia		Dasyuridae	Sminthopsinae	Sminthopsis psammophila	0.871431	0.76	True
Mammalia	Dasyuromorphia		Dasyuridae	Sminthopsinae	Sminthopsis virginiae	0.871431	0.76	True
Mammalia	Dasyuromorphia		Dasyuridae	Sminthopsinae	Sminthopsis youngsoni	0.871431	0.76	True
Mammalia	Chiroptera	Yinpterochiroptera	Rhinolophidae		Rhinolophus acuminatus	0.862813	0.76	True
Mammalia	Chiroptera	Yinpterochiroptera	Rhinolophidae		Rhinolophus arcuatus	0.862813	0.76	True
Mammalia	Chiroptera	Yinpterochiroptera	Rhinolophidae		Rhinolophus coelophyllus	0.862813	0.76	True
Mammalia	Chiroptera	Yinpterochiroptera	Rhinolophidae		Rhinolophus creaghi	0.862813	0.76	True
Mammalia	Chiroptera	Yinpterochiroptera	Rhinolophidae		Rhinolophus euryotis	0.862813	0.76	True
Mammalia	Chiroptera	Yinpterochiroptera	Rhinolophidae		Rhinolophus formosae	0.862813	0.76	True
Mammalia	Chiroptera	Yinpterochiroptera	Rhinolophidae		Rhinolophus inops	0.862813	0.76	True
Mammalia	Chiroptera	Yinpterochiroptera	Rhinolophidae		Rhinolophus lepidus	0.862813	0.76	True
Mammalia	Chiroptera	Yinpterochiroptera	Rhinolophidae		Rhinolophus osgoodi	0.862813	0.76	True
Mammalia	Chiroptera	Yinpterochiroptera	Rhinolophidae		Rhinolophus stheno	0.862813	0.76	True
Mammalia	Chiroptera	Yinpterochiroptera	Rhinolophidae		Rhinolophus subrufus	0.862813	0.76	True
Mammalia	Perissodactyla		Rhinocerotidae		Coelodonta antiquitatis	0.86014	0.76	True
Mammalia	Perissodactyla		Rhinocerotidae		Dicerorhinus sumatrensis	0.86014	0.76	True
Mammalia	Perissodactyla		Rhinocerotidae		Diceros bicornis	0.86014	0.76	True
Mammalia	Perissodactyla		Equidae		Equus asinus	0.86014	0.76	True
Mammalia	Perissodactyla		Equidae		Equus burchellii	0.86014	0.76	True
Mammalia	Perissodactyla		Equidae		Equus grevyi	0.86014	0.76	True
Mammalia	Perissodactyla		Equidae		Equus hemionus	0.86014	0.76	True
Mammalia	Perissodactyla		Equidae		Equus kiang	0.86014	0.76	True
Mammalia	Perissodactyla		Equidae		Equus ovodovi	0.86014	0.76	True
Mammalia	Perissodactyla		Equidae		Equus przewalskii	0.86014	0.76	True
Mammalia	Perissodactyla		Equidae		Equus zebra	0.86014	0.76	True
Mammalia	Perissodactyla		Equidae		Hippidion saldiasi	0.86014	0.76	True
Mammalia	Pholidota		Manidae		Manis pentadactyla	0.86014	0.76	True
Mammalia	Pholidota		Manidae		Manis temminckii	0.86014	0.76	True
Mammalia	Pholidota		Manidae		Manis tetradactyla	0.86014	0.76	True
Mammalia	Pholidota		Manidae		Manis tricuspis	0.86014	0.76	True
Mammalia	Perissodactyla		Rhinocerotidae		Rhinoceros sondaicus	0.86014	0.76	True
Mammalia	Perissodactyla		Rhinocerotidae		Rhinoceros unicornis	0.86014	0.76	True
Mammalia	Perissodactyla		Tapiridae		Tapirus bairdii	0.86014	0.76	True
Mammalia	Perissodactyla		Tapiridae		Tapirus indicus	0.86014	0.76	True
Mammalia	Perissodactyla		Tapiridae		Tapirus pinchaque	0.86014	0.76	True
Mammalia	Perissodactyla		Tapiridae		Tapirus terrestris	0.86014	0.76	True
Mammalia	Chiroptera	Yinpterochiroptera	Hipposideridae		Hipposideros demissus	0.859664	0.76	True
Mammalia	Chiroptera	Yinpterochiroptera	Hipposideridae		Hipposideros dinops	0.859664	0.76	True
Mammalia	Chiroptera	Yinpterochiroptera	Hipposideridae		Hipposideros pomona	0.859664	0.76	True
Mammalia	Rodentia	Castorimorpha	Heteromyidae	Perognathinae	Chaetodipus arenarius	0.854562	0.76	True
Mammalia	Rodentia	Castorimorpha	Heteromyidae	Perognathinae	Chaetodipus artus	0.854562	0.76	True
Mammalia	Rodentia	Castorimorpha	Heteromyidae	Perognathinae	Chaetodipus baileyi	0.854562	0.76	True
Mammalia	Rodentia	Castorimorpha	Heteromyidae	Perognathinae	Chaetodipus californicus	0.854562	0.76	True
Mammalia	Rodentia	Castorimorpha	Heteromyidae	Perognathinae	Chaetodipus dalquesti	0.854562	0.76	True
Mammalia	Rodentia	Castorimorpha	Heteromyidae	Perognathinae	Chaetodipus eremicus	0.854562	0.76	True
Mammalia	Rodentia	Castorimorpha	Heteromyidae	Perognathinae	Chaetodipus fallax	0.854562	0.76	True
Mammalia	Rodentia	Castorimorpha	Heteromyidae	Perognathinae	Chaetodipus formosus	0.854562	0.76	True
Mammalia	Rodentia	Castorimorpha	Heteromyidae	Perognathinae	Chaetodipus goldmani	0.854562	0.76	True
Mammalia	Rodentia	Castorimorpha	Heteromyidae	Perognathinae	Chaetodipus hispidus	0.854562	0.76	True
Mammalia	Rodentia	Castorimorpha	Heteromyidae	Perognathinae	Chaetodipus intermedius	0.854562	0.76	True
Mammalia	Rodentia	Castorimorpha	Heteromyidae	Perognathinae	Chaetodipus nelsoni	0.854562	0.76	True
Mammalia	Rodentia	Castorimorpha	Heteromyidae	Perognathinae	Chaetodipus penicillatus	0.854562	0.76	True
Mammalia	Rodentia	Castorimorpha	Heteromyidae	Perognathinae	Chaetodipus pernix	0.854562	0.76	True
Mammalia	Rodentia	Castorimorpha	Heteromyidae	Perognathinae	Chaetodipus rudinoris	0.854562	0.76	True
Mammalia	Rodentia	Castorimorpha	Heteromyidae	Perognathinae	Chaetodipus spinatus	0.854562	0.76	True
Mammalia	Rodentia	Castorimorpha	Geomyidae		Cratogeomys castanops	0.854562	0.76	True
Mammalia	Rodentia	Castorimorpha	Geomyidae		Cratogeomys fulvescens	0.854562	0.76	True
Mammalia	Rodentia	Castorimorpha	Geomyidae		Cratogeomys fumosus	0.854562	0.76	True
Mammalia	Rodentia	Castorimorpha	Geomyidae		Cratogeomys goldmani	0.854562	0.76	True
Mammalia	Rodentia	Castorimorpha	Geomyidae		Cratogeomys gymnurus	0.854562	0.76	True
Mammalia	Rodentia	Castorimorpha	Geomyidae		Cratogeomys merriami	0.854562	0.76	True
Mammalia	Rodentia	Castorimorpha	Geomyidae		Cratogeomys neglectus	0.854562	0.76	True
Mammalia	Rodentia	Castorimorpha	Geomyidae		Cratogeomys planiceps	0.854562	0.76	True
Mammalia	Rodentia	Castorimorpha	Geomyidae		Cratogeomys tylorhinus	0.854562	0.76	True
Mammalia	Rodentia	Castorimorpha	Geomyidae		Cratogeomys zinseri	0.854562	0.76	True
Mammalia	Rodentia	Castorimorpha	Heteromyidae	Dipodomyinae	Dipodomys agilis	0.854562	0.76	True
Mammalia	Rodentia	Castorimorpha	Heteromyidae	Dipodomyinae	Dipodomys californicus	0.854562	0.76	True
Mammalia	Rodentia	Castorimorpha	Heteromyidae	Dipodomyinae	Dipodomys compactus	0.854562	0.76	True
Mammalia	Rodentia	Castorimorpha	Heteromyidae	Dipodomyinae	Dipodomys deserti	0.854562	0.76	True
Mammalia	Rodentia	Castorimorpha	Heteromyidae	Dipodomyinae	Dipodomys elator	0.854562	0.76	True
Mammalia	Rodentia	Castorimorpha	Heteromyidae	Dipodomyinae	Dipodomys gravipes	0.854562	0.76	True
Mammalia	Rodentia	Castorimorpha	Heteromyidae	Dipodomyinae	Dipodomys heermanni	0.854562	0.76	True
Mammalia	Rodentia	Castorimorpha	Heteromyidae	Dipodomyinae	Dipodomys ingens	0.854562	0.76	True
Mammalia	Rodentia	Castorimorpha	Heteromyidae	Dipodomyinae	Dipodomys merriami	0.854562	0.76	True
Mammalia	Rodentia	Castorimorpha	Heteromyidae	Dipodomyinae	Dipodomys microps	0.854562	0.76	True
Mammalia	Rodentia	Castorimorpha	Heteromyidae	Dipodomyinae	Dipodomys nelsoni	0.854562	0.76	True
Mammalia	Rodentia	Castorimorpha	Heteromyidae	Dipodomyinae	Dipodomys nitratoides	0.854562	0.76	True
Mammalia	Rodentia	Castorimorpha	Heteromyidae	Dipodomyinae	Dipodomys ordii	0.854562	0.76	True
Mammalia	Rodentia	Castorimorpha	Heteromyidae	Dipodomyinae	Dipodomys panamintinus	0.854562	0.76	True
Mammalia	Rodentia	Castorimorpha	Heteromyidae	Dipodomyinae	Dipodomys phillipsii	0.854562	0.76	True
Mammalia	Rodentia	Castorimorpha	Heteromyidae	Dipodomyinae	Dipodomys simulans	0.854562	0.76	True
Mammalia	Rodentia	Castorimorpha	Heteromyidae	Dipodomyinae	Dipodomys spectabilis	0.854562	0.76	True
Mammalia	Rodentia	Castorimorpha	Heteromyidae	Dipodomyinae	Dipodomys stephensi	0.854562	0.76	True
Mammalia	Rodentia	Castorimorpha	Heteromyidae	Dipodomyinae	Dipodomys venustus	0.854562	0.76	True
Mammalia	Rodentia	Castorimorpha	Geomyidae		Geomys arenarius	0.854562	0.76	True
Mammalia	Rodentia	Castorimorpha	Geomyidae		Geomys attwateri	0.854562	0.76	True
Mammalia	Rodentia	Castorimorpha	Geomyidae		Geomys breviceps	0.854562	0.76	True
Mammalia	Rodentia	Castorimorpha	Geomyidae		Geomys bursarius	0.854562	0.76	True
Mammalia	Rodentia	Castorimorpha	Geomyidae		Geomys knoxjonesi	0.854562	0.76	True
Mammalia	Rodentia	Castorimorpha	Geomyidae		Geomys personatus	0.854562	0.76	True
Mammalia	Rodentia	Castorimorpha	Geomyidae		Geomys pinetis	0.854562	0.76	True
Mammalia	Rodentia	Castorimorpha	Geomyidae		Geomys texensis	0.854562	0.76	True
Mammalia	Rodentia	Castorimorpha	Geomyidae		Geomys tropicalis	0.854562	0.76	True
Mammalia	Rodentia	Castorimorpha	Heteromyidae	Heteromyinae	Heteromys anomalus	0.854562	0.76	True
Mammalia	Rodentia	Castorimorpha	Heteromyidae	Heteromyinae	Heteromys australis	0.854562	0.76	True
Mammalia	Rodentia	Castorimorpha	Heteromyidae	Heteromyinae	Heteromys desmarestianus	0.854562	0.76	True
Mammalia	Rodentia	Castorimorpha	Heteromyidae	Heteromyinae	Heteromys gaumeri	0.854562	0.76	True
Mammalia	Rodentia	Castorimorpha	Heteromyidae	Heteromyinae	Heteromys nelsoni	0.854562	0.76	True
Mammalia	Rodentia	Castorimorpha	Heteromyidae	Heteromyinae	Heteromys oresterus	0.854562	0.76	True
Mammalia	Rodentia	Castorimorpha	Heteromyidae	Heteromyinae	Liomys adspersus	0.854562	0.76	True
Mammalia	Rodentia	Castorimorpha	Heteromyidae	Heteromyinae	Liomys irroratus	0.854562	0.76	True
Mammalia	Rodentia	Castorimorpha	Heteromyidae	Heteromyinae	Liomys pictus	0.854562	0.76	True
Mammalia	Rodentia	Castorimorpha	Heteromyidae	Heteromyinae	Liomys salvini	0.854562	0.76	True
Mammalia	Rodentia	Castorimorpha	Heteromyidae	Heteromyinae	Liomys spectabilis	0.854562	0.76	True
Mammalia	Rodentia	Castorimorpha	Heteromyidae	Dipodomyinae	Microdipodops megacephalus	0.854562	0.76	True
Mammalia	Rodentia	Castorimorpha	Heteromyidae	Dipodomyinae	Microdipodops pallidus	0.854562	0.76	True
Mammalia	Rodentia	Castorimorpha	Geomyidae		Orthogeomys cavator	0.854562	0.76	True
Mammalia	Rodentia	Castorimorpha	Geomyidae		Orthogeomys cherriei	0.854562	0.76	True
Mammalia	Rodentia	Castorimorpha	Geomyidae		Orthogeomys grandis	0.854562	0.76	True
Mammalia	Rodentia	Castorimorpha	Geomyidae		Orthogeomys heterodus	0.854562	0.76	True
Mammalia	Rodentia	Castorimorpha	Geomyidae		Orthogeomys hispidus	0.854562	0.76	True
Mammalia	Rodentia	Castorimorpha	Geomyidae		Orthogeomys underwoodi	0.854562	0.76	True
Mammalia	Rodentia	Castorimorpha	Geomyidae		Pappogeomys alcorni	0.854562	0.76	True
Mammalia	Rodentia	Castorimorpha	Geomyidae		Pappogeomys bulleri	0.854562	0.76	True
Mammalia	Rodentia	Castorimorpha	Heteromyidae	Perognathinae	Perognathus amplus	0.854562	0.76	True
Mammalia	Rodentia	Castorimorpha	Heteromyidae	Perognathinae	Perognathus fasciatus	0.854562	0.76	True
Mammalia	Rodentia	Castorimorpha	Heteromyidae	Perognathinae	Perognathus flavescens	0.854562	0.76	True
Mammalia	Rodentia	Castorimorpha	Heteromyidae	Perognathinae	Perognathus flavus	0.854562	0.76	True
Mammalia	Rodentia	Castorimorpha	Heteromyidae	Perognathinae	Perognathus inornatus	0.854562	0.76	True
Mammalia	Rodentia	Castorimorpha	Heteromyidae	Perognathinae	Perognathus longimembris	0.854562	0.76	True
Mammalia	Rodentia	Castorimorpha	Heteromyidae	Perognathinae	Perognathus merriami	0.854562	0.76	True
Mammalia	Rodentia	Castorimorpha	Heteromyidae	Perognathinae	Perognathus parvus	0.854562	0.76	True
Mammalia	Rodentia	Castorimorpha	Geomyidae		Thomomys bottae	0.854562	0.76	True
Mammalia	Rodentia	Castorimorpha	Geomyidae		Thomomys bulbivorus	0.854562	0.76	True
Mammalia	Rodentia	Castorimorpha	Geomyidae		Thomomys idahoensis	0.854562	0.76	True
Mammalia	Rodentia	Castorimorpha	Geomyidae		Thomomys mazama	0.854562	0.76	True
Mammalia	Rodentia	Castorimorpha	Geomyidae		Thomomys monticola	0.854562	0.76	True
Mammalia	Rodentia	Castorimorpha	Geomyidae		Thomomys talpoides	0.854562	0.76	True
Mammalia	Rodentia	Castorimorpha	Geomyidae		Thomomys townsendii	0.854562	0.76	True
Mammalia	Rodentia	Castorimorpha	Geomyidae		Thomomys umbrinus	0.854562	0.76	True
Mammalia	Rodentia	Castorimorpha	Geomyidae		Zygogeomys trichopus	0.854562	0.76	True
Mammalia	Chiroptera	Yinpterochiroptera	Hipposideridae		Hipposideros cineraceus	0.852323	0.76	True
Mammalia	Chiroptera	Yinpterochiroptera	Hipposideridae		Hipposideros grandis	0.852323	0.76	True
Mammalia	Chiroptera	Yinpterochiroptera	Hipposideridae		Hipposideros griffini	0.852323	0.76	True
Mammalia	Chiroptera	Yinpterochiroptera	Hipposideridae		Hipposideros khaokhouayensis	0.852323	0.76	True
Mammalia	Chiroptera	Yinpterochiroptera	Hipposideridae		Hipposideros larvatus	0.852323	0.76	True
Mammalia	Chiroptera	Yinpterochiroptera	Hipposideridae		Hipposideros lylei	0.852323	0.76	True
Mammalia	Chiroptera	Yinpterochiroptera	Hipposideridae		Hipposideros pratti	0.852323	0.76	True
Mammalia	Chiroptera	Yinpterochiroptera	Hipposideridae		Hipposideros rotalis	0.852323	0.76	True
Mammalia	Chiroptera	Yinpterochiroptera	Hipposideridae		Hipposideros scutinares	0.852323	0.76	True
Mammalia	Chiroptera	Microchiroptera	Hipposideridae		Hipposideros terasensis	0.852323	0.76	True
Mammalia	Chiroptera	Yinpterochiroptera	Rhinolophidae		Rhinolophus beddomei	0.849863	0.76	True
Mammalia	Chiroptera	Yinpterochiroptera	Rhinolophidae		Rhinolophus borneensis	0.849863	0.76	True
Mammalia	Chiroptera	Yinpterochiroptera	Rhinolophidae		Rhinolophus celebensis	0.849863	0.76	True
Mammalia	Chiroptera	Yinpterochiroptera	Rhinolophidae		Rhinolophus hipposideros	0.849863	0.76	True
Mammalia	Chiroptera	Yinpterochiroptera	Rhinolophidae		Rhinolophus luctus	0.849863	0.76	True
Mammalia	Chiroptera	Yinpterochiroptera	Rhinolophidae		Rhinolophus malayanus	0.849863	0.76	True
Mammalia	Chiroptera	Yinpterochiroptera	Rhinolophidae		Rhinolophus megaphyllus	0.849863	0.76	True
Mammalia	Chiroptera	Yinpterochiroptera	Rhinolophidae		Rhinolophus perditus	0.849863	0.76	True
Mammalia	Chiroptera	Yinpterochiroptera	Rhinolophidae		Rhinolophus philippinensis	0.849863	0.76	True
Mammalia	Chiroptera	Yinpterochiroptera	Rhinolophidae		Rhinolophus pumilus	0.849863	0.76	True
Mammalia	Chiroptera	Yinpterochiroptera	Rhinolophidae		Rhinolophus robinsoni	0.849863	0.76	True
Mammalia	Chiroptera	Yinpterochiroptera	Rhinolophidae		Rhinolophus sedulus	0.849863	0.76	True
Mammalia	Chiroptera	Yinpterochiroptera	Rhinolophidae		Rhinolophus trifoliatus	0.849863	0.76	True
Mammalia	Chiroptera	Yinpterochiroptera	Rhinolophidae		Rhinolophus virgo	0.849863	0.76	True
Mammalia	Rodentia	Myomorpha	Spalacidae	Rhizomyinae	Cannomys badius	0.846767	0.76	True
Mammalia	Rodentia	Myomorpha	Spalacidae	Myospalacinae	Eospalax baileyi	0.846767	0.76	True
Mammalia	Rodentia	Myomorpha	Spalacidae	Myospalacinae	Eospalax cansus	0.846767	0.76	True
Mammalia	Rodentia	Myomorpha	Spalacidae	Myospalacinae	Eospalax fontanierii	0.846767	0.76	True
Mammalia	Rodentia	Myomorpha	Spalacidae	Myospalacinae	Eospalax rothschildi	0.846767	0.76	True
Mammalia	Rodentia	Myomorpha	Spalacidae	Myospalacinae	Eospalax rufescens	0.846767	0.76	True
Mammalia	Rodentia	Myomorpha	Spalacidae	Myospalacinae	Eospalax smithii	0.846767	0.76	True
Mammalia	Rodentia	Myomorpha	Spalacidae	Myospalacinae	Myospalax aspalax	0.846767	0.76	True
Mammalia	Rodentia	Myomorpha	Spalacidae	Myospalacinae	Myospalax psilurus	0.846767	0.76	True
Mammalia	Rodentia	Myomorpha	Spalacidae	Spalacinae	Nannospalax ceyhanus	0.846767	0.76	True
Mammalia	Rodentia	Myomorpha	Spalacidae	Spalacinae	Nannospalax ehrenbergi	0.846767	0.76	True
Mammalia	Rodentia	Myomorpha	Spalacidae	Spalacinae	Nannospalax galili	0.846767	0.76	True
Mammalia	Rodentia	Myomorpha	Spalacidae	Spalacinae	Nannospalax golani	0.846767	0.76	True
Mammalia	Rodentia	Myomorpha	Spalacidae	Spalacinae	Nannospalax judaei	0.846767	0.76	True
Mammalia	Rodentia	Myomorpha	Spalacidae	Spalacinae	Nannospalax leucodon	0.846767	0.76	True
Mammalia	Rodentia	Myomorpha	Spalacidae	Spalacinae	Nannospalax nehringi	0.846767	0.76	True
Mammalia	Rodentia	Myomorpha	Spalacidae	Rhizomyinae	Rhizomys pruinosus	0.846767	0.76	True
Mammalia	Rodentia	Myomorpha	Spalacidae	Rhizomyinae	Rhizomys sinensis	0.846767	0.76	True
Mammalia	Rodentia	Myomorpha	Spalacidae	Spalacinae	Spalax arenarius	0.846767	0.76	True
Mammalia	Rodentia	Myomorpha	Spalacidae	Spalacinae	Spalax carmeli	0.846767	0.76	True
Mammalia	Rodentia	Myomorpha	Spalacidae	Spalacinae	Spalax graecus	0.846767	0.76	True
Mammalia	Rodentia	Myomorpha	Spalacidae	Spalacinae	Spalax microphthalmus	0.846767	0.76	True
Mammalia	Rodentia	Myomorpha	Spalacidae	Spalacinae	Spalax zemni	0.846767	0.76	True
Mammalia	Rodentia	Myomorpha	Spalacidae	Tachyoryctinae	Tachyoryctes splendens	0.846767	0.76	True
Mammalia	Rodentia	Myomorpha	Platacanthomyidae		Typhlomys cinereus	0.846767	0.76	True
Mammalia	Chiroptera	Yinpterochiroptera	Rhinolophidae		Rhinolophus alcyone	0.844476	0.76	True
Mammalia	Chiroptera	Yinpterochiroptera	Rhinolophidae		Rhinolophus blasii	0.844476	0.76	True
Mammalia	Chiroptera	Yinpterochiroptera	Rhinolophidae		Rhinolophus capensis	0.844476	0.76	True
Mammalia	Chiroptera	Yinpterochiroptera	Rhinolophidae		Rhinolophus clivosus	0.844476	0.76	True
Mammalia	Chiroptera	Yinpterochiroptera	Rhinolophidae		Rhinolophus darlingi	0.844476	0.76	True
Mammalia	Chiroptera	Yinpterochiroptera	Rhinolophidae		Rhinolophus denti	0.844476	0.76	True
Mammalia	Chiroptera	Yinpterochiroptera	Rhinolophidae		Rhinolophus eloquens	0.844476	0.76	True
Mammalia	Chiroptera	Yinpterochiroptera	Rhinolophidae		Rhinolophus euryale	0.844476	0.76	True
Mammalia	Chiroptera	Yinpterochiroptera	Rhinolophidae		Rhinolophus fumigatus	0.844476	0.76	True
Mammalia	Chiroptera	Yinpterochiroptera	Rhinolophidae		Rhinolophus hildebrandti	0.844476	0.76	True
Mammalia	Chiroptera	Yinpterochiroptera	Rhinolophidae		Rhinolophus landeri	0.844476	0.76	True
Mammalia	Chiroptera	Yinpterochiroptera	Rhinolophidae		Rhinolophus maclaudi	0.844476	0.76	True
Mammalia	Chiroptera	Yinpterochiroptera	Rhinolophidae		Rhinolophus marshalli	0.844476	0.76	True
Mammalia	Chiroptera	Yinpterochiroptera	Rhinolophidae		Rhinolophus mehelyi	0.844476	0.76	True
Mammalia	Chiroptera	Yinpterochiroptera	Rhinolophidae		Rhinolophus paradoxolophus	0.844476	0.76	True
Mammalia	Chiroptera	Yinpterochiroptera	Rhinolophidae		Rhinolophus ruwenzorii	0.844476	0.76	True
Mammalia	Chiroptera	Yinpterochiroptera	Rhinolophidae		Rhinolophus siamensis	0.844476	0.76	True
Mammalia	Chiroptera	Yinpterochiroptera	Rhinolophidae		Rhinolophus simulator	0.844476	0.76	True
Mammalia	Chiroptera	Yinpterochiroptera	Rhinolophidae		Rhinolophus swinnyi	0.844476	0.76	True
Mammalia	Rodentia	Myomorpha	Cricetidae	Sigmodontinae	Aegialomys xanthaeolus	0.837008	0.76	True
Mammalia	Rodentia	Myomorpha	Cricetidae	Sigmodontinae	Amphinectomys savamis	0.837008	0.76	True
Mammalia	Rodentia	Myomorpha	Cricetidae	Sigmodontinae	Cerradomys goytaca	0.837008	0.76	True
Mammalia	Rodentia	Myomorpha	Cricetidae	Sigmodontinae	Cerradomys langguthi	0.837008	0.76	True
Mammalia	Rodentia	Myomorpha	Cricetidae	Sigmodontinae	Cerradomys maracajuensis	0.837008	0.76	True
Mammalia	Rodentia	Myomorpha	Cricetidae	Sigmodontinae	Cerradomys marinhus	0.837008	0.76	True
Mammalia	Rodentia	Myomorpha	Cricetidae	Sigmodontinae	Cerradomys scotti	0.837008	0.76	True
Mammalia	Rodentia	Myomorpha	Cricetidae	Sigmodontinae	Cerradomys subflavus	0.837008	0.76	True
Mammalia	Rodentia	Myomorpha	Cricetidae	Sigmodontinae	Cerradomys vivoi	0.837008	0.76	True
Mammalia	Rodentia	Myomorpha	Cricetidae	Sigmodontinae	Drymoreomys albimaculatus	0.837008	0.76	True
Mammalia	Rodentia	Myomorpha	Cricetidae	Sigmodontinae	Eremoryzomys polius	0.837008	0.76	True
Mammalia	Rodentia	Myomorpha	Cricetidae	Sigmodontinae	Euryoryzomys emmonsae	0.837008	0.76	True
Mammalia	Rodentia	Myomorpha	Cricetidae	Sigmodontinae	Euryoryzomys lamia	0.837008	0.76	True
Mammalia	Rodentia	Myomorpha	Cricetidae	Sigmodontinae	Euryoryzomys macconnelli	0.837008	0.76	True
Mammalia	Rodentia	Myomorpha	Cricetidae	Sigmodontinae	Euryoryzomys nitidus	0.837008	0.76	True
Mammalia	Rodentia	Myomorpha	Cricetidae	Sigmodontinae	Euryoryzomys russatus	0.837008	0.76	True
Mammalia	Rodentia	Myomorpha	Cricetidae	Sigmodontinae	Handleyomys alfaroi	0.837008	0.76	True
Mammalia	Rodentia	Myomorpha	Cricetidae	Sigmodontinae	Handleyomys chapmani	0.837008	0.76	True
Mammalia	Rodentia	Myomorpha	Cricetidae	Sigmodontinae	Handleyomys intectus	0.837008	0.76	True
Mammalia	Rodentia	Myomorpha	Cricetidae	Sigmodontinae	Handleyomys melanotis	0.837008	0.76	True
Mammalia	Rodentia	Myomorpha	Cricetidae	Sigmodontinae	Handleyomys rostratus	0.837008	0.76	True
Mammalia	Rodentia	Myomorpha	Cricetidae	Sigmodontinae	Handleyomys saturatior	0.837008	0.76	True
Mammalia	Rodentia	Myomorpha	Cricetidae	Sigmodontinae	Holochilus brasiliensis	0.837008	0.76	True
Mammalia	Rodentia	Myomorpha	Cricetidae	Sigmodontinae	Holochilus chacarius	0.837008	0.76	True
Mammalia	Rodentia	Myomorpha	Cricetidae	Sigmodontinae	Holochilus sciureus	0.837008	0.76	True
Mammalia	Rodentia	Myomorpha	Cricetidae	Sigmodontinae	Hylaeamys laticeps	0.837008	0.76	True
Mammalia	Rodentia	Myomorpha	Cricetidae	Sigmodontinae	Hylaeamys megacephalus	0.837008	0.76	True
Mammalia	Rodentia	Myomorpha	Cricetidae	Sigmodontinae	Hylaeamys perenensis	0.837008	0.76	True
Mammalia	Rodentia	Myomorpha	Cricetidae	Sigmodontinae	Hylaeamys yunganus	0.837008	0.76	True
Mammalia	Rodentia	Myomorpha	Cricetidae	Sigmodontinae	Lundomys molitor	0.837008	0.76	True
Mammalia	Rodentia	Myomorpha	Cricetidae	Sigmodontinae	Melanomys caliginosus	0.837008	0.76	True
Mammalia	Rodentia	Myomorpha	Cricetidae	Sigmodontinae	Microakodontomys transitorius	0.837008	0.76	True
Mammalia	Rodentia	Myomorpha	Cricetidae	Sigmodontinae	Microryzomys minutus	0.837008	0.76	True
Mammalia	Rodentia	Myomorpha	Cricetidae	Sigmodontinae	Nectomys apicalis	0.837008	0.76	True
Mammalia	Rodentia	Myomorpha	Cricetidae	Sigmodontinae	Nectomys squamipes	0.837008	0.76	True
Mammalia	Rodentia	Myomorpha	Cricetidae	Sigmodontinae	Nesoryzomys fernandinae	0.837008	0.76	True
Mammalia	Rodentia	Myomorpha	Cricetidae	Sigmodontinae	Nesoryzomys narboroughi	0.837008	0.76	True
Mammalia	Rodentia	Myomorpha	Cricetidae	Sigmodontinae	Nesoryzomys swarthi	0.837008	0.76	True
Mammalia	Rodentia	Myomorpha	Cricetidae	Sigmodontinae	Oecomys auyantepui	0.837008	0.76	True
Mammalia	Rodentia	Myomorpha	Cricetidae	Sigmodontinae	Oecomys bicolor	0.837008	0.76	True
Mammalia	Rodentia	Myomorpha	Cricetidae	Sigmodontinae	Oecomys catherinae	0.837008	0.76	True
Mammalia	Rodentia	Myomorpha	Cricetidae	Sigmodontinae	Oecomys cleberi	0.837008	0.76	True
Mammalia	Rodentia	Myomorpha	Cricetidae	Sigmodontinae	Oecomys concolor	0.837008	0.76	True
Mammalia	Rodentia	Myomorpha	Cricetidae	Sigmodontinae	Oecomys mamorae	0.837008	0.76	True
Mammalia	Rodentia	Myomorpha	Cricetidae	Sigmodontinae	Oecomys paricola	0.837008	0.76	True
Mammalia	Rodentia	Myomorpha	Cricetidae	Sigmodontinae	Oecomys rex	0.837008	0.76	True
Mammalia	Rodentia	Myomorpha	Cricetidae	Sigmodontinae	Oecomys roberti	0.837008	0.76	True
Mammalia	Rodentia	Myomorpha	Cricetidae	Sigmodontinae	Oecomys rutilus	0.837008	0.76	True
Mammalia	Rodentia	Myomorpha	Cricetidae	Sigmodontinae	Oecomys superans	0.837008	0.76	True
Mammalia	Rodentia	Myomorpha	Cricetidae	Sigmodontinae	Oecomys trinitatis	0.837008	0.76	True
Mammalia	Rodentia	Myomorpha	Cricetidae	Sigmodontinae	Oligoryzomys andinus	0.837008	0.76	True
Mammalia	Rodentia	Myomorpha	Cricetidae	Sigmodontinae	Oligoryzomys brendae	0.837008	0.76	True
Mammalia	Rodentia	Myomorpha	Cricetidae	Sigmodontinae	Oligoryzomys chacoensis	0.837008	0.76	True
Mammalia	Rodentia	Myomorpha	Cricetidae	Sigmodontinae	Oligoryzomys delticola	0.837008	0.76	True
Mammalia	Rodentia	Myomorpha	Cricetidae	Sigmodontinae	Oligoryzomys destructor	0.837008	0.76	True
Mammalia	Rodentia	Myomorpha	Cricetidae	Sigmodontinae	Oligoryzomys eliurus	0.837008	0.76	True
Mammalia	Rodentia	Myomorpha	Cricetidae	Sigmodontinae	Oligoryzomys flavescens	0.837008	0.76	True
Mammalia	Rodentia	Myomorpha	Cricetidae	Sigmodontinae	Oligoryzomys fornesi	0.837008	0.76	True
Mammalia	Rodentia	Myomorpha	Cricetidae	Sigmodontinae	Oligoryzomys fulvescens	0.837008	0.76	True
Mammalia	Rodentia	Myomorpha	Cricetidae	Sigmodontinae	Oligoryzomys longicaudatus	0.837008	0.76	True
Mammalia	Rodentia	Myomorpha	Cricetidae	Sigmodontinae	Oligoryzomys magellanicus	0.837008	0.76	True
Mammalia	Rodentia	Myomorpha	Cricetidae	Sigmodontinae	Oligoryzomys messorius	0.837008	0.76	True
Mammalia	Rodentia	Myomorpha	Cricetidae	Sigmodontinae	Oligoryzomys microtis	0.837008	0.76	True
Mammalia	Rodentia	Myomorpha	Cricetidae	Sigmodontinae	Oligoryzomys moojeni	0.837008	0.76	True
Mammalia	Rodentia	Myomorpha	Cricetidae	Sigmodontinae	Oligoryzomys nigripes	0.837008	0.76	True
Mammalia	Rodentia	Myomorpha	Cricetidae	Sigmodontinae	Oligoryzomys stramineus	0.837008	0.76	True
Mammalia	Rodentia	Myomorpha	Cricetidae	Sigmodontinae	Oligoryzomys vegetus	0.837008	0.76	True
Mammalia	Rodentia	Myomorpha	Cricetidae	Sigmodontinae	Oreoryzomys balneator	0.837008	0.76	True
Mammalia	Rodentia	Myomorpha	Cricetidae	Sigmodontinae	Oryzomys couesi	0.837008	0.76	True
Mammalia	Rodentia	Myomorpha	Cricetidae	Sigmodontinae	Oryzomys mexicanus	0.837008	0.76	True
Mammalia	Rodentia	Myomorpha	Cricetidae	Sigmodontinae	Oryzomys palustris	0.837008	0.76	True
Mammalia	Rodentia	Myomorpha	Cricetidae	Sigmodontinae	Pseudoryzomys simplex	0.837008	0.76	True
Mammalia	Rodentia	Myomorpha	Cricetidae	Sigmodontinae	Sigmodontomys alfari	0.837008	0.76	True
Mammalia	Rodentia	Myomorpha	Cricetidae	Sigmodontinae	Sigmodontomys aphrastus	0.837008	0.76	True
Mammalia	Rodentia	Myomorpha	Cricetidae	Sigmodontinae	Sooretamys angouya	0.837008	0.76	True
Mammalia	Rodentia	Myomorpha	Cricetidae	Sigmodontinae	Transandinomys bolivaris	0.837008	0.76	True
Mammalia	Rodentia	Myomorpha	Cricetidae	Sigmodontinae	Transandinomys talamancae	0.837008	0.76	True
Mammalia	Rodentia	Myomorpha	Cricetidae	Sigmodontinae	Zygodontomys brevicauda	0.837008	0.76	True
Mammalia	Rodentia	Myomorpha	Cricetidae	Sigmodontinae	Zygodontomys cherriei	0.837008	0.76	True
Mammalia	Rodentia	Myomorpha	Calomyscidae		Calomyscus bailwardi	0.830803	0.76	True
Mammalia	Rodentia	Myomorpha	Calomyscidae		Calomyscus baluchi	0.830803	0.76	True
Mammalia	Rodentia	Myomorpha	Calomyscidae		Calomyscus hotsoni	0.830803	0.76	True
Mammalia	Rodentia	Myomorpha	Calomyscidae		Calomyscus mystax	0.830803	0.76	True
Mammalia	Rodentia	Myomorpha	Nesomyidae	Cricetomyinae	Beamys hindei	0.829663	0.76	True
Mammalia	Rodentia	Myomorpha	Nesomyidae	Nesomyinae	Brachytarsomys albicauda	0.829663	0.76	True
Mammalia	Rodentia	Myomorpha	Nesomyidae	Nesomyinae	Brachyuromys betsileoensis	0.829663	0.76	True
Mammalia	Rodentia	Myomorpha	Nesomyidae	Nesomyinae	Brachyuromys ramirohitra	0.829663	0.76	True
Mammalia	Rodentia	Myomorpha	Nesomyidae	Cricetomyinae	Cricetomys ansorgei	0.829663	0.76	True
Mammalia	Rodentia	Myomorpha	Nesomyidae	Cricetomyinae	Cricetomys emini	0.829663	0.76	True
Mammalia	Rodentia	Myomorpha	Nesomyidae	Cricetomyinae	Cricetomys gambianus	0.829663	0.76	True
Mammalia	Rodentia	Myomorpha	Nesomyidae	Delanymyinae	Delanymys brooksi	0.829663	0.76	True
Mammalia	Rodentia	Myomorpha	Nesomyidae	Dendromurinae	Dendromus insignis	0.829663	0.76	True
Mammalia	Rodentia	Myomorpha	Nesomyidae	Dendromurinae	Dendromus melanotis	0.829663	0.76	True
Mammalia	Rodentia	Myomorpha	Nesomyidae	Dendromurinae	Dendromus mesomelas	0.829663	0.76	True
Mammalia	Rodentia	Myomorpha	Nesomyidae	Dendromurinae	Dendromus mystacalis	0.829663	0.76	True
Mammalia	Rodentia	Myomorpha	Nesomyidae	Dendromurinae	Dendromus nyasae	0.829663	0.76	True
Mammalia	Rodentia	Myomorpha	Nesomyidae	Dendromurinae	Dendromus nyikae	0.829663	0.76	True
Mammalia	Rodentia	Myomorpha	Nesomyidae	Nesomyinae	Eliurus antsingy	0.829663	0.76	True
Mammalia	Rodentia	Myomorpha	Nesomyidae	Nesomyinae	Eliurus ellermani	0.829663	0.76	True
Mammalia	Rodentia	Myomorpha	Nesomyidae	Nesomyinae	Eliurus grandidieri	0.829663	0.76	True
Mammalia	Rodentia	Myomorpha	Nesomyidae	Nesomyinae	Eliurus majori	0.829663	0.76	True
Mammalia	Rodentia	Myomorpha	Nesomyidae	Nesomyinae	Eliurus minor	0.829663	0.76	True
Mammalia	Rodentia	Myomorpha	Nesomyidae	Nesomyinae	Eliurus myoxinus	0.829663	0.76	True
Mammalia	Rodentia	Myomorpha	Nesomyidae	Nesomyinae	Eliurus tanala	0.829663	0.76	True
Mammalia	Rodentia	Myomorpha	Nesomyidae	Nesomyinae	Eliurus webbi	0.829663	0.76	True
Mammalia	Rodentia	Myomorpha	Nesomyidae	Nesomyinae	Gymnuromys roberti	0.829663	0.76	True
Mammalia	Rodentia	Myomorpha	Nesomyidae	Nesomyinae	Hypogeomys antimena	0.829663	0.76	True
Mammalia	Rodentia	Myomorpha	Nesomyidae	Nesomyinae	Macrotarsomys bastardi	0.829663	0.76	True
Mammalia	Rodentia	Myomorpha	Nesomyidae	Nesomyinae	Macrotarsomys ingens	0.829663	0.76	True
Mammalia	Rodentia	Myomorpha	Nesomyidae	Dendromurinae	Malacothrix typica	0.829663	0.76	True
Mammalia	Rodentia	Myomorpha	Nesomyidae	Nesomyinae	Monticolomys koopmani	0.829663	0.76	True
Mammalia	Rodentia	Myomorpha	Nesomyidae	Mystromyinae	Mystromys albicaudatus	0.829663	0.76	True
Mammalia	Rodentia	Myomorpha	Nesomyidae	Nesomyinae	Nesomys audeberti	0.829663	0.76	True
Mammalia	Rodentia	Myomorpha	Nesomyidae	Nesomyinae	Nesomys rufus	0.829663	0.76	True
Mammalia	Rodentia	Myomorpha	Nesomyidae	Petromyscinae	Petromyscus collinus	0.829663	0.76	True
Mammalia	Rodentia	Myomorpha	Nesomyidae	Petromyscinae	Petromyscus monticularis	0.829663	0.76	True
Mammalia	Rodentia	Myomorpha	Nesomyidae	Cricetomyinae	Saccostomus campestris	0.829663	0.76	True
Mammalia	Rodentia	Myomorpha	Nesomyidae	Dendromurinae	Steatomys krebsii	0.829663	0.76	True
Mammalia	Rodentia	Myomorpha	Nesomyidae	Dendromurinae	Steatomys parvus	0.829663	0.76	True
Mammalia	Rodentia	Myomorpha	Nesomyidae	Nesomyinae	Voalavo gymnocaudus	0.829663	0.76	True
Mammalia	Chiroptera	Yangochiroptera	Emballonuridae	Emballonurinae	Balantiopteryx infusca	0.828449	0.76	True
Mammalia	Chiroptera	Yangochiroptera	Emballonuridae	Emballonurinae	Balantiopteryx io	0.828449	0.76	True
Mammalia	Chiroptera	Yangochiroptera	Emballonuridae	Emballonurinae	Balantiopteryx plicata	0.828449	0.76	True
Mammalia	Chiroptera	Yangochiroptera	Emballonuridae	Emballonurinae	Centronycteris centralis	0.828449	0.76	True
Mammalia	Chiroptera	Yangochiroptera	Emballonuridae	Emballonurinae	Centronycteris maximiliani	0.828449	0.76	True
Mammalia	Chiroptera	Yangochiroptera	Emballonuridae	Emballonurinae	Coleura afra	0.828449	0.76	True
Mammalia	Chiroptera	Yangochiroptera	Emballonuridae	Emballonurinae	Coleura seychellensis	0.828449	0.76	True
Mammalia	Chiroptera	Yangochiroptera	Emballonuridae	Emballonurinae	Cormura brevirostris	0.828449	0.76	True
Mammalia	Chiroptera	Yangochiroptera	Emballonuridae	Emballonurinae	Cyttarops alecto	0.828449	0.76	True
Mammalia	Chiroptera	Yangochiroptera	Emballonuridae	Emballonurinae	Diclidurus albus	0.828449	0.76	True
Mammalia	Chiroptera	Yangochiroptera	Emballonuridae	Emballonurinae	Diclidurus ingens	0.828449	0.76	True
Mammalia	Chiroptera	Yangochiroptera	Emballonuridae	Emballonurinae	Diclidurus isabellus	0.828449	0.76	True
Mammalia	Chiroptera	Yangochiroptera	Emballonuridae	Emballonurinae	Diclidurus scutatus	0.828449	0.76	True
Mammalia	Chiroptera	Yangochiroptera	Emballonuridae	Emballonurinae	Emballonura alecto	0.828449	0.76	True
Mammalia	Chiroptera	Yangochiroptera	Emballonuridae	Emballonurinae	Emballonura atrata	0.828449	0.76	True
Mammalia	Chiroptera	Yangochiroptera	Emballonuridae	Emballonurinae	Emballonura beccarii	0.828449	0.76	True
Mammalia	Chiroptera	Yangochiroptera	Emballonuridae	Emballonurinae	Emballonura dianae	0.828449	0.76	True
Mammalia	Chiroptera	Yangochiroptera	Emballonuridae	Emballonurinae	Emballonura monticola	0.828449	0.76	True
Mammalia	Chiroptera	Yangochiroptera	Emballonuridae	Emballonurinae	Emballonura raffrayana	0.828449	0.76	True
Mammalia	Chiroptera	Yangochiroptera	Emballonuridae	Emballonurinae	Emballonura semicaudata	0.828449	0.76	True
Mammalia	Chiroptera	Yangochiroptera	Emballonuridae	Emballonurinae	Emballonura serii	0.828449	0.76	True
Mammalia	Chiroptera	Yangochiroptera	Emballonuridae	Emballonurinae	Emballonura tiavato	0.828449	0.76	True
Mammalia	Chiroptera	Yangochiroptera	Emballonuridae	Emballonurinae	Mosia nigrescens	0.828449	0.76	True
Mammalia	Chiroptera	Yangochiroptera	Nycteridae		Nycteris arge	0.828449	0.76	True
Mammalia	Chiroptera	Yangochiroptera	Nycteridae		Nycteris grandis	0.828449	0.76	True
Mammalia	Chiroptera	Yangochiroptera	Nycteridae		Nycteris hispida	0.828449	0.76	True
Mammalia	Chiroptera	Yangochiroptera	Nycteridae		Nycteris javanica	0.828449	0.76	True
Mammalia	Chiroptera	Yangochiroptera	Nycteridae		Nycteris macrotis	0.828449	0.76	True
Mammalia	Chiroptera	Yangochiroptera	Nycteridae		Nycteris thebaica	0.828449	0.76	True
Mammalia	Chiroptera	Yangochiroptera	Nycteridae		Nycteris tragata	0.828449	0.76	True
Mammalia	Chiroptera	Yangochiroptera	Emballonuridae	Emballonurinae	Peropteryx kappleri	0.828449	0.76	True
Mammalia	Chiroptera	Yangochiroptera	Emballonuridae	Emballonurinae	Peropteryx leucoptera	0.828449	0.76	True
Mammalia	Chiroptera	Yangochiroptera	Emballonuridae	Emballonurinae	Peropteryx macrotis	0.828449	0.76	True
Mammalia	Chiroptera	Yangochiroptera	Emballonuridae	Emballonurinae	Peropteryx trinitatis	0.828449	0.76	True
Mammalia	Chiroptera	Yangochiroptera	Emballonuridae	Emballonurinae	Rhynchonycteris naso	0.828449	0.76	True
Mammalia	Chiroptera	Yangochiroptera	Emballonuridae	Taphozoinae	Saccolaimus flaviventris	0.828449	0.76	True
Mammalia	Chiroptera	Yangochiroptera	Emballonuridae	Taphozoinae	Saccolaimus saccolaimus	0.828449	0.76	True
Mammalia	Chiroptera	Yangochiroptera	Emballonuridae	Emballonurinae	Saccopteryx bilineata	0.828449	0.76	True
Mammalia	Chiroptera	Yangochiroptera	Emballonuridae	Emballonurinae	Saccopteryx canescens	0.828449	0.76	True
Mammalia	Chiroptera	Yangochiroptera	Emballonuridae	Emballonurinae	Saccopteryx gymnura	0.828449	0.76	True
Mammalia	Chiroptera	Yangochiroptera	Emballonuridae	Emballonurinae	Saccopteryx leptura	0.828449	0.76	True
Mammalia	Chiroptera	Yangochiroptera	Emballonuridae	Taphozoinae	Taphozous australis	0.828449	0.76	True
Mammalia	Chiroptera	Yangochiroptera	Emballonuridae	Taphozoinae	Taphozous georgianus	0.828449	0.76	True
Mammalia	Chiroptera	Yangochiroptera	Emballonuridae	Taphozoinae	Taphozous hildegardeae	0.828449	0.76	True
Mammalia	Chiroptera	Yangochiroptera	Emballonuridae	Taphozoinae	Taphozous hilli	0.828449	0.76	True
Mammalia	Chiroptera	Yangochiroptera	Emballonuridae	Taphozoinae	Taphozous longimanus	0.828449	0.76	True
Mammalia	Chiroptera	Yangochiroptera	Emballonuridae	Taphozoinae	Taphozous mauritianus	0.828449	0.76	True
Mammalia	Chiroptera	Yangochiroptera	Emballonuridae	Taphozoinae	Taphozous melanopogon	0.828449	0.76	True
Mammalia	Chiroptera	Yangochiroptera	Emballonuridae	Taphozoinae	Taphozous nudiventris	0.828449	0.76	True
Mammalia	Rodentia	Castorimorpha	Castoridae		Castor canadensis	0.823966	0.76	True
Mammalia	Rodentia	Castorimorpha	Castoridae		Castor fiber	0.823966	0.76	True
Mammalia	Scandentia		Tupaiidae		Anathana ellioti	0.815192	0.76	True
Mammalia	Dermoptera		Cynocephalidae		Cynocephalus volans	0.815192	0.76	True
Mammalia	Scandentia		Tupaiidae		Dendrogale melanura	0.815192	0.76	True
Mammalia	Scandentia		Tupaiidae		Dendrogale murina	0.815192	0.76	True
Mammalia	Dermoptera		Cynocephalidae		Galeopterus variegatus	0.815192	0.76	True
Mammalia	Scandentia		Tupaiidae		Tupaia chrysogaster	0.815192	0.76	True
Mammalia	Scandentia		Tupaiidae		Tupaia dorsalis	0.815192	0.76	True
Mammalia	Scandentia		Tupaiidae		Tupaia glis	0.815192	0.76	True
Mammalia	Scandentia		Tupaiidae		Tupaia gracilis	0.815192	0.76	True
Mammalia	Scandentia		Tupaiidae		Tupaia javanica	0.815192	0.76	True
Mammalia	Scandentia		Tupaiidae		Tupaia longipes	0.815192	0.76	True
Mammalia	Scandentia		Tupaiidae		Tupaia minor	0.815192	0.76	True
Mammalia	Scandentia		Tupaiidae		Tupaia moellendorffi	0.815192	0.76	True
Mammalia	Scandentia		Tupaiidae		Tupaia montana	0.815192	0.76	True
Mammalia	Scandentia		Tupaiidae		Tupaia nicobarica	0.815192	0.76	True
Mammalia	Scandentia		Tupaiidae		Tupaia palawanensis	0.815192	0.76	True
Mammalia	Scandentia		Tupaiidae		Tupaia picta	0.815192	0.76	True
Mammalia	Scandentia		Tupaiidae		Tupaia splendidula	0.815192	0.76	True
Mammalia	Scandentia		Tupaiidae		Tupaia tana	0.815192	0.76	True
Mammalia	Scandentia		Tupaiidae		Urogale everetti	0.815192	0.76	True
Mammalia	Primates	Haplorrhini	Tarsiidae		Carlito syrichta	0.810482	0.76	True
Mammalia	Primates	Haplorrhini	Tarsiidae		Tarsius bancanus	0.810482	0.76	True
Mammalia	Primates	Haplorrhini	Tarsiidae		Tarsius dentatus	0.810482	0.76	True
Mammalia	Primates	Haplorrhini	Tarsiidae		Tarsius fuscus	0.810482	0.76	True
Mammalia	Primates	Haplorrhini	Tarsiidae		Tarsius lariang	0.810482	0.76	True
Mammalia	Primates	Haplorrhini	Tarsiidae		Tarsius sangirensis	0.810482	0.76	True
Mammalia	Primates	Haplorrhini	Tarsiidae		Tarsius tarsier	0.810482	0.76	True
Mammalia	Primates	Haplorrhini	Tarsiidae		Tarsius wallacei	0.810482	0.76	True
Mammalia	Scandentia		Ptilocercidae		Ptilocercus lowii	0.810286	0.76	True
Mammalia	Rodentia	Myomorpha	Cricetidae	Tylomyinae	Nyctomys sumichrasti	0.807438	0.76	True
Mammalia	Rodentia	Myomorpha	Cricetidae	Tylomyinae	Otonyctomys hatti	0.807438	0.76	True
Mammalia	Rodentia	Myomorpha	Cricetidae	Tylomyinae	Ototylomys phyllotis	0.807438	0.76	True
Mammalia	Rodentia	Myomorpha	Cricetidae	Tylomyinae	Tylomys nudicaudus	0.807438	0.76	True
Mammalia	Rodentia	Myomorpha	Cricetidae	Tylomyinae	Tylomys watsoni	0.807438	0.76	True
Mammalia	Rodentia	Myomorpha	Cricetidae	Sigmodontinae	Mindomys hammondi	0.794568	0.76	True
Mammalia	Rodentia	Hystricomorpha	Ctenodactylidae		Ctenodactylus gundi	0.785513	0.76	True
Mammalia	Rodentia	Hystricomorpha	Ctenodactylidae		Ctenodactylus vali	0.785513	0.76	True
Mammalia	Rodentia	Hystricomorpha	Diatomyidae		Laonastes aenigmamus	0.785513	0.76	True
Mammalia	Rodentia	Hystricomorpha	Ctenodactylidae		Massoutiera mzabi	0.785513	0.76	True
Mammalia	Rodentia	Myomorpha	Cricetidae	Arvicolinae	Dinaromys bogdanovi	0.78542	0.76	True
Mammalia	Rodentia	Myomorpha	Cricetidae	Arvicolinae	Lemmiscus curtatus	0.78542	0.76	True
Mammalia	Rodentia	Myomorpha	Cricetidae	Arvicolinae	Neofiber alleni	0.78542	0.76	True
Mammalia	Rodentia	Myomorpha	Cricetidae	Arvicolinae	Arborimus albipes	0.779365	0.76	True
Mammalia	Rodentia	Myomorpha	Cricetidae	Arvicolinae	Arborimus longicaudus	0.779365	0.76	True
Mammalia	Rodentia	Myomorpha	Cricetidae	Arvicolinae	Arborimus pomo	0.779365	0.76	True
Mammalia	Rodentia	Myomorpha	Cricetidae	Arvicolinae	Blanfordimys afghanus	0.779365	0.76	True
Mammalia	Rodentia	Myomorpha	Cricetidae	Arvicolinae	Blanfordimys bucharensis	0.779365	0.76	True
Mammalia	Rodentia	Myomorpha	Cricetidae	Arvicolinae	Dicrostonyx groenlandicus	0.779365	0.76	True
Mammalia	Rodentia	Myomorpha	Cricetidae	Arvicolinae	Dicrostonyx hudsonius	0.779365	0.76	True
Mammalia	Rodentia	Myomorpha	Cricetidae	Arvicolinae	Dicrostonyx richardsoni	0.779365	0.76	True
Mammalia	Rodentia	Myomorpha	Cricetidae	Arvicolinae	Dicrostonyx torquatus	0.779365	0.76	True
Mammalia	Rodentia	Myomorpha	Cricetidae	Arvicolinae	Ellobius fuscocapillus	0.779365	0.76	True
Mammalia	Rodentia	Myomorpha	Cricetidae	Arvicolinae	Ellobius lutescens	0.779365	0.76	True
Mammalia	Rodentia	Myomorpha	Cricetidae	Arvicolinae	Ellobius talpinus	0.779365	0.76	True
Mammalia	Rodentia	Myomorpha	Cricetidae	Arvicolinae	Ellobius tancrei	0.779365	0.76	True
Mammalia	Rodentia	Myomorpha	Cricetidae	Arvicolinae	Eolagurus luteus	0.779365	0.76	True
Mammalia	Rodentia	Myomorpha	Cricetidae	Arvicolinae	Eolagurus przewalskii	0.779365	0.76	True
Mammalia	Rodentia	Myomorpha	Cricetidae	Arvicolinae	Lagurus lagurus	0.779365	0.76	True
Mammalia	Rodentia	Myomorpha	Cricetidae	Arvicolinae	Myopus schisticolor	0.779365	0.76	True
Mammalia	Rodentia	Myomorpha	Cricetidae	Arvicolinae	Neodon clarkei	0.779365	0.76	True
Mammalia	Rodentia	Myomorpha	Cricetidae	Arvicolinae	Neodon fuscus	0.779365	0.76	True
Mammalia	Rodentia	Myomorpha	Cricetidae	Arvicolinae	Neodon irene	0.779365	0.76	True
Mammalia	Rodentia	Myomorpha	Cricetidae	Arvicolinae	Neodon juldaschi	0.779365	0.76	True
Mammalia	Rodentia	Myomorpha	Cricetidae	Arvicolinae	Neodon leucurus	0.779365	0.76	True
Mammalia	Rodentia	Myomorpha	Cricetidae	Arvicolinae	Neodon sikimensis	0.779365	0.76	True
Mammalia	Rodentia	Myomorpha	Cricetidae	Arvicolinae	Ondatra zibethicus	0.779365	0.76	True
Mammalia	Rodentia	Myomorpha	Cricetidae	Arvicolinae	Phenacomys intermedius	0.779365	0.76	True
Mammalia	Rodentia	Myomorpha	Cricetidae	Arvicolinae	Phenacomys ungava	0.779365	0.76	True
Mammalia	Rodentia	Myomorpha	Cricetidae	Arvicolinae	Proedromys bedfordi	0.779365	0.76	True
Mammalia	Rodentia	Myomorpha	Cricetidae	Arvicolinae	Proedromys liangshanensis	0.779365	0.76	True
Mammalia	Rodentia	Myomorpha	Cricetidae	Arvicolinae	Prometheomys schaposchnikowi	0.779365	0.76	True
Mammalia	Rodentia	Myomorpha	Cricetidae	Arvicolinae	Volemys millicens	0.779365	0.76	True
Mammalia	Rodentia	Myomorpha	Cricetidae	Arvicolinae	Volemys musseri	0.779365	0.76	True
Mammalia	Rodentia	Myomorpha	Cricetidae	Sigmodontinae	Neacomys dubosti	0.767481	0.76	True
Mammalia	Rodentia	Myomorpha	Cricetidae	Sigmodontinae	Neacomys guianae	0.767481	0.76	True
Mammalia	Rodentia	Myomorpha	Cricetidae	Sigmodontinae	Neacomys minutus	0.767481	0.76	True
Mammalia	Rodentia	Myomorpha	Cricetidae	Sigmodontinae	Neacomys musseri	0.767481	0.76	True
Mammalia	Rodentia	Myomorpha	Cricetidae	Sigmodontinae	Neacomys paracou	0.767481	0.76	True
Mammalia	Rodentia	Myomorpha	Cricetidae	Sigmodontinae	Neacomys spinosus	0.767481	0.76	True
Mammalia	Chiroptera	Yangochiroptera	Molossidae	Molossinae	Chaerephon ansorgei	0.762516	0.76	True
Mammalia	Chiroptera	Yangochiroptera	Molossidae	Molossinae	Chaerephon chapini	0.762516	0.76	True
Mammalia	Chiroptera	Yangochiroptera	Molossidae	Molossinae	Chaerephon jobensis	0.762516	0.76	True
Mammalia	Chiroptera	Yangochiroptera	Molossidae	Molossinae	Chaerephon jobimena	0.762516	0.76	True
Mammalia	Chiroptera	Yangochiroptera	Molossidae	Molossinae	Chaerephon leucogaster	0.762516	0.76	True
Mammalia	Chiroptera	Yangochiroptera	Molossidae	Molossinae	Chaerephon nigeriae	0.762516	0.76	True
Mammalia	Chiroptera	Yangochiroptera	Molossidae	Molossinae	Chaerephon pumilus	0.762516	0.76	True
Mammalia	Chiroptera	Yangochiroptera	Molossidae	Molossinae	Chaerephon pusillus	0.762516	0.76	True
Mammalia	Chiroptera	Yangochiroptera	Molossidae	Molossinae	Cheiromeles parvidens	0.762516	0.76	True
Mammalia	Chiroptera	Yangochiroptera	Molossidae	Molossinae	Cheiromeles torquatus	0.762516	0.76	True
Mammalia	Chiroptera	Yangochiroptera	Molossidae	Molossinae	Cynomops abrasus	0.762516	0.76	True
Mammalia	Chiroptera	Yangochiroptera	Molossidae	Molossinae	Cynomops paranus	0.762516	0.76	True
Mammalia	Chiroptera	Yangochiroptera	Molossidae	Molossinae	Cynomops planirostris	0.762516	0.76	True
Mammalia	Chiroptera	Yangochiroptera	Molossidae	Molossinae	Eumops auripendulus	0.762516	0.76	True
Mammalia	Chiroptera	Yangochiroptera	Molossidae	Molossinae	Eumops bonariensis	0.762516	0.76	True
Mammalia	Chiroptera	Yangochiroptera	Molossidae	Molossinae	Eumops dabbenei	0.762516	0.76	True
Mammalia	Chiroptera	Yangochiroptera	Molossidae	Molossinae	Eumops ferox	0.762516	0.76	True
Mammalia	Chiroptera	Yangochiroptera	Molossidae	Molossinae	Eumops glaucinus	0.762516	0.76	True
Mammalia	Chiroptera	Yangochiroptera	Molossidae	Molossinae	Eumops hansae	0.762516	0.76	True
Mammalia	Chiroptera	Yangochiroptera	Molossidae	Molossinae	Eumops maurus	0.762516	0.76	True
Mammalia	Chiroptera	Yangochiroptera	Molossidae	Molossinae	Eumops patagonicus	0.762516	0.76	True
Mammalia	Chiroptera	Yangochiroptera	Molossidae	Molossinae	Eumops perotis	0.762516	0.76	True
Mammalia	Chiroptera	Yangochiroptera	Molossidae	Molossinae	Eumops underwoodi	0.762516	0.76	True
Mammalia	Chiroptera	Yangochiroptera	Molossidae	Molossinae	Eumops wilsoni	0.762516	0.76	True
Mammalia	Chiroptera	Yangochiroptera	Molossidae	Molossinae	Molossops mattogrossensis	0.762516	0.76	True
Mammalia	Chiroptera	Yangochiroptera	Molossidae	Molossinae	Molossops neglectus	0.762516	0.76	True
Mammalia	Chiroptera	Yangochiroptera	Molossidae	Molossinae	Molossops temminckii	0.762516	0.76	True
Mammalia	Chiroptera	Yangochiroptera	Molossidae	Molossinae	Molossus ater	0.762516	0.76	True
Mammalia	Chiroptera	Yangochiroptera	Molossidae	Molossinae	Molossus coibensis	0.762516	0.76	True
Mammalia	Chiroptera	Yangochiroptera	Molossidae	Molossinae	Molossus molossus	0.762516	0.76	True
Mammalia	Chiroptera	Yangochiroptera	Molossidae	Molossinae	Molossus rufus	0.762516	0.76	True
Mammalia	Chiroptera	Yangochiroptera	Molossidae	Molossinae	Mops bakarii	0.762516	0.76	True
Mammalia	Chiroptera	Yangochiroptera	Molossidae	Molossinae	Mops condylurus	0.762516	0.76	True
Mammalia	Chiroptera	Yangochiroptera	Molossidae	Molossinae	Mops leucostigma	0.762516	0.76	True
Mammalia	Chiroptera	Yangochiroptera	Molossidae	Molossinae	Mops midas	0.762516	0.76	True
Mammalia	Chiroptera	Yangochiroptera	Molossidae	Molossinae	Mops mops	0.762516	0.76	True
Mammalia	Chiroptera	Yangochiroptera	Molossidae	Molossinae	Mormopterus acetabulosus	0.762516	0.76	True
Mammalia	Chiroptera	Yangochiroptera	Molossidae	Molossinae	Mormopterus beccarii	0.762516	0.76	True
Mammalia	Chiroptera	Yangochiroptera	Molossidae	Molossinae	Mormopterus jugularis	0.762516	0.76	True
Mammalia	Chiroptera	Yangochiroptera	Molossidae	Molossinae	Mormopterus kalinowskii	0.762516	0.76	True
Mammalia	Chiroptera	Yangochiroptera	Molossidae	Molossinae	Mormopterus planiceps	0.762516	0.76	True
Mammalia	Chiroptera	Yangochiroptera	Molossidae	Molossinae	Myopterus daubentonii	0.762516	0.76	True
Mammalia	Chiroptera	Yangochiroptera	Molossidae	Molossinae	Nyctinomops aurispinosus	0.762516	0.76	True
Mammalia	Chiroptera	Yangochiroptera	Molossidae	Molossinae	Nyctinomops femorosaccus	0.762516	0.76	True
Mammalia	Chiroptera	Yangochiroptera	Molossidae	Molossinae	Nyctinomops laticaudatus	0.762516	0.76	True
Mammalia	Chiroptera	Yangochiroptera	Molossidae	Molossinae	Nyctinomops macrotis	0.762516	0.76	True
Mammalia	Chiroptera	Yangochiroptera	Molossidae	Molossinae	Otomops madagascariensis	0.762516	0.76	True
Mammalia	Chiroptera	Yangochiroptera	Molossidae	Molossinae	Otomops martiensseni	0.762516	0.76	True
Mammalia	Chiroptera	Yangochiroptera	Molossidae	Molossinae	Otomops wroughtoni	0.762516	0.76	True
Mammalia	Chiroptera	Yangochiroptera	Molossidae	Molossinae	Promops centralis	0.762516	0.76	True
Mammalia	Chiroptera	Yangochiroptera	Molossidae	Molossinae	Sauromys petrophilus	0.762516	0.76	True
Mammalia	Chiroptera	Yangochiroptera	Molossidae	Molossinae	Tadarida aegyptiaca	0.762516	0.76	True
Mammalia	Chiroptera	Yangochiroptera	Molossidae	Molossinae	Tadarida brasiliensis	0.762516	0.76	True
Mammalia	Chiroptera	Yangochiroptera	Molossidae	Molossinae	Tadarida fulminans	0.762516	0.76	True
Mammalia	Chiroptera	Yangochiroptera	Molossidae	Molossinae	Tadarida insignis	0.762516	0.76	True
Mammalia	Chiroptera	Yangochiroptera	Molossidae	Molossinae	Tadarida teniotis	0.762516	0.76	True
Mammalia	Chiroptera	Yangochiroptera	Molossidae	Tomopeatinae	Tomopeas ravus	0.762516	0.76	True
Mammalia	Rodentia	Myomorpha	Cricetidae	Sigmodontinae	Rheomys raptor	0.761074	0.76	True
Mammalia	Rodentia	Myomorpha	Cricetidae	Sigmodontinae	Rheomys thomasi	0.761074	0.76	True
Mammalia	Rodentia	Myomorpha	Cricetidae	Sigmodontinae	Sigmodon alstoni	0.761074	0.76	True
Mammalia	Rodentia	Myomorpha	Cricetidae	Sigmodontinae	Sigmodon leucotis	0.761074	0.76	True
Mammalia	Rodentia	Myomorpha	Cricetidae	Sigmodontinae	Sigmodon peruanus	0.761074	0.76	True
Mammalia	Soricomorpha		Soricidae	Crocidurinae	Crocidura aleksandrisi	0.749224	0.76	False
Mammalia	Soricomorpha		Soricidae	Crocidurinae	Crocidura attenuata	0.749224	0.76	False
Mammalia	Soricomorpha		Soricidae	Crocidurinae	Crocidura baileyi	0.749224	0.76	False
Mammalia	Eulipotyphla		Soricidae	Crocidurinae	Crocidura batakorum	0.749224	0.76	False
Mammalia	Soricomorpha		Soricidae	Crocidurinae	Crocidura batesi	0.749224	0.76	False
Mammalia	Soricomorpha		Soricidae	Crocidurinae	Crocidura beatus	0.749224	0.76	False
Mammalia	Soricomorpha		Soricidae	Crocidurinae	Crocidura beccarii	0.749224	0.76	False
Mammalia	Soricomorpha		Soricidae	Crocidurinae	Crocidura bottegi	0.749224	0.76	False
Mammalia	Soricomorpha		Soricidae	Crocidurinae	Crocidura brunnea	0.749224	0.76	False
Mammalia	Soricomorpha		Soricidae	Crocidurinae	Crocidura buettikoferi	0.749224	0.76	False
Mammalia	Soricomorpha		Soricidae	Crocidurinae	Crocidura canariensis	0.749224	0.76	False
Mammalia	Soricomorpha		Soricidae	Crocidurinae	Crocidura caspica	0.749224	0.76	False
Mammalia	Soricomorpha		Soricidae	Crocidurinae	Crocidura crenata	0.749224	0.76	False
Mammalia	Soricomorpha		Soricidae	Crocidurinae	Crocidura crossei	0.749224	0.76	False
Mammalia	Soricomorpha		Soricidae	Crocidurinae	Crocidura cyanea	0.749224	0.76	False
Mammalia	Soricomorpha		Soricidae	Crocidurinae	Crocidura denti	0.749224	0.76	False
Mammalia	Soricomorpha		Soricidae	Crocidurinae	Crocidura dolichura	0.749224	0.76	False
Mammalia	Soricomorpha		Soricidae	Crocidurinae	Crocidura douceti	0.749224	0.76	False
Mammalia	Soricomorpha		Soricidae	Crocidurinae	Crocidura dsinezumi	0.749224	0.76	False
Mammalia	Soricomorpha		Soricidae	Crocidurinae	Crocidura elongata	0.749224	0.76	False
Mammalia	Eulipotyphla		Soricidae	Crocidurinae	Crocidura fingui	0.749224	0.76	False
Mammalia	Soricomorpha		Soricidae	Crocidurinae	Crocidura flavescens	0.749224	0.76	False
Mammalia	Soricomorpha		Soricidae	Crocidurinae	Crocidura foetida	0.749224	0.76	False
Mammalia	Soricomorpha		Soricidae	Crocidurinae	Crocidura foxi	0.749224	0.76	False
Mammalia	Soricomorpha		Soricidae	Crocidurinae	Crocidura fuliginosa	0.749224	0.76	False
Mammalia	Soricomorpha		Soricidae	Crocidurinae	Crocidura fulvastra	0.749224	0.76	False
Mammalia	Soricomorpha		Soricidae	Crocidurinae	Crocidura fuscomurina	0.749224	0.76	False
Mammalia	Soricomorpha		Soricidae	Crocidurinae	Crocidura glassi	0.749224	0.76	False
Mammalia	Soricomorpha		Soricidae	Crocidurinae	Crocidura goliath	0.749224	0.76	False
Mammalia	Soricomorpha		Soricidae	Crocidurinae	Crocidura grandiceps	0.749224	0.76	False
Mammalia	Soricomorpha		Soricidae	Crocidurinae	Crocidura grassei	0.749224	0.76	False
Mammalia	Soricomorpha		Soricidae	Crocidurinae	Crocidura grayi	0.749224	0.76	False
Mammalia	Soricomorpha		Soricidae	Crocidurinae	Crocidura hildegardeae	0.749224	0.76	False
Mammalia	Soricomorpha		Soricidae	Crocidurinae	Crocidura hirta	0.749224	0.76	False
Mammalia	Soricomorpha		Soricidae	Crocidurinae	Crocidura horsfieldii	0.749224	0.76	False
Mammalia	Soricomorpha		Soricidae	Crocidurinae	Crocidura ichnusae	0.749224	0.76	False
Mammalia	Soricomorpha		Soricidae	Crocidurinae	Crocidura indochinensis	0.749224	0.76	False
Mammalia	Soricomorpha		Soricidae	Crocidurinae	Crocidura jouvenetae	0.749224	0.76	False
Mammalia	Soricomorpha		Soricidae	Crocidurinae	Crocidura lamottei	0.749224	0.76	False
Mammalia	Soricomorpha		Soricidae	Crocidurinae	Crocidura lasiura	0.749224	0.76	False
Mammalia	Soricomorpha		Soricidae	Crocidurinae	Crocidura lea	0.749224	0.76	False
Mammalia	Soricomorpha		Soricidae	Crocidurinae	Crocidura lepidura	0.749224	0.76	False
Mammalia	Soricomorpha		Soricidae	Crocidurinae	Crocidura leucodon	0.749224	0.76	False
Mammalia	Soricomorpha		Soricidae	Crocidurinae	Crocidura levicula	0.749224	0.76	False
Mammalia	Soricomorpha		Soricidae	Crocidurinae	Crocidura littoralis	0.749224	0.76	False
Mammalia	Soricomorpha		Soricidae	Crocidurinae	Crocidura ludia	0.749224	0.76	False
Mammalia	Soricomorpha		Soricidae	Crocidurinae	Crocidura luna	0.749224	0.76	False
Mammalia	Soricomorpha		Soricidae	Crocidurinae	Crocidura lusitania	0.749224	0.76	False
Mammalia	Soricomorpha		Soricidae	Crocidurinae	Crocidura macmillani	0.749224	0.76	False
Mammalia	Soricomorpha		Soricidae	Crocidurinae	Crocidura malayana	0.749224	0.76	False
Mammalia	Soricomorpha		Soricidae	Crocidurinae	Crocidura mariquensis	0.749224	0.76	False
Mammalia	Soricomorpha		Soricidae	Crocidurinae	Crocidura maurisca	0.749224	0.76	False
Mammalia	Soricomorpha		Soricidae	Crocidurinae	Crocidura maxi	0.749224	0.76	False
Mammalia	Soricomorpha		Soricidae	Crocidurinae	Crocidura mindorus	0.749224	0.76	False
Mammalia	Soricomorpha		Soricidae	Crocidurinae	Crocidura miya	0.749224	0.76	False
Mammalia	Soricomorpha		Soricidae	Crocidurinae	Crocidura monax	0.749224	0.76	False
Mammalia	Soricomorpha		Soricidae	Crocidurinae	Crocidura muricauda	0.749224	0.76	False
Mammalia	Soricomorpha		Soricidae	Crocidurinae	Crocidura musseri	0.749224	0.76	False
Mammalia	Soricomorpha		Soricidae	Crocidurinae	Crocidura nanilla	0.749224	0.76	False
Mammalia	Soricomorpha		Soricidae	Crocidurinae	Crocidura negligens	0.749224	0.76	False
Mammalia	Soricomorpha		Soricidae	Crocidurinae	Crocidura negrina	0.749224	0.76	False
Mammalia	Soricomorpha		Soricidae	Crocidurinae	Crocidura nigeriae	0.749224	0.76	False
Mammalia	Soricomorpha		Soricidae	Crocidurinae	Crocidura nigripes	0.749224	0.76	False
Mammalia	Soricomorpha		Soricidae	Crocidurinae	Crocidura nimbae	0.749224	0.76	False
Mammalia	Soricomorpha		Soricidae	Crocidurinae	Crocidura obscurior	0.749224	0.76	False
Mammalia	Soricomorpha		Soricidae	Crocidurinae	Crocidura olivieri	0.749224	0.76	False
Mammalia	Soricomorpha		Soricidae	Crocidurinae	Crocidura orientalis	0.749224	0.76	False
Mammalia	Soricomorpha		Soricidae	Crocidurinae	Crocidura orii	0.749224	0.76	False
Mammalia	Soricomorpha		Soricidae	Crocidurinae	Crocidura palawanensis	0.749224	0.76	False
Mammalia	Eulipotyphla		Soricidae	Crocidurinae	Crocidura panayensis	0.749224	0.76	False
Mammalia	Soricomorpha		Soricidae	Crocidurinae	Crocidura paradoxura	0.749224	0.76	False
Mammalia	Soricomorpha		Soricidae	Crocidurinae	Crocidura parvipes	0.749224	0.76	False
Mammalia	Soricomorpha		Soricidae	Crocidurinae	Crocidura poensis	0.749224	0.76	False
Mammalia	Soricomorpha		Soricidae	Crocidurinae	Crocidura rapax	0.749224	0.76	False
Mammalia	Soricomorpha		Soricidae	Crocidurinae	Crocidura rhoditis	0.749224	0.76	False
Mammalia	Soricomorpha		Soricidae	Crocidurinae	Crocidura roosevelti	0.749224	0.76	False
Mammalia	Soricomorpha		Soricidae	Crocidurinae	Crocidura russula	0.749224	0.76	False
Mammalia	Soricomorpha		Soricidae	Crocidurinae	Crocidura shantungensis	0.749224	0.76	False
Mammalia	Soricomorpha		Soricidae	Crocidurinae	Crocidura sibirica	0.749224	0.76	False
Mammalia	Soricomorpha		Soricidae	Crocidurinae	Crocidura sicula	0.749224	0.76	False
Mammalia	Soricomorpha		Soricidae	Crocidurinae	Crocidura silacea	0.749224	0.76	False
Mammalia	Soricomorpha		Soricidae	Crocidurinae	Crocidura suaveolens	0.749224	0.76	False
Mammalia	Soricomorpha		Soricidae	Crocidurinae	Crocidura tanakae	0.749224	0.76	False
Mammalia	Soricomorpha		Soricidae	Crocidurinae	Crocidura tarfayensis	0.749224	0.76	False
Mammalia	Soricomorpha		Soricidae	Crocidurinae	Crocidura thalia	0.749224	0.76	False
Mammalia	Soricomorpha		Soricidae	Crocidurinae	Crocidura theresae	0.749224	0.76	False
Mammalia	Soricomorpha		Soricidae	Crocidurinae	Crocidura turba	0.749224	0.76	False
Mammalia	Soricomorpha		Soricidae	Crocidurinae	Crocidura viaria	0.749224	0.76	False
Mammalia	Soricomorpha		Soricidae	Crocidurinae	Crocidura watasei	0.749224	0.76	False
Mammalia	Soricomorpha		Soricidae	Crocidurinae	Crocidura wuchihensis	0.749224	0.76	False
Mammalia	Soricomorpha		Soricidae	Crocidurinae	Crocidura zarudnyi	0.749224	0.76	False
Mammalia	Soricomorpha		Soricidae	Crocidurinae	Crocidura zimmermanni	0.749224	0.76	False
Mammalia	Soricomorpha		Soricidae	Crocidurinae	Diplomesodon pulchellum	0.749224	0.76	False
Mammalia	Soricomorpha		Soricidae	Myosoricinae	Myosorex blarina	0.749224	0.76	False
Mammalia	Soricomorpha		Soricidae	Myosoricinae	Myosorex cafer	0.749224	0.76	False
Mammalia	Soricomorpha		Soricidae	Myosoricinae	Myosorex geata	0.749224	0.76	False
Mammalia	Soricomorpha		Soricidae	Myosoricinae	Myosorex longicaudatus	0.749224	0.76	False
Mammalia	Soricomorpha		Soricidae	Myosoricinae	Myosorex sclateri	0.749224	0.76	False
Mammalia	Soricomorpha		Soricidae	Myosoricinae	Myosorex varius	0.749224	0.76	False
Mammalia	Soricomorpha		Soricidae	Crocidurinae	Paracrocidura maxima	0.749224	0.76	False
Mammalia	Soricomorpha		Soricidae	Crocidurinae	Paracrocidura schoutedeni	0.749224	0.76	False
Mammalia	Soricomorpha		Soricidae	Crocidurinae	Ruwenzorisorex suncoides	0.749224	0.76	False
Mammalia	Soricomorpha		Soricidae	Crocidurinae	Scutisorex somereni	0.749224	0.76	False
Mammalia	Soricomorpha		Soricidae	Crocidurinae	Suncus dayi	0.749224	0.76	False
Mammalia	Soricomorpha		Soricidae	Crocidurinae	Suncus etruscus	0.749224	0.76	False
Mammalia	Soricomorpha		Soricidae	Crocidurinae	Suncus infinitesimus	0.749224	0.76	False
Mammalia	Soricomorpha		Soricidae	Crocidurinae	Suncus lixus	0.749224	0.76	False
Mammalia	Soricomorpha		Soricidae	Crocidurinae	Suncus madagascariensis	0.749224	0.76	False
Mammalia	Soricomorpha		Soricidae	Crocidurinae	Suncus megalura	0.749224	0.76	False
Mammalia	Soricomorpha		Soricidae	Crocidurinae	Suncus montanus	0.749224	0.76	False
Mammalia	Soricomorpha		Soricidae	Crocidurinae	Suncus murinus	0.749224	0.76	False
Mammalia	Soricomorpha		Soricidae	Crocidurinae	Suncus remyi	0.749224	0.76	False
Mammalia	Soricomorpha		Soricidae	Crocidurinae	Suncus stoliczkanus	0.749224	0.76	False
Mammalia	Soricomorpha		Soricidae	Crocidurinae	Suncus varilla	0.749224	0.76	False
Mammalia	Soricomorpha		Soricidae	Crocidurinae	Sylvisorex granti	0.749224	0.76	False
Mammalia	Soricomorpha		Soricidae	Crocidurinae	Sylvisorex howelli	0.749224	0.76	False
Mammalia	Soricomorpha		Soricidae	Crocidurinae	Sylvisorex johnstoni	0.749224	0.76	False
Mammalia	Soricomorpha		Soricidae	Crocidurinae	Sylvisorex lunaris	0.749224	0.76	False
Mammalia	Soricomorpha		Soricidae	Crocidurinae	Sylvisorex ollula	0.749224	0.76	False
Mammalia	Soricomorpha		Soricidae	Crocidurinae	Sylvisorex vulcanorum	0.749224	0.76	False
Mammalia	Dasyuromorphia		Myrmecobiidae		Myrmecobius fasciatus	0.74591	0.76	False
Mammalia	Dasyuromorphia		Thylacinidae		Thylacinus cynocephalus	0.74591	0.76	False
Mammalia	Rodentia	Myomorpha	Cricetidae	Sigmodontinae	Abrothrix andinus	0.739741	0.76	False
Mammalia	Rodentia	Myomorpha	Cricetidae	Sigmodontinae	Abrothrix hershkovitzi	0.739741	0.76	False
Mammalia	Rodentia	Myomorpha	Cricetidae	Sigmodontinae	Abrothrix illuteus	0.739741	0.76	False
Mammalia	Rodentia	Myomorpha	Cricetidae	Sigmodontinae	Abrothrix jelskii	0.739741	0.76	False
Mammalia	Rodentia	Myomorpha	Cricetidae	Sigmodontinae	Abrothrix lanosus	0.739741	0.76	False
Mammalia	Rodentia	Myomorpha	Cricetidae	Sigmodontinae	Abrothrix longipilis	0.739741	0.76	False
Mammalia	Rodentia	Myomorpha	Cricetidae	Sigmodontinae	Abrothrix markhami	0.739741	0.76	False
Mammalia	Rodentia	Myomorpha	Cricetidae	Sigmodontinae	Abrothrix olivaceus	0.739741	0.76	False
Mammalia	Rodentia	Myomorpha	Cricetidae	Sigmodontinae	Aepeomys lugens	0.739741	0.76	False
Mammalia	Rodentia	Myomorpha	Cricetidae	Sigmodontinae	Akodon aerosus	0.739741	0.76	False
Mammalia	Rodentia	Myomorpha	Cricetidae	Sigmodontinae	Akodon affinis	0.739741	0.76	False
Mammalia	Rodentia	Myomorpha	Cricetidae	Sigmodontinae	Akodon albiventer	0.739741	0.76	False
Mammalia	Rodentia	Myomorpha	Cricetidae	Sigmodontinae	Akodon azarae	0.739741	0.76	False
Mammalia	Rodentia	Myomorpha	Cricetidae	Sigmodontinae	Akodon baliolus	0.739741	0.76	False
Mammalia	Rodentia	Myomorpha	Cricetidae	Sigmodontinae	Akodon boliviensis	0.739741	0.76	False
Mammalia	Rodentia	Myomorpha	Cricetidae	Sigmodontinae	Akodon budini	0.739741	0.76	False
Mammalia	Rodentia	Myomorpha	Cricetidae	Sigmodontinae	Akodon cursor	0.739741	0.76	False
Mammalia	Rodentia	Myomorpha	Cricetidae	Sigmodontinae	Akodon dayi	0.739741	0.76	False
Mammalia	Rodentia	Myomorpha	Cricetidae	Sigmodontinae	Akodon dolores	0.739741	0.76	False
Mammalia	Rodentia	Myomorpha	Cricetidae	Sigmodontinae	Akodon fumeus	0.739741	0.76	False
Mammalia	Rodentia	Myomorpha	Cricetidae	Sigmodontinae	Akodon iniscatus	0.739741	0.76	False
Mammalia	Rodentia	Myomorpha	Cricetidae	Sigmodontinae	Akodon juninensis	0.739741	0.76	False
Mammalia	Rodentia	Myomorpha	Cricetidae	Sigmodontinae	Akodon kofordi	0.739741	0.76	False
Mammalia	Rodentia	Myomorpha	Cricetidae	Sigmodontinae	Akodon latebricola	0.739741	0.76	False
Mammalia	Rodentia	Myomorpha	Cricetidae	Sigmodontinae	Akodon lindberghi	0.739741	0.76	False
Mammalia	Rodentia	Myomorpha	Cricetidae	Sigmodontinae	Akodon lutescens	0.739741	0.76	False
Mammalia	Rodentia	Myomorpha	Cricetidae	Sigmodontinae	Akodon mimus	0.739741	0.76	False
Mammalia	Rodentia	Myomorpha	Cricetidae	Sigmodontinae	Akodon molinae	0.739741	0.76	False
Mammalia	Rodentia	Myomorpha	Cricetidae	Sigmodontinae	Akodon mollis	0.739741	0.76	False
Mammalia	Rodentia	Myomorpha	Cricetidae	Sigmodontinae	Akodon montensis	0.739741	0.76	False
Mammalia	Rodentia	Myomorpha	Cricetidae	Sigmodontinae	Akodon mystax	0.739741	0.76	False
Mammalia	Rodentia	Myomorpha	Cricetidae	Sigmodontinae	Akodon orophilus	0.739741	0.76	False
Mammalia	Rodentia	Myomorpha	Cricetidae	Sigmodontinae	Akodon paranaensis	0.739741	0.76	False
Mammalia	Rodentia	Myomorpha	Cricetidae	Sigmodontinae	Akodon reigi	0.739741	0.76	False
Mammalia	Rodentia	Myomorpha	Cricetidae	Sigmodontinae	Akodon serrensis	0.739741	0.76	False
Mammalia	Rodentia	Myomorpha	Cricetidae	Sigmodontinae	Akodon siberiae	0.739741	0.76	False
Mammalia	Rodentia	Myomorpha	Cricetidae	Sigmodontinae	Akodon simulator	0.739741	0.76	False
Mammalia	Rodentia	Myomorpha	Cricetidae	Sigmodontinae	Akodon spegazzinii	0.739741	0.76	False
Mammalia	Rodentia	Myomorpha	Cricetidae	Sigmodontinae	Akodon subfuscus	0.739741	0.76	False
Mammalia	Rodentia	Myomorpha	Cricetidae	Sigmodontinae	Akodon sylvanus	0.739741	0.76	False
Mammalia	Rodentia	Myomorpha	Cricetidae	Sigmodontinae	Akodon toba	0.739741	0.76	False
Mammalia	Rodentia	Myomorpha	Cricetidae	Sigmodontinae	Akodon torques	0.739741	0.76	False
Mammalia	Rodentia	Myomorpha	Cricetidae	Sigmodontinae	Akodon varius	0.739741	0.76	False
Mammalia	Rodentia	Myomorpha	Cricetidae	Sigmodontinae	Andalgalomys olrogi	0.739741	0.76	False
Mammalia	Rodentia	Myomorpha	Cricetidae	Sigmodontinae	Andalgalomys pearsoni	0.739741	0.76	False
Mammalia	Rodentia	Myomorpha	Cricetidae	Sigmodontinae	Andalgalomys roigi	0.739741	0.76	False
Mammalia	Rodentia	Myomorpha	Cricetidae	Sigmodontinae	Andinomys edax	0.739741	0.76	False
Mammalia	Rodentia	Myomorpha	Cricetidae	Sigmodontinae	Auliscomys boliviensis	0.739741	0.76	False
Mammalia	Rodentia	Myomorpha	Cricetidae	Sigmodontinae	Auliscomys micropus	0.739741	0.76	False
Mammalia	Rodentia	Myomorpha	Cricetidae	Sigmodontinae	Auliscomys pictus	0.739741	0.76	False
Mammalia	Rodentia	Myomorpha	Cricetidae	Sigmodontinae	Auliscomys sublimis	0.739741	0.76	False
Mammalia	Rodentia	Myomorpha	Muridae	Murinae	Batomys granti	0.739741	0.76	False
Mammalia	Rodentia	Myomorpha	Muridae	Murinae	Batomys salomonseni	0.739741	0.76	False
Mammalia	Rodentia	Myomorpha	Cricetidae	Sigmodontinae	Bibimys chacoensis	0.739741	0.76	False
Mammalia	Rodentia	Myomorpha	Cricetidae	Sigmodontinae	Bibimys labiosus	0.739741	0.76	False
Mammalia	Rodentia	Myomorpha	Cricetidae	Sigmodontinae	Blarinomys breviceps	0.739741	0.76	False
Mammalia	Rodentia	Myomorpha	Cricetidae	Sigmodontinae	Bolomys amoenus	0.739741	0.76	False
Mammalia	Rodentia	Myomorpha	Cricetidae	Sigmodontinae	Bolomys lasiurus	0.739741	0.76	False
Mammalia	Rodentia	Myomorpha	Cricetidae	Sigmodontinae	Bolomys temchuki	0.739741	0.76	False
Mammalia	Rodentia	Myomorpha	Cricetidae	Sigmodontinae	Bolomys urichi	0.739741	0.76	False
Mammalia	Rodentia	Myomorpha	Cricetidae	Sigmodontinae	Brucepattersonius igniventris	0.739741	0.76	False
Mammalia	Rodentia	Myomorpha	Cricetidae	Sigmodontinae	Brucepattersonius soricinus	0.739741	0.76	False
Mammalia	Rodentia	Myomorpha	Cricetidae	Sigmodontinae	Calomys callidus	0.739741	0.76	False
Mammalia	Rodentia	Myomorpha	Cricetidae	Sigmodontinae	Calomys callosus	0.739741	0.76	False
Mammalia	Rodentia	Myomorpha	Cricetidae	Sigmodontinae	Calomys expulsus	0.739741	0.76	False
Mammalia	Rodentia	Myomorpha	Cricetidae	Sigmodontinae	Calomys fecundus	0.739741	0.76	False
Mammalia	Rodentia	Myomorpha	Cricetidae	Sigmodontinae	Calomys hummelincki	0.739741	0.76	False
Mammalia	Rodentia	Myomorpha	Cricetidae	Sigmodontinae	Calomys laucha	0.739741	0.76	False
Mammalia	Rodentia	Myomorpha	Cricetidae	Sigmodontinae	Calomys lepidus	0.739741	0.76	False
Mammalia	Rodentia	Myomorpha	Cricetidae	Sigmodontinae	Calomys musculinus	0.739741	0.76	False
Mammalia	Rodentia	Myomorpha	Cricetidae	Sigmodontinae	Calomys sorellus	0.739741	0.76	False
Mammalia	Rodentia	Myomorpha	Cricetidae	Sigmodontinae	Calomys tener	0.739741	0.76	False
Mammalia	Rodentia	Myomorpha	Cricetidae	Sigmodontinae	Calomys tocantinsi	0.739741	0.76	False
Mammalia	Rodentia	Myomorpha	Cricetidae	Sigmodontinae	Calomys venustus	0.739741	0.76	False
Mammalia	Rodentia	Myomorpha	Muridae	Murinae	Carpomys phaeurus	0.739741	0.76	False
Mammalia	Rodentia	Myomorpha	Cricetidae	Sigmodontinae	Chelemys macronyx	0.739741	0.76	False
Mammalia	Rodentia	Myomorpha	Cricetidae	Sigmodontinae	Chelemys megalonyx	0.739741	0.76	False
Mammalia	Rodentia	Myomorpha	Cricetidae	Sigmodontinae	Chilomys instans	0.739741	0.76	False
Mammalia	Rodentia	Myomorpha	Cricetidae	Sigmodontinae	Chinchillula sahamae	0.739741	0.76	False
Mammalia	Rodentia	Myomorpha	Muridae	Murinae	Coccymys ruemmleri	0.739741	0.76	False
Mammalia	Rodentia	Myomorpha	Muridae	Murinae	Crateromys heaneyi	0.739741	0.76	False
Mammalia	Rodentia	Myomorpha	Muridae	Murinae	Crossomys moncktoni	0.739741	0.76	False
Mammalia	Rodentia	Myomorpha	Cricetidae	Sigmodontinae	Delomys collinus	0.739741	0.76	False
Mammalia	Rodentia	Myomorpha	Cricetidae	Sigmodontinae	Delomys dorsalis	0.739741	0.76	False
Mammalia	Rodentia	Myomorpha	Cricetidae	Sigmodontinae	Delomys sublineatus	0.739741	0.76	False
Mammalia	Rodentia	Myomorpha	Cricetidae	Sigmodontinae	Deltamys kempi	0.739741	0.76	False
Mammalia	Rodentia	Myomorpha	Muridae	Murinae	Dephomys defua	0.739741	0.76	False
Mammalia	Rodentia	Myomorpha	Cricetidae	Sigmodontinae	Eligmodontia moreni	0.739741	0.76	False
Mammalia	Rodentia	Myomorpha	Cricetidae	Sigmodontinae	Eligmodontia morgani	0.739741	0.76	False
Mammalia	Rodentia	Myomorpha	Cricetidae	Sigmodontinae	Eligmodontia puerulus	0.739741	0.76	False
Mammalia	Rodentia	Myomorpha	Cricetidae	Sigmodontinae	Eligmodontia typus	0.739741	0.76	False
Mammalia	Rodentia	Myomorpha	Cricetidae	Sigmodontinae	Euneomys chinchilloides	0.739741	0.76	False
Mammalia	Rodentia	Myomorpha	Cricetidae	Sigmodontinae	Euneomys mordax	0.739741	0.76	False
Mammalia	Rodentia	Myomorpha	Cricetidae	Sigmodontinae	Galenomys garleppi	0.739741	0.76	False
Mammalia	Rodentia	Myomorpha	Cricetidae	Sigmodontinae	Geoxus valdivianus	0.739741	0.76	False
Mammalia	Rodentia	Myomorpha	Cricetidae	Sigmodontinae	Graomys centralis	0.739741	0.76	False
Mammalia	Rodentia	Myomorpha	Cricetidae	Sigmodontinae	Graomys domorum	0.739741	0.76	False
Mammalia	Rodentia	Myomorpha	Cricetidae	Sigmodontinae	Graomys griseoflavus	0.739741	0.76	False
Mammalia	Rodentia	Myomorpha	Cricetidae	Sigmodontinae	Irenomys tarsalis	0.739741	0.76	False
Mammalia	Rodentia	Myomorpha	Cricetidae	Sigmodontinae	Juliomys pictipes	0.739741	0.76	False
Mammalia	Rodentia	Myomorpha	Cricetidae	Sigmodontinae	Juliomys rimofrons	0.739741	0.76	False
Mammalia	Rodentia	Myomorpha	Cricetidae	Sigmodontinae	Juscelinomys huanchacae	0.739741	0.76	False
Mammalia	Rodentia	Myomorpha	Cricetidae	Sigmodontinae	Kunsia tomentosus	0.739741	0.76	False
Mammalia	Rodentia	Myomorpha	Muridae	Murinae	Lamottemys okuensis	0.739741	0.76	False
Mammalia	Rodentia	Myomorpha	Cricetidae	Sigmodontinae	Lenoxus apicalis	0.739741	0.76	False
Mammalia	Rodentia	Myomorpha	Muridae	Murinae	Malpaisomys insularis	0.739741	0.76	False
Mammalia	Rodentia	Myomorpha	Cricetidae	Sigmodontinae	Necromys lactens	0.739741	0.76	False
Mammalia	Rodentia	Myomorpha	Cricetidae	Sigmodontinae	Necromys lenguarum	0.739741	0.76	False
Mammalia	Rodentia	Myomorpha	Cricetidae	Sigmodontinae	Necromys obscurus	0.739741	0.76	False
Mammalia	Rodentia	Myomorpha	Cricetidae	Sigmodontinae	Neotomys ebriosus	0.739741	0.76	False
Mammalia	Rodentia	Myomorpha	Cricetidae	Sigmodontinae	Nephelomys albigularis	0.739741	0.76	False
Mammalia	Rodentia	Myomorpha	Cricetidae	Sigmodontinae	Nephelomys keaysi	0.739741	0.76	False
Mammalia	Rodentia	Myomorpha	Cricetidae	Sigmodontinae	Nephelomys levipes	0.739741	0.76	False
Mammalia	Rodentia	Myomorpha	Cricetidae	Sigmodontinae	Neusticomys monticolus	0.739741	0.76	False
Mammalia	Rodentia	Myomorpha	Cricetidae	Sigmodontinae	Notiomys edwardsii	0.739741	0.76	False
Mammalia	Rodentia	Myomorpha	Cricetidae	Sigmodontinae	Oxymycterus amazonicus	0.739741	0.76	False
Mammalia	Rodentia	Myomorpha	Cricetidae	Sigmodontinae	Oxymycterus dasytrichus	0.739741	0.76	False
Mammalia	Rodentia	Myomorpha	Cricetidae	Sigmodontinae	Oxymycterus delator	0.739741	0.76	False
Mammalia	Rodentia	Myomorpha	Cricetidae	Sigmodontinae	Oxymycterus hiska	0.739741	0.76	False
Mammalia	Rodentia	Myomorpha	Cricetidae	Sigmodontinae	Oxymycterus josei	0.739741	0.76	False
Mammalia	Rodentia	Myomorpha	Cricetidae	Sigmodontinae	Oxymycterus nasutus	0.739741	0.76	False
Mammalia	Rodentia	Myomorpha	Cricetidae	Sigmodontinae	Oxymycterus paramensis	0.739741	0.76	False
Mammalia	Rodentia	Myomorpha	Cricetidae	Sigmodontinae	Oxymycterus quaestor	0.739741	0.76	False
Mammalia	Rodentia	Myomorpha	Cricetidae	Sigmodontinae	Oxymycterus rufus	0.739741	0.76	False
Mammalia	Rodentia	Myomorpha	Cricetidae	Sigmodontinae	Pearsonomys annectens	0.739741	0.76	False
Mammalia	Rodentia	Myomorpha	Muridae	Murinae	Phloeomys cumingi	0.739741	0.76	False
Mammalia	Rodentia	Myomorpha	Cricetidae	Sigmodontinae	Phyllotis amicus	0.739741	0.76	False
Mammalia	Rodentia	Myomorpha	Cricetidae	Sigmodontinae	Phyllotis andium	0.739741	0.76	False
Mammalia	Rodentia	Myomorpha	Cricetidae	Sigmodontinae	Phyllotis bonariensis	0.739741	0.76	False
Mammalia	Rodentia	Myomorpha	Cricetidae	Sigmodontinae	Phyllotis darwini	0.739741	0.76	False
Mammalia	Rodentia	Myomorpha	Cricetidae	Sigmodontinae	Phyllotis limatus	0.739741	0.76	False
Mammalia	Rodentia	Myomorpha	Cricetidae	Sigmodontinae	Phyllotis magister	0.739741	0.76	False
Mammalia	Rodentia	Myomorpha	Cricetidae	Sigmodontinae	Phyllotis osgoodi	0.739741	0.76	False
Mammalia	Rodentia	Myomorpha	Cricetidae	Sigmodontinae	Phyllotis osilae	0.739741	0.76	False
Mammalia	Rodentia	Myomorpha	Cricetidae	Sigmodontinae	Phyllotis wolffsohni	0.739741	0.76	False
Mammalia	Rodentia	Myomorpha	Cricetidae	Sigmodontinae	Phyllotis xanthopygus	0.739741	0.76	False
Mammalia	Rodentia	Myomorpha	Muridae	Murinae	Pogonomelomys mayeri	0.739741	0.76	False
Mammalia	Rodentia	Myomorpha	Cricetidae	Sigmodontinae	Punomys kofordi	0.739741	0.76	False
Mammalia	Rodentia	Myomorpha	Cricetidae	Sigmodontinae	Reithrodon auritus	0.739741	0.76	False
Mammalia	Rodentia	Myomorpha	Cricetidae	Sigmodontinae	Rhagomys longilingua	0.739741	0.76	False
Mammalia	Rodentia	Myomorpha	Cricetidae	Sigmodontinae	Rhagomys rufescens	0.739741	0.76	False
Mammalia	Rodentia	Myomorpha	Cricetidae	Sigmodontinae	Rhipidomys emiliae	0.739741	0.76	False
Mammalia	Rodentia	Myomorpha	Cricetidae	Sigmodontinae	Rhipidomys gardneri	0.739741	0.76	False
Mammalia	Rodentia	Myomorpha	Cricetidae	Sigmodontinae	Rhipidomys leucodactylus	0.739741	0.76	False
Mammalia	Rodentia	Myomorpha	Cricetidae	Sigmodontinae	Rhipidomys macconnelli	0.739741	0.76	False
Mammalia	Rodentia	Myomorpha	Cricetidae	Sigmodontinae	Rhipidomys macrurus	0.739741	0.76	False
Mammalia	Rodentia	Myomorpha	Cricetidae	Sigmodontinae	Rhipidomys mastacalis	0.739741	0.76	False
Mammalia	Rodentia	Myomorpha	Cricetidae	Sigmodontinae	Rhipidomys nitela	0.739741	0.76	False
Mammalia	Rodentia	Myomorpha	Cricetidae	Sigmodontinae	Rhipidomys wetzeli	0.739741	0.76	False
Mammalia	Rodentia	Myomorpha	Cricetidae	Sigmodontinae	Salinomys delicatus	0.739741	0.76	False
Mammalia	Rodentia	Myomorpha	Cricetidae	Sigmodontinae	Scapteromys aquaticus	0.739741	0.76	False
Mammalia	Rodentia	Myomorpha	Cricetidae	Sigmodontinae	Scapteromys tumidus	0.739741	0.76	False
Mammalia	Rodentia	Myomorpha	Cricetidae	Sigmodontinae	Scolomys juruaense	0.739741	0.76	False
Mammalia	Rodentia	Myomorpha	Cricetidae	Sigmodontinae	Scolomys melanops	0.739741	0.76	False
Mammalia	Rodentia	Myomorpha	Cricetidae	Sigmodontinae	Scolomys ucayalensis	0.739741	0.76	False
Mammalia	Rodentia	Myomorpha	Cricetidae	Sigmodontinae	Sigmodon alleni	0.739741	0.76	False
Mammalia	Rodentia	Myomorpha	Cricetidae	Sigmodontinae	Sigmodon arizonae	0.739741	0.76	False
Mammalia	Rodentia	Myomorpha	Cricetidae	Sigmodontinae	Sigmodon hirsutus	0.739741	0.76	False
Mammalia	Rodentia	Myomorpha	Cricetidae	Sigmodontinae	Sigmodon mascotensis	0.739741	0.76	False
Mammalia	Rodentia	Myomorpha	Cricetidae	Sigmodontinae	Sigmodon ochrognathus	0.739741	0.76	False
Mammalia	Rodentia	Myomorpha	Cricetidae	Sigmodontinae	Sigmodon toltecus	0.739741	0.76	False
Mammalia	Rodentia	Myomorpha	Cricetidae	Sigmodontinae	Tapecomys primus	0.739741	0.76	False
Mammalia	Rodentia	Myomorpha	Muridae	Murinae	Thallomys loringi	0.739741	0.76	False
Mammalia	Rodentia	Myomorpha	Muridae	Murinae	Thallomys nigricauda	0.739741	0.76	False
Mammalia	Rodentia	Myomorpha	Muridae	Murinae	Thallomys paedulcus	0.739741	0.76	False
Mammalia	Rodentia	Myomorpha	Cricetidae	Sigmodontinae	Thalpomys cerradensis	0.739741	0.76	False
Mammalia	Rodentia	Myomorpha	Cricetidae	Sigmodontinae	Thalpomys lasiotis	0.739741	0.76	False
Mammalia	Rodentia	Myomorpha	Cricetidae	Sigmodontinae	Thaptomys nigrita	0.739741	0.76	False
Mammalia	Rodentia	Myomorpha	Cricetidae	Sigmodontinae	Thomasomys aureus	0.739741	0.76	False
Mammalia	Rodentia	Myomorpha	Cricetidae	Sigmodontinae	Thomasomys baeops	0.739741	0.76	False
Mammalia	Rodentia	Myomorpha	Cricetidae	Sigmodontinae	Thomasomys caudivarius	0.739741	0.76	False
Mammalia	Rodentia	Myomorpha	Cricetidae	Sigmodontinae	Thomasomys cinnameus	0.739741	0.76	False
Mammalia	Rodentia	Myomorpha	Cricetidae	Sigmodontinae	Thomasomys daphne	0.739741	0.76	False
Mammalia	Rodentia	Myomorpha	Cricetidae	Sigmodontinae	Thomasomys erro	0.739741	0.76	False
Mammalia	Rodentia	Myomorpha	Cricetidae	Sigmodontinae	Thomasomys gracilis	0.739741	0.76	False
Mammalia	Rodentia	Myomorpha	Cricetidae	Sigmodontinae	Thomasomys ladewi	0.739741	0.76	False
Mammalia	Rodentia	Myomorpha	Cricetidae	Sigmodontinae	Thomasomys notatus	0.739741	0.76	False
Mammalia	Rodentia	Myomorpha	Cricetidae	Sigmodontinae	Thomasomys oreas	0.739741	0.76	False
Mammalia	Rodentia	Myomorpha	Cricetidae	Sigmodontinae	Wiedomys pyrrhorhinos	0.739741	0.76	False
Mammalia	Rodentia	Myomorpha	Cricetidae	Arvicolinae	Alticola albicaudus	0.717893	0.76	False
Mammalia	Rodentia	Myomorpha	Cricetidae	Arvicolinae	Alticola argentatus	0.717893	0.76	False
Mammalia	Rodentia	Myomorpha	Cricetidae	Arvicolinae	Alticola barakshin	0.717893	0.76	False
Mammalia	Rodentia	Myomorpha	Cricetidae	Arvicolinae	Alticola macrotis	0.717893	0.76	False
Mammalia	Rodentia	Myomorpha	Cricetidae	Arvicolinae	Alticola semicanus	0.717893	0.76	False
Mammalia	Rodentia	Myomorpha	Cricetidae	Arvicolinae	Alticola strelzowi	0.717893	0.76	False
Mammalia	Rodentia	Myomorpha	Cricetidae	Arvicolinae	Alticola tuvinicus	0.717893	0.76	False
Mammalia	Rodentia	Myomorpha	Cricetidae	Arvicolinae	Arvicola amphibius	0.717893	0.76	False
Mammalia	Rodentia	Myomorpha	Cricetidae	Arvicolinae	Arvicola sapidus	0.717893	0.76	False
Mammalia	Rodentia	Myomorpha	Cricetidae	Arvicolinae	Arvicola scherman	0.717893	0.76	False
Mammalia	Rodentia	Myomorpha	Cricetidae	Arvicolinae	Chionomys gud	0.717893	0.76	False
[truncated: 2,009 more rows]

## Sheet: (d) Other (birds)
class	order	suborder	family	subfamily	species	probability	cutoff	prediction
Aves	Passeriformes		Icteridae		Agelaius humeralis	0.922168	0.76	True
Aves	Passeriformes		Icteridae		Agelaius phoeniceus	0.922168	0.76	True
Aves	Passeriformes		Icteridae		Agelaius tricolor	0.922168	0.76	True
Aves	Passeriformes		Icteridae		Agelaius xanthomus	0.922168	0.76	True
Aves	Passeriformes		Icteridae		Amblycercus holosericeus	0.922168	0.76	True
Aves	Passeriformes		Icteridae		Amblyramphus holosericeus	0.922168	0.76	True
Aves	Passeriformes		Motacillidae		Anthus berthelotii	0.922168	0.76	True
Aves	Passeriformes		Motacillidae		Anthus brachyurus	0.922168	0.76	True
Aves	Passeriformes		Motacillidae		Anthus campestris	0.922168	0.76	True
Aves	Passeriformes		Motacillidae		Anthus cervinus	0.922168	0.76	True
Aves	Passeriformes		Motacillidae		Anthus cinnamomeus	0.922168	0.76	True
Aves	Passeriformes		Motacillidae		Anthus correndera	0.922168	0.76	True
Aves	Passeriformes		Motacillidae		Anthus furcatus	0.922168	0.76	True
Aves	Passeriformes		Motacillidae		Anthus godlewskii	0.922168	0.76	True
Aves	Passeriformes		Motacillidae		Anthus gustavi	0.922168	0.76	True
Aves	Passeriformes		Motacillidae		Anthus hellmayri	0.922168	0.76	True
Aves	Passeriformes		Motacillidae		Anthus hodgsoni	0.922168	0.76	True
Aves	Passeriformes		Motacillidae		Anthus leucophrys	0.922168	0.76	True
Aves	Passeriformes		Motacillidae		Anthus lineiventris	0.922168	0.76	True
Aves	Passeriformes		Motacillidae		Anthus lutescens	0.922168	0.76	True
Aves	Passeriformes		Motacillidae		Anthus petrosus	0.922168	0.76	True
Aves	Passeriformes		Motacillidae		Anthus pratensis	0.922168	0.76	True
Aves	Passeriformes		Motacillidae		Anthus richardi	0.922168	0.76	True
Aves	Passeriformes		Motacillidae		Anthus rubescens	0.922168	0.76	True
Aves	Passeriformes		Motacillidae		Anthus similis	0.922168	0.76	True
Aves	Passeriformes		Motacillidae		Anthus trivialis	0.922168	0.76	True
Aves	Passeriformes		Motacillidae		Anthus vaalensis	0.922168	0.76	True
Aves	Passeriformes		Parulidae		Basileuterus basilicus	0.922168	0.76	True
Aves	Passeriformes		Parulidae		Basileuterus belli	0.922168	0.76	True
Aves	Passeriformes		Parulidae		Basileuterus bivittatus	0.922168	0.76	True
Aves	Passeriformes		Parulidae		Basileuterus chrysogaster	0.922168	0.76	True
Aves	Passeriformes		Parulidae		Basileuterus cinereicollis	0.922168	0.76	True
Aves	Passeriformes		Parulidae		Basileuterus conspicillatus	0.922168	0.76	True
Aves	Passeriformes		Parulidae		Basileuterus culicivorus	0.922168	0.76	True
Aves	Passeriformes		Parulidae		Basileuterus flaveolus	0.922168	0.76	True
Aves	Passeriformes		Parulidae		Basileuterus hypoleucus	0.922168	0.76	True
Aves	Passeriformes		Parulidae		Basileuterus lachrymosus	0.922168	0.76	True
Aves	Passeriformes		Parulidae		Basileuterus leucoblepharus	0.922168	0.76	True
Aves	Passeriformes		Parulidae		Basileuterus leucophrys	0.922168	0.76	True
Aves	Passeriformes		Parulidae		Basileuterus luteoviridis	0.922168	0.76	True
Aves	Passeriformes		Parulidae		Basileuterus melanogenys	0.922168	0.76	True
Aves	Passeriformes		Parulidae		Basileuterus rivularis	0.922168	0.76	True
Aves	Passeriformes		Parulidae		Basileuterus rufifrons	0.922168	0.76	True
Aves	Passeriformes		Parulidae		Basileuterus signatus	0.922168	0.76	True
Aves	Passeriformes		Parulidae		Basileuterus trifasciatus	0.922168	0.76	True
Aves	Passeriformes		Parulidae		Basileuterus tristriatus	0.922168	0.76	True
Aves	Passeriformes		Icteridae		Cacicus cela	0.922168	0.76	True
Aves	Passeriformes		Icteridae		Cacicus chrysonotus	0.922168	0.76	True
Aves	Passeriformes		Icteridae		Cacicus chrysopterus	0.922168	0.76	True
Aves	Passeriformes		Icteridae		Cacicus haemorrhous	0.922168	0.76	True
Aves	Passeriformes		Icteridae		Cacicus leucoramphus	0.922168	0.76	True
Aves	Passeriformes		Icteridae		Cacicus melanicterus	0.922168	0.76	True
Aves	Passeriformes		Icteridae		Cacicus sclateri	0.922168	0.76	True
Aves	Passeriformes		Icteridae		Cacicus solitarius	0.922168	0.76	True
Aves	Passeriformes		Icteridae		Cacicus uropygialis	0.922168	0.76	True
Aves	Passeriformes		Parulidae		Cardellina canadensis	0.922168	0.76	True
Aves	Passeriformes		Parulidae		Cardellina pusilla	0.922168	0.76	True
Aves	Passeriformes		Parulidae		Cardellina rubra	0.922168	0.76	True
Aves	Passeriformes		Parulidae		Cardellina rubrifrons	0.922168	0.76	True
Aves	Passeriformes		Parulidae		Cardellina versicolor	0.922168	0.76	True
Aves	Passeriformes		Parulidae		Catharopeza bishopi	0.922168	0.76	True
Aves	Passeriformes		Icteridae		Chrysomus cyanopus	0.922168	0.76	True
Aves	Passeriformes		Icteridae		Chrysomus icterocephalus	0.922168	0.76	True
Aves	Passeriformes		Icteridae		Chrysomus ruficapillus	0.922168	0.76	True
Aves	Passeriformes		Icteridae		Chrysomus thilius	0.922168	0.76	True
Aves	Passeriformes		Icteridae		Chrysomus xanthophthalmus	0.922168	0.76	True
Aves	Passeriformes		Icteridae		Curaeus curaeus	0.922168	0.76	True
Aves	Passeriformes		Icteridae		Dives dives	0.922168	0.76	True
Aves	Passeriformes		Icteridae		Dives warczewiczi	0.922168	0.76	True
Aves	Passeriformes		Icteridae		Dolichonyx oryzivorus	0.922168	0.76	True
Aves	Passeriformes		Icteridae		Euphagus carolinus	0.922168	0.76	True
Aves	Passeriformes		Icteridae		Euphagus cyanocephalus	0.922168	0.76	True
Aves	Passeriformes		Parulidae		Geothlypis aequinoctialis	0.922168	0.76	True
Aves	Passeriformes		Parulidae		Geothlypis beldingi	0.922168	0.76	True
Aves	Passeriformes		Parulidae		Geothlypis flavovelata	0.922168	0.76	True
Aves	Passeriformes		Parulidae		Geothlypis formosa	0.922168	0.76	True
Aves	Passeriformes		Parulidae		Geothlypis nelsoni	0.922168	0.76	True
Aves	Passeriformes		Parulidae		Geothlypis philadelphia	0.922168	0.76	True
Aves	Passeriformes		Parulidae		Geothlypis poliocephala	0.922168	0.76	True
Aves	Passeriformes		Parulidae		Geothlypis rostrata	0.922168	0.76	True
Aves	Passeriformes		Parulidae		Geothlypis semiflava	0.922168	0.76	True
Aves	Passeriformes		Parulidae		Geothlypis tolmiei	0.922168	0.76	True
Aves	Passeriformes		Parulidae		Geothlypis trichas	0.922168	0.76	True
Aves	Passeriformes		Icteridae		Gnorimopsar chopi	0.922168	0.76	True
Aves	Passeriformes		Cardinalidae		Granatellus pelzelni	0.922168	0.76	True
Aves	Passeriformes		Cardinalidae		Granatellus sallaei	0.922168	0.76	True
Aves	Passeriformes		Cardinalidae		Granatellus venustus	0.922168	0.76	True
Aves	Passeriformes		Icteridae		Gymnomystax mexicanus	0.922168	0.76	True
Aves	Passeriformes		Parulidae		Helmitheros vermivorum	0.922168	0.76	True
Aves	Passeriformes		Parulidae		Icteria virens	0.922168	0.76	True
Aves	Passeriformes		Icteridae		Icterus abeillei	0.922168	0.76	True
Aves	Passeriformes		Icteridae		Icterus auratus	0.922168	0.76	True
Aves	Passeriformes		Icteridae		Icterus auricapillus	0.922168	0.76	True
Aves	Passeriformes		Icteridae		Icterus bonana	0.922168	0.76	True
Aves	Passeriformes		Icteridae		Icterus bullockii	0.922168	0.76	True
Aves	Passeriformes		Icteridae		Icterus cayanensis	0.922168	0.76	True
Aves	Passeriformes		Icteridae		Icterus chrysater	0.922168	0.76	True
Aves	Passeriformes		Icteridae		Icterus cucullatus	0.922168	0.76	True
Aves	Passeriformes		Icteridae		Icterus dominicensis	0.922168	0.76	True
Aves	Passeriformes		Icteridae		Icterus galbula	0.922168	0.76	True
Aves	Passeriformes		Icteridae		Icterus graceannae	0.922168	0.76	True
Aves	Passeriformes		Icteridae		Icterus graduacauda	0.922168	0.76	True
Aves	Passeriformes		Icteridae		Icterus gularis	0.922168	0.76	True
Aves	Passeriformes		Icteridae		Icterus icterus	0.922168	0.76	True
Aves	Passeriformes		Icteridae		Icterus jamacaii	0.922168	0.76	True
Aves	Passeriformes		Icteridae		Icterus laudabilis	0.922168	0.76	True
Aves	Passeriformes		Icteridae		Icterus leucopteryx	0.922168	0.76	True
Aves	Passeriformes		Icteridae		Icterus maculialatus	0.922168	0.76	True
Aves	Passeriformes		Icteridae		Icterus mesomelas	0.922168	0.76	True
Aves	Passeriformes		Icteridae		Icterus nigrogularis	0.922168	0.76	True
Aves	Passeriformes		Icteridae		Icterus oberi	0.922168	0.76	True
Aves	Passeriformes		Icteridae		Icterus parisorum	0.922168	0.76	True
Aves	Passeriformes		Icteridae		Icterus pectoralis	0.922168	0.76	True
Aves	Passeriformes		Icteridae		Icterus prosthemelas	0.922168	0.76	True
Aves	Passeriformes		Icteridae		Icterus pustulatus	0.922168	0.76	True
Aves	Passeriformes		Icteridae		Icterus wagleri	0.922168	0.76	True
Aves	Passeriformes		Icteridae		Lampropsar tanagrinus	0.922168	0.76	True
Aves	Passeriformes		Parulidae		Leiothlypis celata	0.922168	0.76	True
Aves	Passeriformes		Parulidae		Leiothlypis peregrina	0.922168	0.76	True
Aves	Passeriformes		Parulidae		Leucopeza semperi	0.922168	0.76	True
Aves	Passeriformes		Parulidae		Limnothlypis swainsonii	0.922168	0.76	True
Aves	Passeriformes		Icteridae		Macroagelaius imthurni	0.922168	0.76	True
Aves	Passeriformes		Icteridae		Macroagelaius subalaris	0.922168	0.76	True
Aves	Passeriformes		Motacillidae		Macronyx croceus	0.922168	0.76	True
Aves	Passeriformes		Parulidae		Microligea palustris	0.922168	0.76	True
Aves	Passeriformes		Parulidae		Mniotilta varia	0.922168	0.76	True
Aves	Passeriformes		Icteridae		Molothrus aeneus	0.922168	0.76	True
Aves	Passeriformes		Icteridae		Molothrus ater	0.922168	0.76	True
Aves	Passeriformes		Icteridae		Molothrus badius	0.922168	0.76	True
Aves	Passeriformes		Icteridae		Molothrus bonariensis	0.922168	0.76	True
Aves	Passeriformes		Icteridae		Molothrus oryzivorus	0.922168	0.76	True
Aves	Passeriformes		Icteridae		Molothrus rufoaxillaris	0.922168	0.76	True
Aves	Passeriformes		Motacillidae		Motacilla aguimp	0.922168	0.76	True
Aves	Passeriformes		Motacillidae		Motacilla alba	0.922168	0.76	True
Aves	Passeriformes		Motacillidae		Motacilla capensis	0.922168	0.76	True
Aves	Passeriformes		Motacillidae		Motacilla cinerea	0.922168	0.76	True
Aves	Passeriformes		Motacillidae		Motacilla citreola	0.922168	0.76	True
Aves	Passeriformes		Motacillidae		Motacilla clara	0.922168	0.76	True
Aves	Passeriformes		Motacillidae		Motacilla flava	0.922168	0.76	True
Aves	Passeriformes		Motacillidae		Motacilla flaviventris	0.922168	0.76	True
Aves	Passeriformes		Motacillidae		Motacilla madaraspatensis	0.922168	0.76	True
Aves	Passeriformes		Parulidae		Myioborus albifacies	0.922168	0.76	True
Aves	Passeriformes		Parulidae		Myioborus albifrons	0.922168	0.76	True
Aves	Passeriformes		Parulidae		Myioborus brunniceps	0.922168	0.76	True
Aves	Passeriformes		Parulidae		Myioborus cardonai	0.922168	0.76	True
Aves	Passeriformes		Parulidae		Myioborus castaneocapillus	0.922168	0.76	True
Aves	Passeriformes		Parulidae		Myioborus flavivertex	0.922168	0.76	True
Aves	Passeriformes		Parulidae		Myioborus melanocephalus	0.922168	0.76	True
Aves	Passeriformes		Parulidae		Myioborus miniatus	0.922168	0.76	True
Aves	Passeriformes		Parulidae		Myioborus ornatus	0.922168	0.76	True
Aves	Passeriformes		Parulidae		Myioborus pariae	0.922168	0.76	True
Aves	Passeriformes		Parulidae		Myioborus pictus	0.922168	0.76	True
Aves	Passeriformes		Parulidae		Myioborus torquatus	0.922168	0.76	True
Aves	Passeriformes		Parulidae		Myiothlypis coronata	0.922168	0.76	True
Aves	Passeriformes		Parulidae		Myiothlypis fraseri	0.922168	0.76	True
Aves	Passeriformes		Parulidae		Myiothlypis nigrocristata	0.922168	0.76	True
Aves	Passeriformes		Icteridae		Nesopsar nigerrimus	0.922168	0.76	True
Aves	Passeriformes		Icteridae		Ocyalus latirostris	0.922168	0.76	True
Aves	Passeriformes		Parulidae		Oporornis agilis	0.922168	0.76	True
Aves	Passeriformes		Icteridae		Oreopsar bolivianus	0.922168	0.76	True
Aves	Passeriformes		Parulidae		Oreothlypis crissalis	0.922168	0.76	True
Aves	Passeriformes		Parulidae		Oreothlypis gutturalis	0.922168	0.76	True
Aves	Passeriformes		Parulidae		Oreothlypis luciae	0.922168	0.76	True
Aves	Passeriformes		Parulidae		Oreothlypis ruficapilla	0.922168	0.76	True
Aves	Passeriformes		Parulidae		Oreothlypis superciliosa	0.922168	0.76	True
Aves	Passeriformes		Parulidae		Oreothlypis virginiae	0.922168	0.76	True
Aves	Passeriformes		Parulidae		Parkesia motacilla	0.922168	0.76	True
Aves	Passeriformes		Parulidae		Parkesia noveboracensis	0.922168	0.76	True
Aves	Passeriformes		Parulidae		Protonotaria citrea	0.922168	0.76	True
Aves	Passeriformes		Icteridae		Psarocolius angustifrons	0.922168	0.76	True
Aves	Passeriformes		Icteridae		Psarocolius atrovirens	0.922168	0.76	True
Aves	Passeriformes		Icteridae		Psarocolius bifasciatus	0.922168	0.76	True
Aves	Passeriformes		Icteridae		Psarocolius decumanus	0.922168	0.76	True
Aves	Passeriformes		Icteridae		Psarocolius montezuma	0.922168	0.76	True
Aves	Passeriformes		Icteridae		Psarocolius oseryi	0.922168	0.76	True
Aves	Passeriformes		Icteridae		Psarocolius viridis	0.922168	0.76	True
Aves	Passeriformes		Icteridae		Psarocolius wagleri	0.922168	0.76	True
Aves	Passeriformes		Icteridae		Pseudoleistes guirahuro	0.922168	0.76	True
Aves	Passeriformes		Icteridae		Pseudoleistes virescens	0.922168	0.76	True
Aves	Passeriformes		Parulidae		Seiurus aurocapilla	0.922168	0.76	True
Aves	Passeriformes		Parulidae		Setophaga adelaidae	0.922168	0.76	True
Aves	Passeriformes		Parulidae		Setophaga americana	0.922168	0.76	True
Aves	Passeriformes		Parulidae		Setophaga angelae	0.922168	0.76	True
Aves	Passeriformes		Parulidae		Setophaga caerulescens	0.922168	0.76	True
Aves	Passeriformes		Parulidae		Setophaga castanea	0.922168	0.76	True
Aves	Passeriformes		Parulidae		Setophaga cerulea	0.922168	0.76	True
Aves	Passeriformes		Parulidae		Setophaga chrysoparia	0.922168	0.76	True
Aves	Passeriformes		Parulidae		Setophaga citrina	0.922168	0.76	True
Aves	Passeriformes		Parulidae		Setophaga coronata	0.922168	0.76	True
Aves	Passeriformes		Parulidae		Setophaga discolor	0.922168	0.76	True
Aves	Passeriformes		Parulidae		Setophaga dominica	0.922168	0.76	True
Aves	Passeriformes		Parulidae		Setophaga fusca	0.922168	0.76	True
Aves	Passeriformes		Parulidae		Setophaga graciae	0.922168	0.76	True
Aves	Passeriformes		Parulidae		Setophaga kirtlandii	0.922168	0.76	True
Aves	Passeriformes		Parulidae		Setophaga magnolia	0.922168	0.76	True
Aves	Passeriformes		Parulidae		Setophaga nigrescens	0.922168	0.76	True
Aves	Passeriformes		Parulidae		Setophaga occidentalis	0.922168	0.76	True
Aves	Passeriformes		Parulidae		Setophaga palmarum	0.922168	0.76	True
Aves	Passeriformes		Parulidae		Setophaga pensylvanica	0.922168	0.76	True
Aves	Passeriformes		Parulidae		Setophaga petechia	0.922168	0.76	True
Aves	Passeriformes		Parulidae		Setophaga pharetra	0.922168	0.76	True
Aves	Passeriformes		Parulidae		Setophaga pinus	0.922168	0.76	True
Aves	Passeriformes		Parulidae		Setophaga pitiayumi	0.922168	0.76	True
Aves	Passeriformes		Parulidae		Setophaga pityophila	0.922168	0.76	True
Aves	Passeriformes		Parulidae		Setophaga plumbea	0.922168	0.76	True
Aves	Passeriformes		Parulidae		Setophaga ruticilla	0.922168	0.76	True
Aves	Passeriformes		Parulidae		Setophaga striata	0.922168	0.76	True
Aves	Passeriformes		Parulidae		Setophaga tigrina	0.922168	0.76	True
Aves	Passeriformes		Parulidae		Setophaga townsendi	0.922168	0.76	True
Aves	Passeriformes		Parulidae		Setophaga virens	0.922168	0.76	True
Aves	Passeriformes		Parulidae		Setophaga vitellina	0.922168	0.76	True
Aves	Passeriformes		Icteridae		Sturnella bellicosa	0.922168	0.76	True
Aves	Passeriformes		Icteridae		Sturnella loyca	0.922168	0.76	True
Aves	Passeriformes		Icteridae		Sturnella magna	0.922168	0.76	True
Aves	Passeriformes		Icteridae		Sturnella militaris	0.922168	0.76	True
Aves	Passeriformes		Icteridae		Sturnella neglecta	0.922168	0.76	True
Aves	Passeriformes		Icteridae		Sturnella superciliaris	0.922168	0.76	True
Aves	Passeriformes		Parulidae		Teretistris fernandinae	0.922168	0.76	True
Aves	Passeriformes		Parulidae		Vermivora bachmanii	0.922168	0.76	True
Aves	Passeriformes		Parulidae		Vermivora chrysoptera	0.922168	0.76	True
Aves	Passeriformes		Parulidae		Vermivora cyanoptera	0.922168	0.76	True
Aves	Passeriformes		Icteridae		Xanthocephalus xanthocephalus	0.922168	0.76	True
Aves	Passeriformes		Icteridae		Xanthopsar flavus	0.922168	0.76	True
Aves	Passeriformes		Parulidae		Xenoligea montana	0.922168	0.76	True
Aves	Passeriformes		Parulidae		Zeledonia coronata	0.922168	0.76	True
Aves	Passeriformes		Thraupidae		Acanthidops bairdii	0.918726	0.76	True
Aves	Passeriformes		Emberizidae		Aimophila carpalis	0.918726	0.76	True
Aves	Passeriformes		Emberizidae		Aimophila cassinii	0.918726	0.76	True
Aves	Passeriformes		Emberizidae		Aimophila humeralis	0.918726	0.76	True
Aves	Passeriformes		Emberizidae		Aimophila mystacalis	0.918726	0.76	True
Aves	Passeriformes		Emberizidae		Aimophila notosticta	0.918726	0.76	True
Aves	Passeriformes		Emberizidae		Aimophila quinquestriata	0.918726	0.76	True
Aves	Passeriformes		Emberizidae		Aimophila rufescens	0.918726	0.76	True
Aves	Passeriformes		Emberizidae		Aimophila ruficauda	0.918726	0.76	True
Aves	Passeriformes		Emberizidae		Aimophila ruficeps	0.918726	0.76	True
Aves	Passeriformes		Emberizidae		Aimophila stolzmanni	0.918726	0.76	True
Aves	Passeriformes		Emberizidae		Aimophila strigiceps	0.918726	0.76	True
Aves	Passeriformes		Emberizidae		Aimophila sumichrasti	0.918726	0.76	True
Aves	Passeriformes		Cardinalidae		Amaurospiza concolor	0.918726	0.76	True
Aves	Passeriformes		Emberizidae		Ammodramus aurifrons	0.918726	0.76	True
Aves	Passeriformes		Emberizidae		Ammodramus bairdii	0.918726	0.76	True
Aves	Passeriformes		Emberizidae		Ammodramus caudacutus	0.918726	0.76	True
Aves	Passeriformes		Emberizidae		Ammodramus henslowii	0.918726	0.76	True
Aves	Passeriformes		Emberizidae		Ammodramus humeralis	0.918726	0.76	True
Aves	Passeriformes		Emberizidae		Ammodramus leconteii	0.918726	0.76	True
Aves	Passeriformes		Emberizidae		Ammodramus maritimus	0.918726	0.76	True
Aves	Passeriformes		Emberizidae		Ammodramus nelsoni	0.918726	0.76	True
Aves	Passeriformes		Emberizidae		Ammodramus savannarum	0.918726	0.76	True
Aves	Passeriformes		Emberizidae		Amphispiza belli	0.918726	0.76	True
Aves	Passeriformes		Emberizidae		Amphispiza bilineata	0.918726	0.76	True
Aves	Passeriformes		Thraupidae		Anisognathus igniventris	0.918726	0.76	True
Aves	Passeriformes		Thraupidae		Anisognathus lacrymosus	0.918726	0.76	True
Aves	Passeriformes		Thraupidae		Anisognathus melanogenys	0.918726	0.76	True
Aves	Passeriformes		Thraupidae		Anisognathus notabilis	0.918726	0.76	True
Aves	Passeriformes		Thraupidae		Anisognathus somptuosus	0.918726	0.76	True
Aves	Passeriformes		Emberizidae		Arremon aurantiirostris	0.918726	0.76	True
Aves	Passeriformes		Emberizidae		Arremon brunneinucha	0.918726	0.76	True
Aves	Passeriformes		Emberizidae		Arremon castaneiceps	0.918726	0.76	True
Aves	Passeriformes		Emberizidae		Arremon flavirostris	0.918726	0.76	True
Aves	Passeriformes		Emberizidae		Arremon schlegeli	0.918726	0.76	True
Aves	Passeriformes		Emberizidae		Arremon taciturnus	0.918726	0.76	True
Aves	Passeriformes		Emberizidae		Arremonops chloronotus	0.918726	0.76	True
Aves	Passeriformes		Emberizidae		Arremonops conirostris	0.918726	0.76	True
Aves	Passeriformes		Emberizidae		Arremonops rufivirgatus	0.918726	0.76	True
Aves	Passeriformes		Emberizidae		Atlapetes albiceps	0.918726	0.76	True
Aves	Passeriformes		Emberizidae		Atlapetes albinucha	0.918726	0.76	True
Aves	Passeriformes		Emberizidae		Atlapetes citrinellus	0.918726	0.76	True
Aves	Passeriformes		Emberizidae		Atlapetes forbesi	0.918726	0.76	True
Aves	Passeriformes		Emberizidae		Atlapetes fulviceps	0.918726	0.76	True
Aves	Passeriformes		Emberizidae		Atlapetes gutturalis	0.918726	0.76	True
Aves	Passeriformes		Emberizidae		Atlapetes latinuchus	0.918726	0.76	True
Aves	Passeriformes		Emberizidae		Atlapetes leucopis	0.918726	0.76	True
Aves	Passeriformes		Emberizidae		Atlapetes melanolaemus	0.918726	0.76	True
Aves	Passeriformes		Emberizidae		Atlapetes melanopsis	0.918726	0.76	True
Aves	Passeriformes		Emberizidae		Atlapetes nationi	0.918726	0.76	True
Aves	Passeriformes		Emberizidae		Atlapetes pallidiceps	0.918726	0.76	True
Aves	Passeriformes		Emberizidae		Atlapetes pallidinucha	0.918726	0.76	True
Aves	Passeriformes		Emberizidae		Atlapetes pileatus	0.918726	0.76	True
Aves	Passeriformes		Emberizidae		Atlapetes rufigenis	0.918726	0.76	True
Aves	Passeriformes		Emberizidae		Atlapetes rufinucha	0.918726	0.76	True
Aves	Passeriformes		Emberizidae		Atlapetes schistaceus	0.918726	0.76	True
Aves	Passeriformes		Emberizidae		Atlapetes seebohmi	0.918726	0.76	True
Aves	Passeriformes		Emberizidae		Atlapetes tricolor	0.918726	0.76	True
Aves	Passeriformes		Thraupidae		Bangsia arcaei	0.918726	0.76	True
Aves	Passeriformes		Thraupidae		Bangsia aureocincta	0.918726	0.76	True
Aves	Passeriformes		Thraupidae		Bangsia edwardsi	0.918726	0.76	True
Aves	Passeriformes		Thraupidae		Bangsia melanochlamys	0.918726	0.76	True
Aves	Passeriformes		Thraupidae		Bangsia rothschildi	0.918726	0.76	True
Aves	Passeriformes		Thraupidae		Buthraupis aureodorsalis	0.918726	0.76	True
Aves	Passeriformes		Thraupidae		Buthraupis eximia	0.918726	0.76	True
Aves	Passeriformes		Thraupidae		Buthraupis montana	0.918726	0.76	True
Aves	Passeriformes		Thraupidae		Buthraupis wetmorei	0.918726	0.76	True
Aves	Passeriformes		Emberizidae		Calamospiza melanocorys	0.918726	0.76	True
Aves	Passeriformes		Thraupidae		Calochaetes coccineus	0.918726	0.76	True
Aves	Passeriformes		Thraupidae		Calyptophilus frugivorus	0.918726	0.76	True
Aves	Passeriformes		Thraupidae		Calyptophilus tertius	0.918726	0.76	True
Aves	Passeriformes		Thraupidae		Camarhynchus heliobates	0.918726	0.76	True
Aves	Passeriformes		Thraupidae		Camarhynchus pallidus	0.918726	0.76	True
Aves	Passeriformes		Thraupidae		Camarhynchus parvulus	0.918726	0.76	True
Aves	Passeriformes		Thraupidae		Camarhynchus pauper	0.918726	0.76	True
Aves	Passeriformes		Thraupidae		Camarhynchus psittacula	0.918726	0.76	True
Aves	Passeriformes		Thraupidae		Catamblyrhynchus diadema	0.918726	0.76	True
Aves	Passeriformes		Thraupidae		Catamenia analis	0.918726	0.76	True
Aves	Passeriformes		Thraupidae		Catamenia inornata	0.918726	0.76	True
Aves	Passeriformes		Thraupidae		Certhidea olivacea	0.918726	0.76	True
Aves	Passeriformes		Thraupidae		Chlorochrysa calliparaea	0.918726	0.76	True
Aves	Passeriformes		Thraupidae		Chlorochrysa nitidissima	0.918726	0.76	True
Aves	Passeriformes		Thraupidae		Chlorochrysa phoenicotis	0.918726	0.76	True
Aves	Passeriformes		Thraupidae		Chlorornis riefferii	0.918726	0.76	True
Aves	Passeriformes		Emberizidae		Chlorospingus canigularis	0.918726	0.76	True
Aves	Passeriformes		Emberizidae		Chlorospingus flavigularis	0.918726	0.76	True
Aves	Passeriformes		Emberizidae		Chlorospingus inornatus	0.918726	0.76	True
Aves	Passeriformes		Emberizidae		Chlorospingus ophthalmicus	0.918726	0.76	True
Aves	Passeriformes		Emberizidae		Chlorospingus parvirostris	0.918726	0.76	True
Aves	Passeriformes		Emberizidae		Chlorospingus pileatus	0.918726	0.76	True
Aves	Passeriformes		Emberizidae		Chlorospingus semifuscus	0.918726	0.76	True
Aves	Passeriformes		Emberizidae		Chlorospingus tacarcunae	0.918726	0.76	True
Aves	Passeriformes		Cardinalidae		Chlorothraupis carmioli	0.918726	0.76	True
Aves	Passeriformes		Cardinalidae		Chlorothraupis olivacea	0.918726	0.76	True
Aves	Passeriformes		Cardinalidae		Chlorothraupis stolzmanni	0.918726	0.76	True
Aves	Passeriformes		Emberizidae		Chondestes grammacus	0.918726	0.76	True
Aves	Passeriformes		Thraupidae		Chrysothlypis chrysomelas	0.918726	0.76	True
Aves	Passeriformes		Thraupidae		Cissopis leverianus	0.918726	0.76	True
Aves	Passeriformes		Thraupidae		Cnemoscopus rubrirostris	0.918726	0.76	True
Aves	Passeriformes		Coerebidae		Coereba flaveola	0.918726	0.76	True
Aves	Passeriformes		Thraupidae		Conirostrum albifrons	0.918726	0.76	True
Aves	Passeriformes		Thraupidae		Conirostrum bicolor	0.918726	0.76	True
Aves	Passeriformes		Thraupidae		Conirostrum margaritae	0.918726	0.76	True
Aves	Passeriformes		Thraupidae		Conirostrum sitticolor	0.918726	0.76	True
Aves	Passeriformes		Thraupidae		Coryphospingus cucullatus	0.918726	0.76	True
Aves	Passeriformes		Thraupidae		Coryphospingus pileatus	0.918726	0.76	True
Aves	Passeriformes		Thraupidae		Creurgops dentatus	0.918726	0.76	True
Aves	Passeriformes		Thraupidae		Creurgops verticalis	0.918726	0.76	True
Aves	Passeriformes		Thraupidae		Cypsnagra hirundinacea	0.918726	0.76	True
Aves	Passeriformes		Thraupidae		Dacnis cayana	0.918726	0.76	True
Aves	Passeriformes		Thraupidae		Dacnis venusta	0.918726	0.76	True
Aves	Passeriformes		Thraupidae		Delothraupis castaneoventris	0.918726	0.76	True
Aves	Passeriformes		Thraupidae		Diglossa albilatera	0.918726	0.76	True
Aves	Passeriformes		Thraupidae		Diglossa baritula	0.918726	0.76	True
Aves	Passeriformes		Thraupidae		Diglossa brunneiventris	0.918726	0.76	True
Aves	Passeriformes		Thraupidae		Diglossa carbonaria	0.918726	0.76	True
Aves	Passeriformes		Thraupidae		Diglossa duidae	0.918726	0.76	True
Aves	Passeriformes		Thraupidae		Diglossa gloriosa	0.918726	0.76	True
Aves	Passeriformes		Thraupidae		Diglossa gloriosissima	0.918726	0.76	True
Aves	Passeriformes		Thraupidae		Diglossa humeralis	0.918726	0.76	True
Aves	Passeriformes		Thraupidae		Diglossa lafresnayii	0.918726	0.76	True
Aves	Passeriformes		Thraupidae		Diglossa major	0.918726	0.76	True
Aves	Passeriformes		Thraupidae		Diglossa mystacalis	0.918726	0.76	True
Aves	Passeriformes		Thraupidae		Diglossa plumbea	0.918726	0.76	True
Aves	Passeriformes		Thraupidae		Diglossa sittoides	0.918726	0.76	True
Aves	Passeriformes		Thraupidae		Diglossa venezuelensis	0.918726	0.76	True
Aves	Passeriformes		Thraupidae		Diglossopis caerulescens	0.918726	0.76	True
Aves	Passeriformes		Thraupidae		Diglossopis cyanea	0.918726	0.76	True
Aves	Passeriformes		Thraupidae		Diglossopis glauca	0.918726	0.76	True
Aves	Passeriformes		Thraupidae		Diglossopis indigotica	0.918726	0.76	True
Aves	Passeriformes		Thraupidae		Diuca diuca	0.918726	0.76	True
Aves	Passeriformes		Thraupidae		Dolospingus fringilloides	0.918726	0.76	True
Aves	Passeriformes		Thraupidae		Dubusia taeniata	0.918726	0.76	True
Aves	Passeriformes		Thraupidae		Emberizoides herbicola	0.918726	0.76	True
Aves	Passeriformes		Thraupidae		Emberizoides ypiranganus	0.918726	0.76	True
Aves	Passeriformes		Thraupidae		Eucometis penicillata	0.918726	0.76	True
Aves	Passeriformes		Thraupidae		Euneornis campestris	0.918726	0.76	True
Aves	Passeriformes		Thraupidae		Geospiza conirostris	0.918726	0.76	True
Aves	Passeriformes		Thraupidae		Geospiza difficilis	0.918726	0.76	True
Aves	Passeriformes		Thraupidae		Geospiza fortis	0.918726	0.76	True
Aves	Passeriformes		Thraupidae		Geospiza fuliginosa	0.918726	0.76	True
Aves	Passeriformes		Thraupidae		Geospiza magnirostris	0.918726	0.76	True
Aves	Passeriformes		Thraupidae		Geospiza scandens	0.918726	0.76	True
Aves	Passeriformes		Emberizidae		Gubernatrix cristata	0.918726	0.76	True
Aves	Passeriformes		Cardinalidae		Habia fuscicauda	0.918726	0.76	True
Aves	Passeriformes		Cardinalidae		Habia gutturalis	0.918726	0.76	True
Aves	Passeriformes		Cardinalidae		Habia rubica	0.918726	0.76	True
Aves	Passeriformes		Thraupidae		Haplospiza rustica	0.918726	0.76	True
Aves	Passeriformes		Thraupidae		Haplospiza unicolor	0.918726	0.76	True
Aves	Passeriformes		Thraupidae		Hemithraupis flavicollis	0.918726	0.76	True
Aves	Passeriformes		Thraupidae		Heterospingus rubrifrons	0.918726	0.76	True
Aves	Passeriformes		Thraupidae		Heterospingus xanthopygius	0.918726	0.76	True
Aves	Passeriformes		Thraupidae		Idiopsar brachyurus	0.918726	0.76	True
Aves	Passeriformes		Thraupidae		Iridosornis analis	0.918726	0.76	True
Aves	Passeriformes		Thraupidae		Iridosornis jelskii	0.918726	0.76	True
Aves	Passeriformes		Thraupidae		Iridosornis porphyrocephalus	0.918726	0.76	True
Aves	Passeriformes		Thraupidae		Iridosornis reinhardti	0.918726	0.76	True
Aves	Passeriformes		Thraupidae		Iridosornis rufivertex	0.918726	0.76	True
Aves	Passeriformes		Emberizidae		Junco hyemalis	0.918726	0.76	True
Aves	Passeriformes		Emberizidae		Junco phaeonotus	0.918726	0.76	True
Aves	Passeriformes		Passerellidae		Kieneria aberti	0.918726	0.76	True
Aves	Passeriformes		Passerellidae		Kieneria albicollis	0.918726	0.76	True
Aves	Passeriformes		Passerellidae		Kieneria crissalis	0.918726	0.76	True
Aves	Passeriformes		Passerellidae		Kieneria fusca	0.918726	0.76	True
Aves	Passeriformes		Thraupidae		Lamprospiza melanoleuca	0.918726	0.76	True
Aves	Passeriformes		Thraupidae		Lanio aurantius	0.918726	0.76	True
Aves	Passeriformes		Thraupidae		Lanio fulvus	0.918726	0.76	True
Aves	Passeriformes		Thraupidae		Lanio leucothorax	0.918726	0.76	True
Aves	Passeriformes		Thraupidae		Lanio versicolor	0.918726	0.76	True
Aves	Passeriformes		Thraupidae		Lophospingus griseocristatus	0.918726	0.76	True
Aves	Passeriformes		Thraupidae		Lophospingus pusillus	0.918726	0.76	True
Aves	Passeriformes		Thraupidae		Loxigilla noctis	0.918726	0.76	True
Aves	Passeriformes		Thraupidae		Loxigilla portoricensis	0.918726	0.76	True
Aves	Passeriformes		Thraupidae		Loxigilla violacea	0.918726	0.76	True
Aves	Passeriformes		Thraupidae		Loxipasser anoxanthus	0.918726	0.76	True
Aves	Passeriformes		Thraupidae		Melanodera melanodera	0.918726	0.76	True
Aves	Passeriformes		Thraupidae		Melanodera xanthogramma	0.918726	0.76	True
Aves	Passeriformes		Thraupidae		Melanospiza richardsoni	0.918726	0.76	True
Aves	Passeriformes		Emberizidae		Melospiza georgiana	0.918726	0.76	True
Aves	Passeriformes		Emberizidae		Melospiza lincolnii	0.918726	0.76	True
Aves	Passeriformes		Emberizidae		Melospiza melodia	0.918726	0.76	True
Aves	Passeriformes		Emberizidae		Melozone biarcuatum	0.918726	0.76	True
Aves	Passeriformes		Emberizidae		Melozone kieneri	0.918726	0.76	True
Aves	Passeriformes		Emberizidae		Melozone leucotis	0.918726	0.76	True
Aves	Passeriformes		Thraupidae		Mitrospingus cassinii	0.918726	0.76	True
Aves	Passeriformes		Thraupidae		Mitrospingus oleagineus	0.918726	0.76	True
Aves	Passeriformes		Thraupidae		Nemosia pileata	0.918726	0.76	True
Aves	Passeriformes		Thraupidae		Neothraupis fasciata	0.918726	0.76	True
Aves	Passeriformes		Thraupidae		Nephelornis oneilli	0.918726	0.76	True
Aves	Passeriformes		Thraupidae		Nesospiza acunhae	0.918726	0.76	True
Aves	Passeriformes		Thraupidae		Nesospiza questi	0.918726	0.76	True
Aves	Passeriformes		Thraupidae		Nesospiza wilkinsi	0.918726	0.76	True
Aves	Passeriformes		Thraupidae		Oreomanes fraseri	0.918726	0.76	True
Aves	Passeriformes		Emberizidae		Oriturus superciliosus	0.918726	0.76	True
Aves	Passeriformes		Thraupidae		Oryzoborus angolensis	0.918726	0.76	True
Aves	Passeriformes		Thraupidae		Oryzoborus crassirostris	0.918726	0.76	True
Aves	Passeriformes		Thraupidae		Oryzoborus funereus	0.918726	0.76	True
Aves	Passeriformes		Thraupidae		Oryzoborus maximiliani	0.918726	0.76	True
Aves	Passeriformes		Thraupidae		Paroaria baeri	0.918726	0.76	True
Aves	Passeriformes		Thraupidae		Paroaria capitata	0.918726	0.76	True
Aves	Passeriformes		Thraupidae		Paroaria coronata	0.918726	0.76	True
Aves	Passeriformes		Thraupidae		Paroaria dominicana	0.918726	0.76	True
Aves	Passeriformes		Thraupidae		Paroaria gularis	0.918726	0.76	True
Aves	Passeriformes		Emberizidae		Passerculus sandwichensis	0.918726	0.76	True
Aves	Passeriformes		Emberizidae		Passerella iliaca	0.918726	0.76	True
Aves	Passeriformes		Emberizidae		Pezopetes capitalis	0.918726	0.76	True
Aves	Passeriformes		Thraupidae		Phaenicophilus palmarum	0.918726	0.76	True
Aves	Passeriformes		Thraupidae		Phaenicophilus poliocephalus	0.918726	0.76	True
Aves	Passeriformes		Thraupidae		Phrygilus alaudinus	0.918726	0.76	True
Aves	Passeriformes		Thraupidae		Phrygilus atriceps	0.918726	0.76	True
Aves	Passeriformes		Thraupidae		Phrygilus carbonarius	0.918726	0.76	True
Aves	Passeriformes		Thraupidae		Phrygilus dorsalis	0.918726	0.76	True
Aves	Passeriformes		Thraupidae		Phrygilus fruticeti	0.918726	0.76	True
Aves	Passeriformes		Thraupidae		Phrygilus gayi	0.918726	0.76	True
Aves	Passeriformes		Thraupidae		Phrygilus patagonicus	0.918726	0.76	True
Aves	Passeriformes		Thraupidae		Phrygilus plebejus	0.918726	0.76	True
Aves	Passeriformes		Thraupidae		Phrygilus unicolor	0.918726	0.76	True
Aves	Passeriformes		Thraupidae		Piezorhina cinerea	0.918726	0.76	True
Aves	Passeriformes		Thraupidae		Pinaroloxias inornata	0.918726	0.76	True
Aves	Passeriformes		Emberizidae		Pipilo chlorurus	0.918726	0.76	True
Aves	Passeriformes		Emberizidae		Pipilo erythrophthalmus	0.918726	0.76	True
Aves	Passeriformes		Emberizidae		Pipilo maculatus	0.918726	0.76	True
Aves	Passeriformes		Emberizidae		Pipilo ocai	0.918726	0.76	True
Aves	Passeriformes		Thraupidae		Pipraeidea melanonota	0.918726	0.76	True
Aves	Passeriformes		Cardinalidae		Piranga bidentata	0.918726	0.76	True
Aves	Passeriformes		Cardinalidae		Piranga erythrocephala	0.918726	0.76	True
Aves	Passeriformes		Cardinalidae		Piranga flava	0.918726	0.76	True
Aves	Passeriformes		Cardinalidae		Piranga leucoptera	0.918726	0.76	True
Aves	Passeriformes		Cardinalidae		Piranga ludoviciana	0.918726	0.76	True
Aves	Passeriformes		Cardinalidae		Piranga olivacea	0.918726	0.76	True
Aves	Passeriformes		Cardinalidae		Piranga roseogularis	0.918726	0.76	True
Aves	Passeriformes		Cardinalidae		Piranga rubra	0.918726	0.76	True
Aves	Passeriformes		Cardinalidae		Piranga rubriceps	0.918726	0.76	True
Aves	Passeriformes		Emberizidae		Pooecetes gramineus	0.918726	0.76	True
Aves	Passeriformes		Thraupidae		Poospiza alticola	0.918726	0.76	True
Aves	Passeriformes		Thraupidae		Poospiza baeri	0.918726	0.76	True
Aves	Passeriformes		Thraupidae		Poospiza boliviana	0.918726	0.76	True
Aves	Passeriformes		Thraupidae		Poospiza caesar	0.918726	0.76	True
Aves	Passeriformes		Thraupidae		Poospiza cinerea	0.918726	0.76	True
Aves	Passeriformes		Thraupidae		Poospiza erythrophrys	0.918726	0.76	True
Aves	Passeriformes		Thraupidae		Poospiza garleppi	0.918726	0.76	True
Aves	Passeriformes		Thraupidae		Poospiza hispaniolensis	0.918726	0.76	True
Aves	Passeriformes		Thraupidae		Poospiza hypochondria	0.918726	0.76	True
Aves	Passeriformes		Thraupidae		Poospiza lateralis	0.918726	0.76	True
Aves	Passeriformes		Thraupidae		Poospiza melanoleuca	0.918726	0.76	True
Aves	Passeriformes		Thraupidae		Poospiza ornata	0.918726	0.76	True
Aves	Passeriformes		Thraupidae		Poospiza torquata	0.918726	0.76	True
Aves	Passeriformes		Thraupidae		Poospiza whitii	0.918726	0.76	True
Aves	Passeriformes		Emberizidae		Pselliophorus luteoviridis	0.918726	0.76	True
Aves	Passeriformes		Emberizidae		Pselliophorus tibialis	0.918726	0.76	True
Aves	Passeriformes		Thraupidae		Pyrrhocoma ruficeps	0.918726	0.76	True
Aves	Passeriformes		Thraupidae		Ramphocelus bresilius	0.918726	0.76	True
Aves	Passeriformes		Thraupidae		Ramphocelus carbo	0.918726	0.76	True
Aves	Passeriformes		Thraupidae		Ramphocelus costaricensis	0.918726	0.76	True
Aves	Passeriformes		Thraupidae		Ramphocelus dimidiatus	0.918726	0.76	True
Aves	Passeriformes		Thraupidae		Ramphocelus flammigerus	0.918726	0.76	True
Aves	Passeriformes		Thraupidae		Ramphocelus icteronotus	0.918726	0.76	True
Aves	Passeriformes		Thraupidae		Ramphocelus melanogaster	0.918726	0.76	True
Aves	Passeriformes		Thraupidae		Ramphocelus nigrogularis	0.918726	0.76	True
Aves	Passeriformes		Thraupidae		Ramphocelus passerinii	0.918726	0.76	True
Aves	Passeriformes		Thraupidae		Ramphocelus sanguinolentus	0.918726	0.76	True
Aves	Passeriformes		Thraupidae		Rhodinocichla rosea	0.918726	0.76	True
Aves	Passeriformes		Thraupidae		Rhodospingus cruentus	0.918726	0.76	True
Aves	Passeriformes		Cardinalidae		Saltator albicollis	0.918726	0.76	True
Aves	Passeriformes		Cardinalidae		Saltator atriceps	0.918726	0.76	True
Aves	Passeriformes		Cardinalidae		Saltator atricollis	0.918726	0.76	True
Aves	Passeriformes		Cardinalidae		Saltator atripennis	0.918726	0.76	True
Aves	Passeriformes		Cardinalidae		Saltator aurantiirostris	0.918726	0.76	True
Aves	Passeriformes		Cardinalidae		Saltator cinctus	0.918726	0.76	True
Aves	Passeriformes		Cardinalidae		Saltator coerulescens	0.918726	0.76	True
Aves	Passeriformes		Cardinalidae		Saltator fuliginosus	0.918726	0.76	True
Aves	Passeriformes		Cardinalidae		Saltator grossus	0.918726	0.76	True
Aves	Passeriformes		Cardinalidae		Saltator maxillosus	0.918726	0.76	True
Aves	Passeriformes		Cardinalidae		Saltator maximus	0.918726	0.76	True
Aves	Passeriformes		Cardinalidae		Saltator nigriceps	0.918726	0.76	True
Aves	Passeriformes		Cardinalidae		Saltator orenocensis	0.918726	0.76	True
Aves	Passeriformes		Cardinalidae		Saltator rufiventris	0.918726	0.76	True
Aves	Passeriformes		Cardinalidae		Saltator similis	0.918726	0.76	True
Aves	Passeriformes		Cardinalidae		Saltator striatipectus	0.918726	0.76	True
Aves	Passeriformes		Thraupidae		Saltatricula multicolor	0.918726	0.76	True
Aves	Passeriformes		Thraupidae		Schistochlamys melanopis	0.918726	0.76	True
Aves	Passeriformes		Thraupidae		Schistochlamys ruficapillus	0.918726	0.76	True
Aves	Passeriformes		Thraupidae		Sericossypha albocristata	0.918726	0.76	True
Aves	Passeriformes		Thraupidae		Sicalis flaveola	0.918726	0.76	True
Aves	Passeriformes		Thraupidae		Sicalis lutea	0.918726	0.76	True
Aves	Passeriformes		Thraupidae		Sicalis luteocephala	0.918726	0.76	True
Aves	Passeriformes		Thraupidae		Sicalis luteola	0.918726	0.76	True
Aves	Passeriformes		Thraupidae		Sicalis olivascens	0.918726	0.76	True
Aves	Passeriformes		Thraupidae		Spindalis dominicensis	0.918726	0.76	True
Aves	Passeriformes		Thraupidae		Spindalis zena	0.918726	0.76	True
Aves	Passeriformes		Emberizidae		Spizella arborea	0.918726	0.76	True
Aves	Passeriformes		Emberizidae		Spizella atrogularis	0.918726	0.76	True
Aves	Passeriformes		Emberizidae		Spizella breweri	0.918726	0.76	True
Aves	Passeriformes		Emberizidae		Spizella pallida	0.918726	0.76	True
Aves	Passeriformes		Emberizidae		Spizella passerina	0.918726	0.76	True
Aves	Passeriformes		Emberizidae		Spizella pusilla	0.918726	0.76	True
Aves	Passeriformes		Emberizidae		Spizella wortheni	0.918726	0.76	True
Aves	Passeriformes		Thraupidae		Sporophila americana	0.918726	0.76	True
Aves	Passeriformes		Thraupidae		Sporophila bouvreuil	0.918726	0.76	True
Aves	Passeriformes		Thraupidae		Sporophila caerulescens	0.918726	0.76	True
Aves	Passeriformes		Thraupidae		Sporophila castaneiventris	0.918726	0.76	True
Aves	Passeriformes		Thraupidae		Sporophila cinnamomea	0.918726	0.76	True
Aves	Passeriformes		Thraupidae		Sporophila collaris	0.918726	0.76	True
Aves	Passeriformes		Thraupidae		Sporophila corvina	0.918726	0.76	True
Aves	Passeriformes		Thraupidae		Sporophila falcirostris	0.918726	0.76	True
Aves	Passeriformes		Thraupidae		Sporophila hypochroma	0.918726	0.76	True
Aves	Passeriformes		Thraupidae		Sporophila hypoxantha	0.918726	0.76	True
Aves	Passeriformes		Thraupidae		Sporophila intermedia	0.918726	0.76	True
Aves	Passeriformes		Thraupidae		Sporophila leucoptera	0.918726	0.76	True
Aves	Passeriformes		Thraupidae		Sporophila luctuosa	0.918726	0.76	True
Aves	Passeriformes		Thraupidae		Sporophila melanogaster	0.918726	0.76	True
Aves	Passeriformes		Thraupidae		Sporophila minuta	0.918726	0.76	True
Aves	Passeriformes		Thraupidae		Sporophila nigricollis	0.918726	0.76	True
Aves	Passeriformes		Thraupidae		Sporophila nigrorufa	0.918726	0.76	True
Aves	Passeriformes		Thraupidae		Sporophila palustris	0.918726	0.76	True
Aves	Passeriformes		Thraupidae		Sporophila plumbea	0.918726	0.76	True
Aves	Passeriformes		Thraupidae		Sporophila ruficollis	0.918726	0.76	True
Aves	Passeriformes		Thraupidae		Sporophila schistacea	0.918726	0.76	True
Aves	Passeriformes		Thraupidae		Sporophila telasco	0.918726	0.76	True
Aves	Passeriformes		Thraupidae		Sporophila torqueola	0.918726	0.76	True
Aves	Passeriformes		Thraupidae		Stephanophorus diadematus	0.918726	0.76	True
Aves	Passeriformes		Thraupidae		Tachyphonus coronatus	0.918726	0.76	True
Aves	Passeriformes		Thraupidae		Tachyphonus cristatus	0.918726	0.76	True
Aves	Passeriformes		Thraupidae		Tachyphonus delatrii	0.918726	0.76	True
Aves	Passeriformes		Thraupidae		Tachyphonus luctuosus	0.918726	0.76	True
Aves	Passeriformes		Thraupidae		Tachyphonus phoenicius	0.918726	0.76	True
Aves	Passeriformes		Thraupidae		Tachyphonus rufiventer	0.918726	0.76	True
Aves	Passeriformes		Thraupidae		Tachyphonus rufus	0.918726	0.76	True
Aves	Passeriformes		Thraupidae		Tachyphonus surinamus	0.918726	0.76	True
Aves	Passeriformes		Thraupidae	Thraupinae	Tangara abbas	0.918726	0.76	True
Aves	Passeriformes		Thraupidae		Tangara argyrofenges	0.918726	0.76	True
Aves	Passeriformes		Thraupidae		Tangara arthus	0.918726	0.76	True
Aves	Passeriformes		Thraupidae		Tangara callophrys	0.918726	0.76	True
Aves	Passeriformes		Thraupidae		Tangara cayana	0.918726	0.76	True
Aves	Passeriformes		Thraupidae		Tangara chilensis	0.918726	0.76	True
Aves	Passeriformes		Thraupidae		Tangara chrysotis	0.918726	0.76	True
Aves	Passeriformes		Thraupidae		Tangara cucullata	0.918726	0.76	True
Aves	Passeriformes		Thraupidae		Tangara cyanicollis	0.918726	0.76	True
Aves	Passeriformes		Thraupidae		Tangara cyanocephala	0.918726	0.76	True
Aves	Passeriformes		Thraupidae		Tangara cyanoptera	0.918726	0.76	True
Aves	Passeriformes		Thraupidae		Tangara cyanotis	0.918726	0.76	True
Aves	Passeriformes		Thraupidae		Tangara cyanoventris	0.918726	0.76	True
Aves	Passeriformes		Thraupidae		Tangara desmaresti	0.918726	0.76	True
Aves	Passeriformes		Thraupidae		Tangara dowii	0.918726	0.76	True
Aves	Passeriformes		Thraupidae	Thraupinae	Tangara episcopus	0.918726	0.76	True
Aves	Passeriformes		Thraupidae		Tangara fastuosa	0.918726	0.76	True
Aves	Passeriformes		Thraupidae		Tangara florida	0.918726	0.76	True
Aves	Passeriformes		Thraupidae		Tangara fucosa	0.918726	0.76	True
Aves	Passeriformes		Thraupidae		Tangara guttata	0.918726	0.76	True
Aves	Passeriformes		Thraupidae		Tangara gyrola	0.918726	0.76	True
Aves	Passeriformes		Thraupidae		Tangara heinei	0.918726	0.76	True
Aves	Passeriformes		Thraupidae		Tangara icterocephala	0.918726	0.76	True
Aves	Passeriformes		Thraupidae		Tangara inornata	0.918726	0.76	True
Aves	Passeriformes		Thraupidae		Tangara johannae	0.918726	0.76	True
Aves	Passeriformes		Thraupidae		Tangara labradorides	0.918726	0.76	True
Aves	Passeriformes		Thraupidae		Tangara larvata	0.918726	0.76	True
Aves	Passeriformes		Thraupidae		Tangara lavinia	0.918726	0.76	True
Aves	Passeriformes		Thraupidae		Tangara mexicana	0.918726	0.76	True
Aves	Passeriformes		Thraupidae		Tangara meyerdeschauenseei	0.918726	0.76	True
Aves	Passeriformes		Thraupidae		Tangara nigrocincta	0.918726	0.76	True
Aves	Passeriformes		Thraupidae		Tangara nigroviridis	0.918726	0.76	True
Aves	Passeriformes		Thraupidae		Tangara palmeri	0.918726	0.76	True
Aves	Passeriformes		Thraupidae		Tangara parzudakii	0.918726	0.76	True
Aves	Passeriformes		Thraupidae		Tangara preciosa	0.918726	0.76	True
Aves	Passeriformes		Thraupidae		Tangara pulcherrima	0.918726	0.76	True
Aves	Passeriformes		Thraupidae		Tangara punctata	0.918726	0.76	True
Aves	Passeriformes		Thraupidae		Tangara ruficervix	0.918726	0.76	True
Aves	Passeriformes		Thraupidae		Tangara rufigula	0.918726	0.76	True
Aves	Passeriformes		Thraupidae		Tangara schrankii	0.918726	0.76	True
Aves	Passeriformes		Thraupidae		Tangara seledon	0.918726	0.76	True
Aves	Passeriformes		Thraupidae		Tangara varia	0.918726	0.76	True
Aves	Passeriformes		Thraupidae		Tangara vassorii	0.918726	0.76	True
Aves	Passeriformes		Thraupidae		Tangara velia	0.918726	0.76	True
Aves	Passeriformes		Thraupidae		Tangara viridicollis	0.918726	0.76	True
Aves	Passeriformes		Thraupidae		Tangara vitriolina	0.918726	0.76	True
Aves	Passeriformes		Thraupidae		Tangara xanthocephala	0.918726	0.76	True
Aves	Passeriformes		Thraupidae		Tangara xanthogastra	0.918726	0.76	True
Aves	Passeriformes		Thraupidae		Thlypopsis ruficeps	0.918726	0.76	True
Aves	Passeriformes		Thraupidae		Thlypopsis sordida	0.918726	0.76	True
Aves	Passeriformes		Thraupidae		Thraupis bonariensis	0.918726	0.76	True
Aves	Passeriformes		Thraupidae		Thraupis cyanocephala	0.918726	0.76	True
Aves	Passeriformes		Thraupidae		Thraupis cyanoptera	0.918726	0.76	True
Aves	Passeriformes		Thraupidae		Thraupis ornata	0.918726	0.76	True
Aves	Passeriformes		Thraupidae		Thraupis palmarum	0.918726	0.76	True
Aves	Passeriformes		Thraupidae		Thraupis sayaca	0.918726	0.76	True
Aves	Passeriformes		Thraupidae		Tiaris bicolor	0.918726	0.76	True
Aves	Passeriformes		Thraupidae		Tiaris canora	0.918726	0.76	True
Aves	Passeriformes		Thraupidae		Tiaris fuliginosus	0.918726	0.76	True
Aves	Passeriformes		Thraupidae		Tiaris obscura	0.918726	0.76	True
Aves	Passeriformes		Thraupidae		Tiaris olivaceus	0.918726	0.76	True
Aves	Passeriformes		Thraupidae		Trichothraupis melanops	0.918726	0.76	True
Aves	Passeriformes		Thraupidae		Volatinia jacarina	0.918726	0.76	True
Aves	Passeriformes		Thraupidae		Wetmorethraupis sterrhopteron	0.918726	0.76	True
Aves	Passeriformes		Thraupidae		Xenodacnis parina	0.918726	0.76	True
Aves	Passeriformes		Thraupidae		Xenospingus concolor	0.918726	0.76	True
Aves	Passeriformes		Emberizidae		Xenospiza baileyi	0.918726	0.76	True
Aves	Passeriformes		Emberizidae		Zonotrichia albicollis	0.918726	0.76	True
Aves	Passeriformes		Emberizidae		Zonotrichia atricapilla	0.918726	0.76	True
Aves	Passeriformes		Emberizidae		Zonotrichia capensis	0.918726	0.76	True
Aves	Passeriformes		Emberizidae		Zonotrichia leucophrys	0.918726	0.76	True
Aves	Passeriformes		Emberizidae		Zonotrichia querula	0.918726	0.76	True
Aves	Falconiformes		Falconidae	Polyborinae	Caracara cheriway	0.91829	0.76	True
Aves	Falconiformes		Falconidae	Polyborinae	Caracara plancus	0.91829	0.76	True
Aves	Falconiformes		Falconidae	Polyborinae	Daptrius americanus	0.91829	0.76	True
Aves	Falconiformes		Falconidae	Polyborinae	Daptrius ater	0.91829	0.76	True
Aves	Falconiformes		Falconidae	Falconinae	Falco alopex	0.91829	0.76	True
Aves	Falconiformes		Falconidae	Falconinae	Falco amurensis	0.91829	0.76	True
Aves	Falconiformes		Falconidae	Falconinae	Falco araeus	0.91829	0.76	True
Aves	Falconiformes		Falconidae	Falconinae	Falco ardosiaceus	0.91829	0.76	True
Aves	Falconiformes		Falconidae	Falconinae	Falco berigora	0.91829	0.76	True
Aves	Falconiformes		Falconidae	Falconinae	Falco biarmicus	0.91829	0.76	True
Aves	Falconiformes		Falconidae	Falconinae	Falco cenchroides	0.91829	0.76	True
Aves	Falconiformes		Falconidae	Falconinae	Falco cherrug	0.91829	0.76	True
Aves	Falconiformes		Falconidae	Falconinae	Falco chicquera	0.91829	0.76	True
Aves	Falconiformes		Falconidae	Falconinae	Falco columbarius	0.91829	0.76	True
Aves	Falconiformes		Falconidae	Falconinae	Falco concolor	0.91829	0.76	True
Aves	Falconiformes		Falconidae	Falconinae	Falco cuvierii	0.91829	0.76	True
Aves	Falconiformes		Falconidae	Falconinae	Falco deiroleucus	0.91829	0.76	True
Aves	Falconiformes		Falconidae	Falconinae	Falco dickinsoni	0.91829	0.76	True
Aves	Falconiformes		Falconidae	Falconinae	Falco eleonorae	0.91829	0.76	True
Aves	Falconiformes		Falconidae	Falconinae	Falco fasciinucha	0.91829	0.76	True
Aves	Falconiformes		Falconidae	Falconinae	Falco femoralis	0.91829	0.76	True
Aves	Falconiformes		Falconidae	Falconinae	Falco hypoleucos	0.91829	0.76	True
Aves	Falconiformes		Falconidae	Falconinae	Falco jugger	0.91829	0.76	True
Aves	Falconiformes		Falconidae	Falconinae	Falco longipennis	0.91829	0.76	True
Aves	Falconiformes		Falconidae	Falconinae	Falco mexicanus	0.91829	0.76	True
Aves	Falconiformes		Falconidae	Falconinae	Falco moluccensis	0.91829	0.76	True
Aves	Falconiformes		Falconidae	Falconinae	Falco naumanni	0.91829	0.76	True
Aves	Falconiformes		Falconidae	Falconinae	Falco newtoni	0.91829	0.76	True
Aves	Falconiformes		Falconidae	Falconinae	Falco novaeseelandiae	0.91829	0.76	True
Aves	Falconiformes		Falconidae	Falconinae	Falco pelegrinoides	0.91829	0.76	True
Aves	Falconiformes		Falconidae	Falconinae	Falco peregrinus	0.91829	0.76	True
Aves	Falconiformes		Falconidae	Falconinae	Falco punctatus	0.91829	0.76	True
Aves	Falconiformes		Falconidae	Falconinae	Falco rufigularis	0.91829	0.76	True
Aves	Falconiformes		Falconidae	Falconinae	Falco rupicoloides	0.91829	0.76	True
Aves	Falconiformes		Falconidae	Falconinae	Falco rupicolus	0.91829	0.76	True
Aves	Falconiformes		Falconidae	Falconinae	Falco rusticolus	0.91829	0.76	True
Aves	Falconiformes		Falconidae	Falconinae	Falco severus	0.91829	0.76	True
Aves	Falconiformes		Falconidae	Falconinae	Falco subbuteo	0.91829	0.76	True
Aves	Falconiformes		Falconidae	Falconinae	Falco subniger	0.91829	0.76	True
Aves	Falconiformes		Falconidae	Falconinae	Falco tinnunculus	0.91829	0.76	True
Aves	Falconiformes		Falconidae	Falconinae	Falco vespertinus	0.91829	0.76	True
Aves	Falconiformes		Falconidae	Falconinae	Falco zoniventris	0.91829	0.76	True
Aves	Falconiformes		Falconidae	Polyborinae	Herpetotheres cachinnans	0.91829	0.76	True
Aves	Falconiformes		Falconidae	Polyborinae	Micrastur buckleyi	0.91829	0.76	True
Aves	Falconiformes		Falconidae	Polyborinae	Micrastur gilvicollis	0.91829	0.76	True
Aves	Falconiformes		Falconidae	Polyborinae	Micrastur mintoni	0.91829	0.76	True
Aves	Falconiformes		Falconidae	Polyborinae	Micrastur mirandollei	0.91829	0.76	True
Aves	Falconiformes		Falconidae	Polyborinae	Micrastur plumbeus	0.91829	0.76	True
Aves	Falconiformes		Falconidae	Polyborinae	Micrastur ruficollis	0.91829	0.76	True
Aves	Falconiformes		Falconidae	Polyborinae	Micrastur semitorquatus	0.91829	0.76	True
Aves	Falconiformes		Falconidae	Falconinae	Microhierax caerulescens	0.91829	0.76	True
Aves	Falconiformes		Falconidae	Falconinae	Microhierax erythrogenys	0.91829	0.76	True
Aves	Falconiformes		Falconidae	Falconinae	Microhierax fringillarius	0.91829	0.76	True
Aves	Falconiformes		Falconidae	Falconinae	Microhierax latifrons	0.91829	0.76	True
Aves	Falconiformes		Falconidae	Falconinae	Microhierax melanoleucos	0.91829	0.76	True
Aves	Falconiformes		Falconidae	Polyborinae	Milvago chimachima	0.91829	0.76	True
Aves	Falconiformes		Falconidae	Polyborinae	Milvago chimango	0.91829	0.76	True
Aves	Falconiformes		Falconidae	Polyborinae	Phalcoboenus albogularis	0.91829	0.76	True
Aves	Falconiformes		Falconidae	Polyborinae	Phalcoboenus australis	0.91829	0.76	True
Aves	Falconiformes		Falconidae	Polyborinae	Phalcoboenus carunculatus	0.91829	0.76	True
Aves	Falconiformes		Falconidae	Polyborinae	Phalcoboenus megalopterus	0.91829	0.76	True
Aves	Falconiformes		Falconidae	Falconinae	Polihierax insignis	0.91829	0.76	True
Aves	Falconiformes		Falconidae	Falconinae	Polihierax semitorquatus	0.91829	0.76	True
Aves	Falconiformes		Falconidae	Falconinae	Spiziapteryx circumcincta	0.91829	0.76	True
Aves	Procellariiformes		Procellariidae		Aphrodroma brevirostris	0.918199	0.76	True
Aves	Procellariiformes		Procellariidae		Bulweria bulwerii	0.918199	0.76	True
Aves	Procellariiformes		Procellariidae		Calonectris diomedea	0.918199	0.76	True
Aves	Procellariiformes		Procellariidae		Calonectris leucomelas	0.918199	0.76	True
Aves	Procellariiformes		Procellariidae		Daption capense	0.918199	0.76	True
Aves	Procellariiformes		Procellariidae		Fulmarus glacialis	0.918199	0.76	True
Aves	Procellariiformes		Procellariidae		Fulmarus glacialoides	0.918199	0.76	True
Aves	Procellariiformes		Procellariidae		Halobaena caerulea	0.918199	0.76	True
Aves	Procellariiformes		Procellariidae		Macronectes giganteus	0.918199	0.76	True
Aves	Procellariiformes		Procellariidae		Macronectes halli	0.918199	0.76	True
Aves	Procellariiformes		Procellariidae		Pachyptila desolata	0.918199	0.76	True
Aves	Procellariiformes		Procellariidae		Pachyptila salvini	0.918199	0.76	True
Aves	Procellariiformes		Procellariidae		Pachyptila turtur	0.918199	0.76	True
Aves	Procellariiformes		Procellariidae		Pachyptila vittata	0.918199	0.76	True
Aves	Procellariiformes		Procellariidae		Pagodroma nivea	0.918199	0.76	True
Aves	Procellariiformes		Pelecanoididae		Pelecanoides garnotii	0.918199	0.76	True
Aves	Procellariiformes		Pelecanoididae		Pelecanoides georgicus	0.918199	0.76	True
Aves	Procellariiformes		Pelecanoididae		Pelecanoides magellani	0.918199	0.76	True
Aves	Procellariiformes		Pelecanoididae		Pelecanoides urinatrix	0.918199	0.76	True
Aves	Procellariiformes		Procellariidae		Procellaria aequinoctialis	0.918199	0.76	True
Aves	Procellariiformes		Procellariidae		Procellaria cinerea	0.918199	0.76	True
Aves	Procellariiformes		Procellariidae		Procellaria parkinsoni	0.918199	0.76	True
Aves	Procellariiformes		Procellariidae		Procellaria westlandica	0.918199	0.76	True
Aves	Procellariiformes		Procellariidae		Pseudobulweria aterrima	0.918199	0.76	True
Aves	Procellariiformes		Procellariidae		Pseudobulweria rostrata	0.918199	0.76	True
Aves	Procellariiformes		Procellariidae		Pterodroma alba	0.918199	0.76	True
Aves	Procellariiformes		Procellariidae		Pterodroma arminjoniana	0.918199	0.76	True
Aves	Procellariiformes		Procellariidae		Pterodroma axillaris	0.918199	0.76	True
Aves	Procellariiformes		Procellariidae		Pterodroma baraui	0.918199	0.76	True
Aves	Procellariiformes		Procellariidae		Pterodroma cahow	0.918199	0.76	True
Aves	Procellariiformes		Procellariidae		Pterodroma cervicalis	0.918199	0.76	True
Aves	Procellariiformes		Procellariidae		Pterodroma cookii	0.918199	0.76	True
Aves	Procellariiformes		Procellariidae		Pterodroma externa	0.918199	0.76	True
Aves	Procellariiformes		Procellariidae		Pterodroma feae	0.918199	0.76	True
Aves	Procellariiformes		Procellariidae		Pterodroma hasitata	0.918199	0.76	True
Aves	Procellariiformes		Procellariidae		Pterodroma heraldica	0.918199	0.76	True
Aves	Procellariiformes		Procellariidae		Pterodroma hypoleuca	0.918199	0.76	True
Aves	Procellariiformes		Procellariidae		Pterodroma incerta	0.918199	0.76	True
Aves	Procellariiformes		Procellariidae		Pterodroma inexpectata	0.918199	0.76	True
Aves	Procellariiformes		Procellariidae		Pterodroma lessonii	0.918199	0.76	True
Aves	Procellariiformes		Procellariidae		Pterodroma longirostris	0.918199	0.76	True
Aves	Procellariiformes		Procellariidae		Pterodroma macroptera	0.918199	0.76	True
Aves	Procellariiformes		Procellariidae		Pterodroma madeira	0.918199	0.76	True
Aves	Procellariiformes		Procellariidae		Pterodroma magentae	0.918199	0.76	True
Aves	Procellariiformes		Procellariidae		Pterodroma mollis	0.918199	0.76	True
Aves	Procellariiformes		Procellariidae		Pterodroma neglecta	0.918199	0.76	True
Aves	Procellariiformes		Procellariidae		Pterodroma nigripennis	0.918199	0.76	True
Aves	Procellariiformes		Procellariidae		Pterodroma phaeopygia	0.918199	0.76	True
Aves	Procellariiformes		Procellariidae		Pterodroma rupinarum	0.918199	0.76	True
Aves	Procellariiformes		Procellariidae		Pterodroma sandwichensis	0.918199	0.76	True
Aves	Procellariiformes		Procellariidae		Pterodroma solandri	0.918199	0.76	True
Aves	Procellariiformes		Procellariidae		Puffinus assimilis	0.918199	0.76	True
Aves	Procellariiformes		Procellariidae		Puffinus bulleri	0.918199	0.76	True
Aves	Procellariiformes		Procellariidae		Puffinus carneipes	0.918199	0.76	True
Aves	Procellariiformes		Procellariidae		Puffinus creatopus	0.918199	0.76	True
Aves	Procellariiformes		Procellariidae		Puffinus gavia	0.918199	0.76	True
Aves	Procellariiformes		Procellariidae		Puffinus gravis	0.918199	0.76	True
Aves	Procellariiformes		Procellariidae		Puffinus griseus	0.918199	0.76	True
Aves	Procellariiformes		Procellariidae		Puffinus huttoni	0.918199	0.76	True
Aves	Procellariiformes		Procellariidae		Puffinus lherminieri	0.918199	0.76	True
Aves	Procellariiformes		Procellariidae		Puffinus mauretanicus	0.918199	0.76	True
Aves	Procellariiformes		Procellariidae		Puffinus nativitatis	0.918199	0.76	True
Aves	Procellariiformes		Procellariidae		Puffinus newelli	0.918199	0.76	True
Aves	Procellariiformes		Procellariidae		Puffinus opisthomelas	0.918199	0.76	True
Aves	Procellariiformes		Procellariidae		Puffinus pacificus	0.918199	0.76	True
Aves	Procellariiformes		Procellariidae		Puffinus puffinus	0.918199	0.76	True
Aves	Procellariiformes		Procellariidae		Puffinus tenuirostris	0.918199	0.76	True
Aves	Procellariiformes		Procellariidae		Puffinus yelkouan	0.918199	0.76	True
Aves	Procellariiformes		Procellariidae		Thalassoica antarctica	0.918199	0.76	True
Aves	Passeriformes		Fringillidae		Acanthis flammea	0.91617	0.76	True
Aves	Passeriformes		Fringillidae		Acanthis hornemanni	0.91617	0.76	True
Aves	Passeriformes		Emberizidae		Buarremon torquatus	0.91617	0.76	True
Aves	Passeriformes		Emberizidae		Buarremon virenticeps	0.91617	0.76	True
Aves	Passeriformes		Fringillidae		Bucanetes githagineus	0.91617	0.76	True
Aves	Passeriformes		Calcariidae		Calcarius lapponicus	0.91617	0.76	True
Aves	Passeriformes		Calcariidae		Calcarius mccownii	0.91617	0.76	True
Aves	Passeriformes		Calcariidae		Calcarius ornatus	0.91617	0.76	True
Aves	Passeriformes		Calcariidae		Calcarius pictus	0.91617	0.76	True
Aves	Passeriformes		Cardinalidae		Cardinalis cardinalis	0.91617	0.76	True
Aves	Passeriformes		Cardinalidae		Cardinalis phoeniceus	0.91617	0.76	True
Aves	Passeriformes		Cardinalidae		Cardinalis sinuatus	0.91617	0.76	True
Aves	Passeriformes		Fringillidae		Carduelis ambigua	0.91617	0.76	True
Aves	Passeriformes		Fringillidae		Carduelis cannabina	0.91617	0.76	True
Aves	Passeriformes		Fringillidae		Carduelis carduelis	0.91617	0.76	True
Aves	Passeriformes		Fringillidae		Carduelis chloris	0.91617	0.76	True
Aves	Passeriformes		Fringillidae		Carduelis citrinella	0.91617	0.76	True
Aves	Passeriformes		Fringillidae		Carduelis flavirostris	0.91617	0.76	True
Aves	Passeriformes		Fringillidae		Carduelis pinus	0.91617	0.76	True
Aves	Passeriformes		Fringillidae		Carduelis siemiradzkii	0.91617	0.76	True
Aves	Passeriformes		Fringillidae		Carduelis sinica	0.91617	0.76	True
Aves	Passeriformes		Fringillidae		Carduelis uropygialis	0.91617	0.76	True
Aves	Passeriformes		Fringillidae		Carduelis yarrellii	0.91617	0.76	True
Aves	Passeriformes		Fringillidae		Carpodacus erythrinus	0.91617	0.76	True
Aves	Passeriformes		Fringillidae		Carpodacus formosanus	0.91617	0.76	True
Aves	Passeriformes		Fringillidae		Carpodacus nipalensis	0.91617	0.76	True
Aves	Passeriformes		Fringillidae		Carpodacus pulcherrimus	0.91617	0.76	True
Aves	Passeriformes		Fringillidae		Carpodacus rodopeplus	0.91617	0.76	True
Aves	Passeriformes		Fringillidae		Carpodacus roseus	0.91617	0.76	True
Aves	Passeriformes		Fringillidae		Carpodacus rubicilla	0.91617	0.76	True
Aves	Passeriformes		Fringillidae		Carpodacus rubicilloides	0.91617	0.76	True
Aves	Passeriformes		Fringillidae		Carpodacus thura	0.91617	0.76	True
Aves	Passeriformes		Fringillidae		Carpodacus trifasciatus	0.91617	0.76	True
Aves	Passeriformes		Fringillidae		Carpodacus vinaceus	0.91617	0.76	True
Aves	Passeriformes		Cardinalidae		Caryothraustes canadensis	0.91617	0.76	True
Aves	Passeriformes		Cardinalidae		Caryothraustes poliogaster	0.91617	0.76	True
Aves	Passeriformes		Fringillidae		Chlorophonia flavirostris	0.91617	0.76	True
Aves	Passeriformes		Fringillidae		Chlorophonia occipitalis	0.91617	0.76	True
Aves	Passeriformes		Fringillidae		Coccothraustes coccothraustes	0.91617	0.76	True
Aves	Passeriformes		Thraupidae		Cyanerpes caeruleus	0.91617	0.76	True
Aves	Passeriformes		Thraupidae		Cyanerpes cyaneus	0.91617	0.76	True
Aves	Passeriformes		Thraupidae		Cyanerpes lucidus	0.91617	0.76	True
Aves	Passeriformes		Thraupidae		Cyanerpes nitidus	0.91617	0.76	True
Aves	Passeriformes		Cardinalidae		Cyanocompsa brissonii	0.91617	0.76	True
Aves	Passeriformes		Cardinalidae		Cyanocompsa parellina	0.91617	0.76	True
Aves	Passeriformes		Fringillidae	Emberizinae	Cyanoloxia cyanoides	0.91617	0.76	True
Aves	Passeriformes		Cardinalidae		Cyanoloxia glaucocaerulea	0.91617	0.76	True
Aves	Passeriformes		Thraupidae		Donacospiza albifrons	0.91617	0.76	True
Aves	Passeriformes		Emberizidae		Emberiza bruniceps	0.91617	0.76	True
Aves	Passeriformes		Emberizidae		Emberiza buchanani	0.91617	0.76	True
Aves	Passeriformes		Emberizidae		Emberiza cabanisi	0.91617	0.76	True
Aves	Passeriformes		Emberizidae		Emberiza caesia	0.91617	0.76	True
Aves	Passeriformes		Emberizidae		Emberiza capensis	0.91617	0.76	True
Aves	Passeriformes		Emberizidae		Emberiza chrysophrys	0.91617	0.76	True
Aves	Passeriformes		Emberizidae		Emberiza cia	0.91617	0.76	True
Aves	Passeriformes		Emberizidae		Emberiza cioides	0.91617	0.76	True
Aves	Passeriformes		Emberizidae		Emberiza cirlus	0.91617	0.76	True
Aves	Passeriformes		Emberizidae		Emberiza citrinella	0.91617	0.76	True
Aves	Passeriformes		Emberizidae		Emberiza flaviventris	0.91617	0.76	True
Aves	Passeriformes		Emberizidae		Emberiza fucata	0.91617	0.76	True
Aves	Passeriformes		Emberizidae		Emberiza godlewskii	0.91617	0.76	True
Aves	Passeriformes		Emberizidae		Emberiza hortulana	0.91617	0.76	True
Aves	Passeriformes		Emberizidae		Emberiza jankowskii	0.91617	0.76	True
Aves	Passeriformes		Emberizidae		Emberiza leucocephalos	0.91617	0.76	True
Aves	Passeriformes		Emberizidae		Emberiza melanocephala	0.91617	0.76	True
Aves	Passeriformes		Emberizidae		Emberiza pallasi	0.91617	0.76	True
Aves	Passeriformes		Emberizidae		Emberiza pusilla	0.91617	0.76	True
Aves	Passeriformes		Emberizidae		Emberiza rutila	0.91617	0.76	True
Aves	Passeriformes		Emberizidae		Emberiza schoeniclus	0.91617	0.76	True
Aves	Passeriformes		Emberizidae		Emberiza stewarti	0.91617	0.76	True
Aves	Passeriformes		Emberizidae		Emberiza striolata	0.91617	0.76	True
Aves	Passeriformes		Emberizidae		Emberiza sulphurata	0.91617	0.76	True
Aves	Passeriformes		Emberizidae		Emberiza tristrami	0.91617	0.76	True
Aves	Passeriformes		Emberizidae		Emberiza variabilis	0.91617	0.76	True
Aves	Passeriformes		Thraupidae		Embernagra platensis	0.91617	0.76	True
Aves	Passeriformes		Fringillidae		Eophona migratoria	0.91617	0.76	True
Aves	Passeriformes		Fringillidae		Eophona personata	0.91617	0.76	True
Aves	Passeriformes		Fringillidae		Eremopsaltria mongolica	0.91617	0.76	True
Aves	Passeriformes		Fringillidae		Euphonia affinis	0.91617	0.76	True
Aves	Passeriformes		Fringillidae		Euphonia chlorotica	0.91617	0.76	True
Aves	Passeriformes		Fringillidae		Euphonia cyanocephala	0.91617	0.76	True
Aves	Passeriformes		Fringillidae		Euphonia finschi	0.91617	0.76	True
Aves	Passeriformes		Fringillidae		Euphonia fulvicrissa	0.91617	0.76	True
Aves	Passeriformes		Fringillidae		Euphonia gouldi	0.91617	0.76	True
Aves	Passeriformes		Fringillidae		Euphonia hirundinacea	0.91617	0.76	True
Aves	Passeriformes		Fringillidae		Euphonia laniirostris	0.91617	0.76	True
Aves	Passeriformes		Fringillidae		Euphonia musica	0.91617	0.76	True
Aves	Passeriformes		Fringillidae		Euphonia pectoralis	0.91617	0.76	True
Aves	Passeriformes		Fringillidae		Fringilla coelebs	0.91617	0.76	True
Aves	Passeriformes		Fringillidae		Fringilla montifringilla	0.91617	0.76	True
Aves	Passeriformes		Fringillidae		Fringilla teydea	0.91617	0.76	True
Aves	Passeriformes		Emberizidae		Fringillaria impetuani	0.91617	0.76	True
Aves	Passeriformes		Emberizidae		Fringillaria tahapisi	0.91617	0.76	True
Aves	Passeriformes		Fringillidae		Haematospiza sipahi	0.91617	0.76	True
Aves	Passeriformes		Fringillidae		Haemorhous cassinii	0.91617	0.76	True
Aves	Passeriformes		Fringillidae		Haemorhous mexicanus	0.91617	0.76	True
Aves	Passeriformes		Fringillidae		Haemorhous purpureus	0.91617	0.76	True
Aves	Passeriformes		Fringillidae		Hemignathus flavus	0.91617	0.76	True
Aves	Passeriformes		Fringillidae		Hemignathus kauaiensis	0.91617	0.76	True
Aves	Passeriformes		Fringillidae		Hemignathus munroi	0.91617	0.76	True
Aves	Passeriformes		Fringillidae		Hemignathus parvus	0.91617	0.76	True
Aves	Passeriformes		Fringillidae		Hemignathus stejnegeri	0.91617	0.76	True
Aves	Passeriformes		Fringillidae		Hemignathus virens	0.91617	0.76	True
Aves	Passeriformes		Thraupidae		Hemispingus atropileus	0.91617	0.76	True
Aves	Passeriformes		Thraupidae		Hemispingus auricularis	0.91617	0.76	True
Aves	Passeriformes		Thraupidae		Hemispingus calophrys	0.91617	0.76	True
Aves	Passeriformes		Thraupidae		Hemispingus frontalis	0.91617	0.76	True
Aves	Passeriformes		Thraupidae		Hemispingus melanotis	0.91617	0.76	True
Aves	Passeriformes		Thraupidae		Hemispingus parodii	0.91617	0.76	True
Aves	Passeriformes		Thraupidae		Hemispingus piurae	0.91617	0.76	True
Aves	Passeriformes		Thraupidae		Hemispingus rufosuperciliaris	0.91617	0.76	True
Aves	Passeriformes		Thraupidae		Hemispingus superciliaris	0.91617	0.76	True
Aves	Passeriformes		Thraupidae		Hemispingus trifasciatus	0.91617	0.76	True
Aves	Passeriformes		Thraupidae		Hemispingus verticalis	0.91617	0.76	True
Aves	Passeriformes		Thraupidae		Hemispingus xanthophthalmus	0.91617	0.76	True
Aves	Passeriformes		Fringillidae		Hesperiphona vespertina	0.91617	0.76	True
Aves	Passeriformes		Fringillidae		Himatione sanguinea	0.91617	0.76	True
Aves	Passeriformes		Icteridae		Hypopyrrhus pyrohypogaster	0.91617	0.76	True
Aves	Passeriformes		Fringillidae		Leucosticte arctoa	0.91617	0.76	True
Aves	Passeriformes		Fringillidae		Leucosticte atrata	0.91617	0.76	True
Aves	Passeriformes		Fringillidae		Leucosticte australis	0.91617	0.76	True
Aves	Passeriformes		Fringillidae		Leucosticte brandti	0.91617	0.76	True
Aves	Passeriformes		Fringillidae		Leucosticte nemoricola	0.91617	0.76	True
Aves	Passeriformes		Fringillidae		Leucosticte tephrocotis	0.91617	0.76	True
Aves	Passeriformes		Fringillidae		Linurgus olivaceus	0.91617	0.76	True
Aves	Passeriformes		Fringillidae		Loxia curvirostra	0.91617	0.76	True
Aves	Passeriformes		Fringillidae		Loxia leucoptera	0.91617	0.76	True
Aves	Passeriformes		Fringillidae		Loxia pytyopsittacus	0.91617	0.76	True
Aves	Passeriformes		Fringillidae		Loxia scotica	0.91617	0.76	True
Aves	Passeriformes		Fringillidae		Loxioides bailleui	0.91617	0.76	True
Aves	Passeriformes		Fringillidae		Loxops caeruleirostris	0.91617	0.76	True
Aves	Passeriformes		Fringillidae		Loxops coccineus	0.91617	0.76	True
Aves	Passeriformes		Fringillidae		Loxops mana	0.91617	0.76	True
Aves	Passeriformes		Fringillidae		Melamprosops phaeosoma	0.91617	0.76	True
Aves	Passeriformes		Emberizidae		Melophus lathami	0.91617	0.76	True
Aves	Passeriformes		Thraupidae		Melopyrrha nigra	0.91617	0.76	True
Aves	Passeriformes		Emberizidae		Miliaria calandra	0.91617	0.76	True
Aves	Passeriformes		Fringillidae		Mycerobas affinis	0.91617	0.76	True
Aves	Passeriformes		Fringillidae		Mycerobas carnipes	0.91617	0.76	True
Aves	Passeriformes		Fringillidae		Oreomystis bairdi	0.91617	0.76	True
Aves	Passeriformes		Thraupidae		Orthogonys chloricterus	0.91617	0.76	True
Aves	Passeriformes		Fringillidae		Palmeria dolei	0.91617	0.76	True
Aves	Passeriformes		Cardinalidae		Parkerthraustes humeralis	0.91617	0.76	True
Aves	Passeriformes		Fringillidae		Paroreomyza montana	0.91617	0.76	True
Aves	Passeriformes		Cardinalidae		Passerina amoena	0.91617	0.76	True
Aves	Passeriformes		Cardinalidae		Passerina caerulea	0.91617	0.76	True
Aves	Passeriformes		Cardinalidae		Passerina ciris	0.91617	0.76	True
Aves	Passeriformes		Cardinalidae		Passerina cyanea	0.91617	0.76	True
Aves	Passeriformes		Cardinalidae		Passerina leclancherii	0.91617	0.76	True
Aves	Passeriformes		Cardinalidae		Passerina rositae	0.91617	0.76	True
Aves	Passeriformes		Cardinalidae		Passerina versicolor	0.91617	0.76	True
Aves	Passeriformes		Cardinalidae		Periporphyrus erythromelas	0.91617	0.76	True
Aves	Passeriformes		Emberizidae		Peucaea aestivalis	0.91617	0.76	True
Aves	Passeriformes		Emberizidae		Peucaea botterii	0.91617	0.76	True
Aves	Passeriformes		Peucedramidae		Peucedramus taeniatus	0.91617	0.76	True
Aves	Passeriformes		Parulidae		Phaeothlypis fulvicauda	0.91617	0.76	True
Aves	Passeriformes		Cardinalidae		Pheucticus aureoventris	0.91617	0.76	True
Aves	Passeriformes		Cardinalidae		Pheucticus ludovicianus	0.91617	0.76	True
Aves	Passeriformes		Cardinalidae		Pheucticus melanocephalus	0.91617	0.76	True
Aves	Passeriformes		Fringillidae		Pinicola enucleator	0.91617	0.76	True
Aves	Passeriformes		Thraupidae		Platyspiza crassirostris	0.91617	0.76	True
Aves	Passeriformes		Calcariidae		Plectrophenax hyperboreus	0.91617	0.76	True
Aves	Passeriformes		Calcariidae		Plectrophenax nivalis	0.91617	0.76	True
Aves	Passeriformes		Emberizidae		Porphyrospiza caerulescens	0.91617	0.76	True
Aves	Passeriformes		Fringillidae		Pseudonestor xanthophrys	0.91617	0.76	True
Aves	Passeriformes		Fringillidae		Pyrrhoplectes epauletta	0.91617	0.76	True
Aves	Passeriformes		Fringillidae		Pyrrhula aurantiaca	0.91617	0.76	True
Aves	Passeriformes		Fringillidae		Pyrrhula erythaca	0.91617	0.76	True
Aves	Passeriformes		Fringillidae		Pyrrhula erythrocephala	0.91617	0.76	True
Aves	Passeriformes		Fringillidae		Pyrrhula murina	0.91617	0.76	True
Aves	Passeriformes		Fringillidae		Pyrrhula nipalensis	0.91617	0.76	True
Aves	Passeriformes		Fringillidae		Pyrrhula pyrrhula	0.91617	0.76	True
Aves	Passeriformes		Icteridae		Quiscalus lugubris	0.91617	0.76	True
Aves	Passeriformes		Icteridae		Quiscalus major	0.91617	0.76	True
Aves	Passeriformes		Icteridae		Quiscalus mexicanus	0.91617	0.76	True
Aves	Passeriformes		Icteridae		Quiscalus nicaraguensis	0.91617	0.76	True
Aves	Passeriformes		Icteridae		Quiscalus niger	0.91617	0.76	True
Aves	Passeriformes		Icteridae		Quiscalus quiscula	0.91617	0.76	True
Aves	Passeriformes		Fringillidae		Rhodospiza obsoleta	0.91617	0.76	True
Aves	Passeriformes		Cardinalidae		Rhodothraupis celaeno	0.91617	0.76	True
Aves	Passeriformes		Thraupidae		Rowettia goughensis	0.91617	0.76	True
Aves	Passeriformes		Emberizidae		Schoeniclus aureolus	0.91617	0.76	True
Aves	Passeriformes		Fringillidae	Emberizinae	Schoeniclus elegans	0.91617	0.76	True
Aves	Passeriformes		Fringillidae	Emberizinae	Schoeniclus rusticus	0.91617	0.76	True
Aves	Passeriformes		Fringillidae	Emberizinae	Schoeniclus siemsseni	0.91617	0.76	True
Aves	Passeriformes		Fringillidae	Emberizinae	Schoeniclus yessoensis	0.91617	0.76	True
Aves	Passeriformes		Fringillidae		Serinus alario	0.91617	0.76	True
Aves	Passeriformes		Fringillidae		Serinus albogularis	0.91617	0.76	True
Aves	Passeriformes		Fringillidae		Serinus atrogularis	0.91617	0.76	True
Aves	Passeriformes		Fringillidae		Serinus burtoni	0.91617	0.76	True
Aves	Passeriformes		Fringillidae		Serinus canaria	0.91617	0.76	True
Aves	Passeriformes		Fringillidae		Serinus canicollis	0.91617	0.76	True
Aves	Passeriformes		Fringillidae		Serinus capistratus	0.91617	0.76	True
Aves	Passeriformes		Fringillidae		Serinus citrinella	0.91617	0.76	True
Aves	Passeriformes		Fringillidae		Serinus citrinelloides	0.91617	0.76	True
Aves	Passeriformes		Fringillidae		Serinus citrinipectus	0.91617	0.76	True
Aves	Passeriformes		Fringillidae		Serinus dorsostriatus	0.91617	0.76	True
Aves	Passeriformes		Fringillidae		Serinus flaviventris	0.91617	0.76	True
Aves	Passeriformes		Fringillidae		Serinus flavivertex	0.91617	0.76	True
Aves	Passeriformes		Fringillidae		Serinus gularis	0.91617	0.76	True
Aves	Passeriformes		Fringillidae		Serinus hypostictus	0.91617	0.76	True
Aves	Passeriformes		Fringillidae		Serinus leucopygius	0.91617	0.76	True
Aves	Passeriformes		Fringillidae		Serinus mozambicus	0.91617	0.76	True
Aves	Passeriformes		Fringillidae		Serinus pusillus	0.91617	0.76	True
Aves	Passeriformes		Fringillidae		Serinus reichardi	0.91617	0.76	True
Aves	Passeriformes		Fringillidae		Serinus scotops	0.91617	0.76	True
Aves	Passeriformes		Fringillidae		Serinus serinus	0.91617	0.76	True
Aves	Passeriformes		Fringillidae		Serinus striolatus	0.91617	0.76	True
Aves	Passeriformes		Fringillidae		Serinus sulphuratus	0.91617	0.76	True
Aves	Passeriformes		Fringillidae		Serinus syriacus	0.91617	0.76	True
Aves	Passeriformes		Fringillidae		Serinus thibetanus	0.91617	0.76	True
Aves	Passeriformes		Fringillidae		Serinus totta	0.91617	0.76	True
Aves	Passeriformes		Fringillidae		Serinus whytii	0.91617	0.76	True
Aves	Passeriformes		Fringillidae		Spinus atratus	0.91617	0.76	True
Aves	Passeriformes		Fringillidae		Spinus barbatus	0.91617	0.76	True
Aves	Passeriformes		Fringillidae		Spinus crassirostris	0.91617	0.76	True
Aves	Passeriformes		Fringillidae		Spinus cucullatus	0.91617	0.76	True
Aves	Passeriformes		Fringillidae		Spinus lawrencei	0.91617	0.76	True
Aves	Passeriformes		Fringillidae		Spinus magellanicus	0.91617	0.76	True
Aves	Passeriformes		Fringillidae		Spinus notatus	0.91617	0.76	True
Aves	Passeriformes		Fringillidae		Spinus olivaceus	0.91617	0.76	True
Aves	Passeriformes		Fringillidae		Spinus psaltria	0.91617	0.76	True
Aves	Passeriformes		Fringillidae		Spinus tristis	0.91617	0.76	True
Aves	Passeriformes		Fringillidae		Spinus xanthogastrus	0.91617	0.76	True
Aves	Passeriformes		Cardinalidae		Spiza americana	0.91617	0.76	True
Aves	Passeriformes		Fringillidae		Telespiza cantans	0.91617	0.76	True
Aves	Passeriformes		Fringillidae		Telespiza ultima	0.91617	0.76	True
Aves	Passeriformes		Thraupidae		Tersina viridis	0.91617	0.76	True
Aves	Passeriformes		Fringillidae		Uragus sibiricus	0.91617	0.76	True
Aves	Passeriformes		Fringillidae		Vestiaria coccinea	0.91617	0.76	True
Aves	Procellariiformes		Diomedeidae		Diomedea amsterdamensis	0.915722	0.76	True
Aves	Procellariiformes		Diomedeidae		Diomedea antipodensis	0.915722	0.76	True
Aves	Procellariiformes		Diomedeidae		Diomedea chrysostoma	0.915722	0.76	True
Aves	Procellariiformes		Diomedeidae		Diomedea dabbenena	0.915722	0.76	True
Aves	Procellariiformes		Diomedeidae		Diomedea epomophora	0.915722	0.76	True
Aves	Procellariiformes		Diomedeidae		Diomedea exulans	0.915722	0.76	True
Aves	Procellariiformes		Hydrobatidae	Oceanitinae	Fregetta grallaria	0.915722	0.76	True
Aves	Procellariiformes		Hydrobatidae	Oceanitinae	Fregetta tropica	0.915722	0.76	True
Aves	Procellariiformes		Hydrobatidae	Oceanitinae	Garrodia nereis	0.915722	0.76	True
Aves	Procellariiformes			Hydrobatidae	Hydrobates castro	0.915722	0.76	True
Aves	Procellariiformes			Hydrobatidae	Hydrobates homochroa	0.915722	0.76	True
Aves	Procellariiformes		Hydrobatidae	Hydrobatinae	Hydrobates pelagicus	0.915722	0.76	True
Aves	Procellariiformes		Hydrobatidae	Oceanitinae	Oceanites oceanicus	0.915722	0.76	True
Aves	Procellariiformes		Hydrobatidae	Hydrobatinae	Oceanodroma furcata	0.915722	0.76	True
Aves	Procellariiformes		Hydrobatidae	Hydrobatinae	Oceanodroma leucorhoa	0.915722	0.76	True
Aves	Procellariiformes		Hydrobatidae	Hydrobatinae	Oceanodroma melania	0.915722	0.76	True
Aves	Procellariiformes		Hydrobatidae	Hydrobatinae	Oceanodroma microsoma	0.915722	0.76	True
Aves	Procellariiformes		Hydrobatidae	Hydrobatinae	Oceanodroma tethys	0.915722	0.76	True
Aves	Procellariiformes		Hydrobatidae	Hydrobatinae	Oceanodroma tristrami	0.915722	0.76	True
Aves	Procellariiformes		Hydrobatidae	Oceanitinae	Pelagodroma marina	0.915722	0.76	True
Aves	Procellariiformes		Diomedeidae		Phoebastria albatrus	0.915722	0.76	True
Aves	Procellariiformes		Diomedeidae		Phoebastria immutabilis	0.915722	0.76	True
Aves	Procellariiformes		Diomedeidae		Phoebastria irrorata	0.915722	0.76	True
Aves	Procellariiformes		Diomedeidae		Phoebastria nigripes	0.915722	0.76	True
Aves	Procellariiformes		Diomedeidae		Phoebetria fusca	0.915722	0.76	True
Aves	Procellariiformes		Diomedeidae		Phoebetria palpebrata	0.915722	0.76	True
Aves	Procellariiformes		Diomedeidae		Thalassarche bulleri	0.915722	0.76	True
Aves	Procellariiformes		Diomedeidae		Thalassarche carteri	0.915722	0.76	True
Aves	Procellariiformes		Diomedeidae		Thalassarche cauta	0.915722	0.76	True
Aves	Procellariiformes		Diomedeidae		Thalassarche chlororhynchos	0.915722	0.76	True
Aves	Procellariiformes		Diomedeidae		Thalassarche eremita	0.915722	0.76	True
Aves	Procellariiformes		Diomedeidae		Thalassarche impavida	0.915722	0.76	True
Aves	Procellariiformes		Diomedeidae		Thalassarche melanophrys	0.915722	0.76	True
Aves	Procellariiformes		Diomedeidae		Thalassarche salvini	0.915722	0.76	True
Aves	Procellariiformes		Diomedeidae		Thalassarche steadi	0.915722	0.76	True
Aves	Podicipediformes		Podicipedidae		Aechmophorus clarkii	0.912022	0.76	True
Aves	Podicipediformes		Podicipedidae		Aechmophorus occidentalis	0.912022	0.76	True
Aves	Cuculiformes		Cuculidae	Cuculinae	Cacomantis flabelliformis	0.912022	0.76	True
Aves	Cuculiformes		Cuculidae	Cuculinae	Cacomantis merulinus	0.912022	0.76	True
Aves	Cuculiformes		Cuculidae	Cuculinae	Cacomantis variolosus	0.912022	0.76	True
Aves	Cuculiformes		Cuculidae	Phaenicophaeinae	Carpococcyx renauldi	0.912022	0.76	True
Aves	Cuculiformes		Cuculidae	Centropodinae	Centropus cupreicaudus	0.912022	0.76	True
Aves	Cuculiformes		Cuculidae	Centropodinae	Centropus grillii	0.912022	0.76	True
Aves	Cuculiformes		Cuculidae	Centropodinae	Centropus monachus	0.912022	0.76	True
Aves	Cuculiformes		Cuculidae	Centropodinae	Centropus phasianinus	0.912022	0.76	True
Aves	Cuculiformes		Cuculidae	Centropodinae	Centropus senegalensis	0.912022	0.76	True
Aves	Cuculiformes		Cuculidae	Centropodinae	Centropus sinensis	0.912022	0.76	True
Aves	Cuculiformes		Cuculidae	Centropodinae	Centropus superciliosus	0.912022	0.76	True
Aves	Cuculiformes		Cuculidae	Centropodinae	Centropus unirufus	0.912022	0.76	True
Aves	Cuculiformes		Cuculidae	Centropodinae	Centropus viridis	0.912022	0.76	True
Aves	Cuculiformes		Cuculidae	Cuculinae	Cercococcyx montanus	0.912022	0.76	True
Aves	Cuculiformes		Cuculidae		Chalcites basalis	0.912022	0.76	True
Aves	Cuculiformes		Cuculidae		Chalcites lucidus	0.912022	0.76	True
Aves	Cuculiformes		Cuculidae		Chalcites minutillus	0.912022	0.76	True
Aves	Cuculiformes		Cuculidae	Cuculinae	Chrysococcyx flavigularis	0.912022	0.76	True
Aves	Cuculiformes		Cuculidae	Cuculinae	Chrysococcyx klaas	0.912022	0.76	True
Aves	Cuculiformes		Cuculidae	Cuculinae	Chrysococcyx osculans	0.912022	0.76	True
Aves	Cuculiformes		Cuculidae	Cuculinae	Clamator glandarius	0.912022	0.76	True
Aves	Cuculiformes		Cuculidae	Cuculinae	Clamator jacobinus	0.912022	0.76	True
Aves	Cuculiformes		Cuculidae		Coccycua minuta	0.912022	0.76	True
Aves	Cuculiformes		Cuculidae	Phaenicophaeinae	Coccyzus americanus	0.912022	0.76	True
Aves	Cuculiformes		Cuculidae	Phaenicophaeinae	Coccyzus erythropthalmus	0.912022	0.76	True
Aves	Cuculiformes		Cuculidae	Phaenicophaeinae	Coccyzus melacoryphus	0.912022	0.76	True
Aves	Cuculiformes		Cuculidae	Phaenicophaeinae	Coccyzus minor	0.912022	0.76	True
Aves	Musophagiformes		Musophagidae	Corythaeolinae	Corythaeola cristata	0.912022	0.76	True
Aves	Musophagiformes		Musophagidae	Criniferinae	Corythaixoides concolor	0.912022	0.76	True
Aves	Musophagiformes		Musophagidae	Criniferinae	Corythaixoides personatus	0.912022	0.76	True
Aves	Cuculiformes		Cuculidae	Phaenicophaeinae	Coua caerulea	0.912022	0.76	True
Aves	Cuculiformes		Cuculidae	Phaenicophaeinae	Coua cristata	0.912022	0.76	True
Aves	Cuculiformes		Cuculidae	Phaenicophaeinae	Coua cursor	0.912022	0.76	True
Aves	Cuculiformes		Cuculidae	Phaenicophaeinae	Coua reynaudii	0.912022	0.76	True
Aves	Cuculiformes		Cuculidae	Phaenicophaeinae	Coua ruficeps	0.912022	0.76	True
Aves	Cuculiformes		Cuculidae	Phaenicophaeinae	Coua serriana	0.912022	0.76	True
Aves	Musophagiformes		Musophagidae	Criniferinae	Crinifer piscator	0.912022	0.76	True
Aves	Musophagiformes		Musophagidae	Criniferinae	Crinifer zonurus	0.912022	0.76	True
Aves	Musophagiformes		Musophagidae	Criniferinae	Criniferoides leucogaster	0.912022	0.76	True
Aves	Cuculiformes		Cuculidae	Crotophaginae	Crotophaga ani	0.912022	0.76	True
Aves	Cuculiformes		Cuculidae	Crotophaginae	Crotophaga major	0.912022	0.76	True
Aves	Cuculiformes		Cuculidae	Crotophaginae	Crotophaga sulcirostris	0.912022	0.76	True
Aves	Cuculiformes		Cuculidae	Cuculinae	Cuculus canorus	0.912022	0.76	True
Aves	Cuculiformes		Cuculidae	Cuculinae	Cuculus fugax	0.912022	0.76	True
Aves	Cuculiformes		Cuculidae	Cuculinae	Cuculus pallidus	0.912022	0.76	True
Aves	Cuculiformes		Cuculidae	Cuculinae	Cuculus poliocephalus	0.912022	0.76	True
Aves	Cuculiformes		Cuculidae	Cuculinae	Cuculus saturatus	0.912022	0.76	True
Aves	Cuculiformes		Cuculidae	Cuculinae	Cuculus vagans	0.912022	0.76	True
Aves	Cuculiformes		Cuculidae	Phaenicophaeinae	Dasylophus superciliosus	0.912022	0.76	True
Aves	Cuculiformes		Cuculidae	Neomorphinae	Dromococcyx phasianellus	0.912022	0.76	True
Aves	Columbiformes		Columbidae	Columbinae	Ectopistes migratorius	0.912022	0.76	True
Aves	Cuculiformes		Cuculidae	Cuculinae	Eudynamys scolopaceus	0.912022	0.76	True
Aves	Cuculiformes		Cuculidae	Cuculinae	Eudynamys taitensis	0.912022	0.76	True
Aves	Musophagiformes		Musophagidae		Gallirex johnstoni	0.912022	0.76	True
Aves	Musophagiformes		Musophagidae		Gallirex porphyreolophus	0.912022	0.76	True
Aves	Cuculiformes		Cuculidae	Neomorphinae	Geococcyx californianus	0.912022	0.76	True
Aves	Cuculiformes		Cuculidae	Neomorphinae	Geococcyx velox	0.912022	0.76	True
Aves	Cuculiformes		Cuculidae	Crotophaginae	Guira guira	0.912022	0.76	True
Aves	Musophagiformes		Musophagidae	Musophaginae	Musophaga rossae	0.912022	0.76	True
Aves	Musophagiformes		Musophagidae	Musophaginae	Musophaga violacea	0.912022	0.76	True
Aves	Cuculiformes		Cuculidae	Neomorphinae	Neomorphus geoffroyi	0.912022	0.76	True
Aves	Cuculiformes		Cuculidae	Neomorphinae	Neomorphus rufipennis	0.912022	0.76	True
Aves	Opisthocomiformes		Opisthocomidae		Opisthocomus hoazin	0.912022	0.76	True
Aves	Columbiformes		Columbidae	Gourinae	Pezophaps solitaria	0.912022	0.76	True
Aves	Cuculiformes		Cuculidae	Phaenicophaeinae	Phaenicophaeus curvirostris	0.912022	0.76	True
Aves	Phoenicopteriformes		Phoenicopteridae		Phoenicoparrus andinus	0.912022	0.76	True
Aves	Phoenicopteriformes		Phoenicopteridae		Phoenicoparrus jamesi	0.912022	0.76	True
Aves	Phoenicopteriformes		Phoenicopteridae		Phoenicoparrus minor	0.912022	0.76	True
Aves	Phoenicopteriformes		Phoenicopteridae		Phoenicopterus chilensis	0.912022	0.76	True
Aves	Phoenicopteriformes		Phoenicopteridae		Phoenicopterus roseus	0.912022	0.76	True
Aves	Phoenicopteriformes		Phoenicopteridae		Phoenicopterus ruber	0.912022	0.76	True
Aves	Cuculiformes		Cuculidae	Phaenicophaeinae	Piaya cayana	0.912022	0.76	True
Aves	Cuculiformes		Cuculidae	Phaenicophaeinae	Piaya melanogaster	0.912022	0.76	True
Aves	Podicipediformes		Podicipedidae		Podiceps auritus	0.912022	0.76	True
Aves	Podicipediformes		Podicipedidae		Podiceps cristatus	0.912022	0.76	True
Aves	Podicipediformes		Podicipedidae		Podiceps gallardoi	0.912022	0.76	True
Aves	Podicipediformes		Podicipedidae		Podiceps grisegena	0.912022	0.76	True
Aves	Podicipediformes		Podicipedidae		Podiceps major	0.912022	0.76	True
Aves	Podicipediformes		Podicipedidae		Podiceps nigricollis	0.912022	0.76	True
Aves	Podicipediformes		Podicipedidae		Podilymbus podiceps	0.912022	0.76	True
Aves	Columbiformes		Columbidae	Gourinae	Raphus cucullatus	0.912022	0.76	True
Aves	Podicipediformes		Podicipedidae		Rollandia rolland	0.912022	0.76	True
Aves	Cuculiformes		Cuculidae	Cuculinae	Scythrops novaehollandiae	0.912022	0.76	True
Aves	Cuculiformes		Cuculidae	Cuculinae	Surniculus lugubris	0.912022	0.76	True
Aves	Podicipediformes		Podicipedidae		Tachybaptus dominicus	0.912022	0.76	True
Aves	Podicipediformes		Podicipedidae		Tachybaptus novaehollandiae	0.912022	0.76	True
Aves	Podicipediformes		Podicipedidae		Tachybaptus ruficollis	0.912022	0.76	True
Aves	Cuculiformes		Cuculidae	Neomorphinae	Tapera naevia	0.912022	0.76	True
Aves	Musophagiformes		Musophagidae	Musophaginae	Tauraco bannermani	0.912022	0.76	True
Aves	Musophagiformes		Musophagidae	Musophaginae	Tauraco corythaix	0.912022	0.76	True
Aves	Musophagiformes		Musophagidae	Musophaginae	Tauraco erythrolophus	0.912022	0.76	True
Aves	Musophagiformes		Musophagidae	Musophaginae	Tauraco fischeri	0.912022	0.76	True
Aves	Musophagiformes		Musophagidae	Musophaginae	Tauraco hartlaubi	0.912022	0.76	True
Aves	Musophagiformes		Musophagidae	Musophaginae	Tauraco leucolophus	0.912022	0.76	True
Aves	Musophagiformes		Musophagidae	Musophaginae	Tauraco leucotis	0.912022	0.76	True
Aves	Musophagiformes		Musophagidae	Musophaginae	Tauraco livingstonii	0.912022	0.76	True
Aves	Musophagiformes		Musophagidae	Musophaginae	Tauraco macrorhynchus	0.912022	0.76	True
Aves	Musophagiformes		Musophagidae	Musophaginae	Tauraco persa	0.912022	0.76	True
Aves	Musophagiformes		Musophagidae	Musophaginae	Tauraco schalowi	0.912022	0.76	True
Aves	Musophagiformes		Musophagidae	Musophaginae	Tauraco schuettii	0.912022	0.76	True
Aves	Passeriformes		Turdidae		Alethe choloensis	0.908251	0.76	True
Aves	Passeriformes		Turdidae		Alethe diademata	0.908251	0.76	True
Aves	Passeriformes		Turdidae		Alethe poliocephala	0.908251	0.76	True
Aves	Passeriformes		Turdidae		Alethe poliophrys	0.908251	0.76	True
Aves	Passeriformes		Muscicapidae		Brachypteryx albiventris	0.908251	0.76	True
Aves	Passeriformes		Muscicapidae		Brachypteryx leucophrys	0.908251	0.76	True
Aves	Passeriformes		Muscicapidae		Brachypteryx montana	0.908251	0.76	True
Aves	Passeriformes		Muscicapidae		Bradornis infuscatus	0.908251	0.76	True
Aves	Passeriformes		Muscicapidae		Bradornis mariquensis	0.908251	0.76	True
Aves	Passeriformes		Muscicapidae		Bradornis microrhynchus	0.908251	0.76	True
Aves	Passeriformes		Muscicapidae		Calliope calliope	0.908251	0.76	True
Aves	Passeriformes		Muscicapidae		Calliope pectoralis	0.908251	0.76	True
Aves	Passeriformes		Muscicapidae		Campicoloides bifasciatus	0.908251	0.76	True
Aves	Passeriformes		Turdidae		Catharus aurantiirostris	0.908251	0.76	True
Aves	Passeriformes		Turdidae		Catharus bicknelli	0.908251	0.76	True
Aves	Passeriformes		Turdidae		Catharus dryas	0.908251	0.76	True
Aves	Passeriformes		Turdidae		Catharus frantzii	0.908251	0.76	True
Aves	Passeriformes		Turdidae		Catharus fuscater	0.908251	0.76	True
Aves	Passeriformes		Turdidae		Catharus fuscescens	0.908251	0.76	True
Aves	Passeriformes		Turdidae		Catharus gracilirostris	0.908251	0.76	True
Aves	Passeriformes		Turdidae		Catharus guttatus	0.908251	0.76	True
Aves	Passeriformes		Turdidae		Catharus mexicanus	0.908251	0.76	True
Aves	Passeriformes		Turdidae		Catharus minimus	0.908251	0.76	True
Aves	Passeriformes		Turdidae		Catharus occidentalis	0.908251	0.76	True
Aves	Passeriformes		Turdidae		Catharus ustulatus	0.908251	0.76	True
Aves	Passeriformes		Muscicapidae		Cercomela dubia	0.908251	0.76	True
Aves	Passeriformes		Muscicapidae		Cercomela familiaris	0.908251	0.76	True
Aves	Passeriformes		Muscicapidae		Cercomela fusca	0.908251	0.76	True
Aves	Passeriformes		Muscicapidae		Cercomela melanura	0.908251	0.76	True
Aves	Passeriformes		Muscicapidae		Cercomela schlegelii	0.908251	0.76	True
Aves	Passeriformes		Muscicapidae		Cercomela scotocerca	0.908251	0.76	True
Aves	Passeriformes		Muscicapidae		Cercomela sinuata	0.908251	0.76	True
Aves	Passeriformes		Muscicapidae		Cercomela sordida	0.908251	0.76	True
Aves	Passeriformes		Muscicapidae		Cercomela tractrac	0.908251	0.76	True
Aves	Passeriformes		Muscicapidae		Cercotrichas barbata	0.908251	0.76	True
Aves	Passeriformes		Muscicapidae		Cercotrichas coryphoeus	0.908251	0.76	True
Aves	Passeriformes		Muscicapidae		Cercotrichas galactotes	0.908251	0.76	True
Aves	Passeriformes		Muscicapidae		Cercotrichas hartlaubi	0.908251	0.76	True
Aves	Passeriformes		Muscicapidae		Cercotrichas leucophrys	0.908251	0.76	True
Aves	Passeriformes		Muscicapidae		Cercotrichas leucosticta	0.908251	0.76	True
Aves	Passeriformes		Muscicapidae		Cercotrichas paena	0.908251	0.76	True
Aves	Passeriformes		Muscicapidae		Cercotrichas podobe	0.908251	0.76	True
Aves	Passeriformes		Muscicapidae		Cercotrichas quadrivirgata	0.908251	0.76	True
Aves	Passeriformes		Muscicapidae		Chaimarrornis leucocephalus	0.908251	0.76	True
Aves	Passeriformes		Muscicapidae		Chamaetylas fuelleborni	0.908251	0.76	True
Aves	Passeriformes		Muscicapidae		Cichladusa guttata	0.908251	0.76	True
Aves	Passeriformes		Turdidae		Cichlherminia lherminieri	0.908251	0.76	True
Aves	Passeriformes		Turdidae		Cichlopsis leucogenys	0.908251	0.76	True
Aves	Passeriformes		Muscicapidae		Cinclidium frontale	0.908251	0.76	True
Aves	Passeriformes		Cinclidae		Cinclus cinclus	0.908251	0.76	True
Aves	Passeriformes		Cinclidae		Cinclus mexicanus	0.908251	0.76	True
Aves	Passeriformes		Cinclidae		Cinclus pallasii	0.908251	0.76	True
Aves	Passeriformes		Turdidae		Cochoa viridis	0.908251	0.76	True
Aves	Passeriformes		Muscicapidae		Copsychus albospecularis	0.908251	0.76	True
Aves	Passeriformes		Muscicapidae		Copsychus cebuensis	0.908251	0.76	True
Aves	Passeriformes		Muscicapidae		Copsychus luzoniensis	0.908251	0.76	True
Aves	Passeriformes		Muscicapidae		Copsychus malabaricus	0.908251	0.76	True
Aves	Passeriformes		Muscicapidae		Copsychus niger	0.908251	0.76	True
Aves	Passeriformes		Muscicapidae		Copsychus saularis	0.908251	0.76	True
Aves	Passeriformes		Muscicapidae		Copsychus sechellarum	0.908251	0.76	True
Aves	Passeriformes		Muscicapidae		Copsychus stricklandii	0.908251	0.76	True
Aves	Passeriformes		Muscicapidae		Cossypha albicapillus	0.908251	0.76	True
Aves	Passeriformes		Muscicapidae		Cossypha anomala	0.908251	0.76	True
Aves	Passeriformes		Muscicapidae		Cossypha archeri	0.908251	0.76	True
Aves	Passeriformes		Muscicapidae		Cossypha caffra	0.908251	0.76	True
Aves	Passeriformes		Muscicapidae		Cossypha cyanocampter	0.908251	0.76	True
Aves	Passeriformes		Muscicapidae		Cossypha dichroa	0.908251	0.76	True
Aves	Passeriformes		Muscicapidae		Cossypha heuglini	0.908251	0.76	True
Aves	Passeriformes		Muscicapidae		Cossypha humeralis	0.908251	0.76	True
Aves	Passeriformes		Muscicapidae		Cossypha isabellae	0.908251	0.76	True
Aves	Passeriformes		Muscicapidae		Cossypha niveicapilla	0.908251	0.76	True
Aves	Passeriformes		Muscicapidae		Cossypha polioptera	0.908251	0.76	True
Aves	Passeriformes		Muscicapidae		Cossypha semirufa	0.908251	0.76	True
Aves	Passeriformes		Muscicapidae		Cossyphicula roberti	0.908251	0.76	True
Aves	Passeriformes		Muscicapidae		Cyanoptila cyanomelana	0.908251	0.76	True
Aves	Passeriformes		Muscicapidae		Cyornis banyumas	0.908251	0.76	True
Aves	Passeriformes		Muscicapidae		Cyornis concretus	0.908251	0.76	True
Aves	Passeriformes		Muscicapidae		Cyornis hainanus	0.908251	0.76	True
Aves	Passeriformes		Muscicapidae		Cyornis poliogenys	0.908251	0.76	True
Aves	Passeriformes		Muscicapidae		Cyornis rubeculoides	0.908251	0.76	True
Aves	Passeriformes		Muscicapidae		Cyornis rufigastra	0.908251	0.76	True
Aves	Passeriformes		Muscicapidae		Cyornis unicolor	0.908251	0.76	True
Aves	Passeriformes		Muscicapidae		Empidornis semipartitus	0.908251	0.76	True
Aves	Passeriformes		Muscicapidae		Enicurus leschenaulti	0.908251	0.76	True
Aves	Passeriformes		Muscicapidae		Enicurus maculatus	0.908251	0.76	True
Aves	Passeriformes		Muscicapidae		Enicurus ruficapillus	0.908251	0.76	True
Aves	Passeriformes		Muscicapidae		Enicurus schistaceus	0.908251	0.76	True
Aves	Passeriformes		Muscicapidae		Enicurus scouleri	0.908251	0.76	True
Aves	Passeriformes		Turdidae		Entomodestes coracinus	0.908251	0.76	True
Aves	Passeriformes		Turdidae		Entomodestes leucotis	0.908251	0.76	True
Aves	Passeriformes		Muscicapidae		Erithacus akahige	0.908251	0.76	True
Aves	Passeriformes		Muscicapidae		Erithacus komadori	0.908251	0.76	True
Aves	Passeriformes		Muscicapidae		Erithacus rubecula	0.908251	0.76	True
Aves	Passeriformes		Muscicapidae		Eumyias indigo	0.908251	0.76	True
Aves	Passeriformes		Muscicapidae		Eumyias panayensis	0.908251	0.76	True
Aves	Passeriformes		Muscicapidae		Eumyias thalassinus	0.908251	0.76	True
Aves	Passeriformes		Muscicapidae		Ficedula albicilla	0.908251	0.76	True
Aves	Passeriformes		Muscicapidae		Ficedula albicollis	0.908251	0.76	True
Aves	Passeriformes		Muscicapidae		Ficedula bonthaina	0.908251	0.76	True
Aves	Passeriformes		Muscicapidae		Ficedula buruensis	0.908251	0.76	True
Aves	Passeriformes		Muscicapidae		Ficedula crypta	0.908251	0.76	True
Aves	Passeriformes		Muscicapidae		Ficedula disposita	0.908251	0.76	True
Aves	Passeriformes		Muscicapidae		Ficedula dumetoria	0.908251	0.76	True
Aves	Passeriformes		Muscicapidae		Ficedula harterti	0.908251	0.76	True
Aves	Passeriformes		Muscicapidae		Ficedula hodgsonii	0.908251	0.76	True
Aves	Passeriformes		Muscicapidae		Ficedula hyperythra	0.908251	0.76	True
Aves	Passeriformes		Muscicapidae		Ficedula hypoleuca	0.908251	0.76	True
Aves	Passeriformes		Muscicapidae		Ficedula monileger	0.908251	0.76	True
Aves	Passeriformes		Muscicapidae		Ficedula mugimaki	0.908251	0.76	True
Aves	Passeriformes		Muscicapidae		Ficedula narcissina	0.908251	0.76	True
Aves	Passeriformes		Muscicapidae		Ficedula nigrorufa	0.908251	0.76	True
Aves	Passeriformes		Muscicapidae		Ficedula parva	0.908251	0.76	True
Aves	Passeriformes		Muscicapidae		Ficedula platenae	0.908251	0.76	True
Aves	Passeriformes		Muscicapidae		Ficedula rufigula	0.908251	0.76	True
Aves	Passeriformes		Muscicapidae		Ficedula sapphira	0.908251	0.76	True
Aves	Passeriformes		Muscicapidae		Ficedula semitorquata	0.908251	0.76	True
Aves	Passeriformes		Muscicapidae		Ficedula strophiata	0.908251	0.76	True
Aves	Passeriformes		Muscicapidae		Ficedula subrubra	0.908251	0.76	True
Aves	Passeriformes		Muscicapidae		Ficedula superciliaris	0.908251	0.76	True
Aves	Passeriformes		Muscicapidae		Ficedula timorensis	0.908251	0.76	True
Aves	Passeriformes		Muscicapidae		Ficedula tricolor	0.908251	0.76	True
Aves	Passeriformes		Muscicapidae		Ficedula westermanni	0.908251	0.76	True
Aves	Passeriformes		Muscicapidae		Ficedula zanthopygia	0.908251	0.76	True
Aves	Passeriformes		Muscicapidae		Fraseria cinerascens	0.908251	0.76	True
Aves	Passeriformes		Muscicapidae		Fraseria ocreata	0.908251	0.76	True
Aves	Passeriformes		Turdidae		Geokichla citrina	0.908251	0.76	True
Aves	Passeriformes		Turdidae		Geokichla interpres	0.908251	0.76	True
Aves	Passeriformes		Muscicapidae		Heinrichia calligyna	0.908251	0.76	True
Aves	Passeriformes		Muscicapidae		Hodgsonius phoenicuroides	0.908251	0.76	True
Aves	Passeriformes		Turdidae		Hylocichla mustelina	0.908251	0.76	True
Aves	Passeriformes		Muscicapidae		Irania gutturalis	0.908251	0.76	True
Aves	Passeriformes		Turdidae		Ixoreus naevius	0.908251	0.76	True
Aves	Passeriformes		Muscicapidae		Luscinia brunnea	0.908251	0.76	True
Aves	Passeriformes		Turdidae		Luscinia chrysaea	0.908251	0.76	True
Aves	Passeriformes		Muscicapidae		Luscinia cyane	0.908251	0.76	True
Aves	Passeriformes		Turdidae		Luscinia cyanura	0.908251	0.76	True
Aves	Passeriformes		Muscicapidae		Luscinia hyperythra	0.908251	0.76	True
Aves	Passeriformes		Muscicapidae		Luscinia indica	0.908251	0.76	True
Aves	Passeriformes		Muscicapidae		Luscinia johnstoniae	0.908251	0.76	True
Aves	Passeriformes		Muscicapidae		Luscinia luscinia	0.908251	0.76	True
Aves	Passeriformes		Muscicapidae		Luscinia megarhynchos	0.908251	0.76	True
Aves	Passeriformes		Muscicapidae		Luscinia pectardens	0.908251	0.76	True
Aves	Passeriformes		Muscicapidae		Luscinia sibilans	0.908251	0.76	True
Aves	Passeriformes		Muscicapidae		Luscinia svecica	0.908251	0.76	True
Aves	Passeriformes		Muscicapidae		Melaenornis edolioides	0.908251	0.76	True
Aves	Passeriformes		Muscicapidae		Melaenornis pallidus	0.908251	0.76	True
Aves	Passeriformes		Muscicapidae		Melaenornis silens	0.908251	0.76	True
Aves	Passeriformes		Muscicapidae		Monticola angolensis	0.908251	0.76	True
Aves	Passeriformes		Muscicapidae		Monticola brevipes	0.908251	0.76	True
Aves	Passeriformes		Muscicapidae		Monticola cinclorhynchus	0.908251	0.76	True
Aves	Passeriformes		Turdidae		Monticola erythronotus	0.908251	0.76	True
Aves	Passeriformes		Muscicapidae		Monticola explorator	0.908251	0.76	True
Aves	Passeriformes		Muscicapidae		Monticola gularis	0.908251	0.76	True
Aves	Passeriformes		Turdidae		Monticola imerinus	0.908251	0.76	True
Aves	Passeriformes		Muscicapidae		Monticola rufiventris	0.908251	0.76	True
Aves	Passeriformes		Muscicapidae		Monticola rufocinereus	0.908251	0.76	True
Aves	Passeriformes		Muscicapidae		Monticola rupestris	0.908251	0.76	True
Aves	Passeriformes		Muscicapidae		Monticola saxatilis	0.908251	0.76	True
Aves	Passeriformes		Muscicapidae		Monticola sharpei	0.908251	0.76	True
Aves	Passeriformes		Muscicapidae		Monticola solitarius	0.908251	0.76	True
Aves	Passeriformes		Muscicapidae		Muscicapa adusta	0.908251	0.76	True
Aves	Passeriformes		Muscicapidae		Muscicapa aquatica	0.908251	0.76	True
Aves	Passeriformes		Muscicapidae		Muscicapa caerulescens	0.908251	0.76	True
Aves	Passeriformes		Muscicapidae		Muscicapa cassini	0.908251	0.76	True
Aves	Passeriformes		Muscicapidae		Muscicapa ferruginea	0.908251	0.76	True
Aves	Passeriformes		Muscicapidae		Muscicapa gambagae	0.908251	0.76	True
Aves	Passeriformes		Muscicapidae		Muscicapa griseisticta	0.908251	0.76	True
Aves	Passeriformes		Muscicapidae		Muscicapa infuscata	0.908251	0.76	True
Aves	Passeriformes		Muscicapidae		Muscicapa latirostris	0.908251	0.76	True
Aves	Passeriformes		Muscicapidae		Muscicapa muttui	0.908251	0.76	True
Aves	Passeriformes		Muscicapidae		Muscicapa olivascens	0.908251	0.76	True
Aves	Passeriformes		Muscicapidae		Muscicapa sethsmithi	0.908251	0.76	True
Aves	Passeriformes		Muscicapidae		Muscicapa sibirica	0.908251	0.76	True
Aves	Passeriformes		Muscicapidae		Muscicapella hodgsoni	0.908251	0.76	True
Aves	Passeriformes		Turdidae		Myadestes coloratus	0.908251	0.76	True
Aves	Passeriformes		Turdidae		Myadestes elisabeth	0.908251	0.76	True
Aves	Passeriformes		Turdidae		Myadestes genibarbis	0.908251	0.76	True
Aves	Passeriformes		Turdidae		Myadestes melanops	0.908251	0.76	True
Aves	Passeriformes		Turdidae		Myadestes obscurus	0.908251	0.76	True
Aves	Passeriformes		Turdidae		Myadestes occidentalis	0.908251	0.76	True
Aves	Passeriformes		Turdidae		Myadestes ralloides	0.908251	0.76	True
Aves	Passeriformes		Turdidae		Myadestes townsendi	0.908251	0.76	True
Aves	Passeriformes		Turdidae		Myadestes unicolor	0.908251	0.76	True
Aves	Passeriformes		Muscicapidae		Myiomela diana	0.908251	0.76	True
Aves	Passeriformes		Muscicapidae		Myiomela leucura	0.908251	0.76	True
Aves	Passeriformes		Muscicapidae		Myioparus plumbeus	0.908251	0.76	True
Aves	Passeriformes		Muscicapidae		Myophonus caeruleus	0.908251	0.76	True
Aves	Passeriformes		Muscicapidae		Myophonus glaucinus	0.908251	0.76	True
Aves	Passeriformes		Muscicapidae		Myophonus melanurus	0.908251	0.76	True
Aves	Passeriformes		Muscicapidae		Myrmecocichla aethiops	0.908251	0.76	True
Aves	Passeriformes		Muscicapidae		Myrmecocichla albifrons	0.908251	0.76	True
Aves	Passeriformes		Muscicapidae		Myrmecocichla arnotti	0.908251	0.76	True
Aves	Passeriformes		Muscicapidae		Myrmecocichla collaris	0.908251	0.76	True
Aves	Passeriformes		Muscicapidae		Myrmecocichla formicivora	0.908251	0.76	True
Aves	Passeriformes		Muscicapidae		Myrmecocichla melaena	0.908251	0.76	True
Aves	Passeriformes		Muscicapidae		Myrmecocichla nigra	0.908251	0.76	True
Aves	Passeriformes		Muscicapidae		Namibornis herero	0.908251	0.76	True
Aves	Passeriformes		Turdidae		Neocossyphus poensis	0.908251	0.76	True
Aves	Passeriformes		Turdidae		Neocossyphus rufus	0.908251	0.76	True
Aves	Passeriformes		Turdidae		Nesocichla eremita	0.908251	0.76	True
Aves	Passeriformes		Muscicapidae		Niltava davidi	0.908251	0.76	True
Aves	Passeriformes		Muscicapidae		Niltava grandis	0.908251	0.76	True
Aves	Passeriformes		Muscicapidae		Niltava macgrigoriae	0.908251	0.76	True
Aves	Passeriformes		Muscicapidae		Niltava sundara	0.908251	0.76	True
Aves	Passeriformes		Muscicapidae		Niltava vivida	0.908251	0.76	True
Aves	Passeriformes		Muscicapidae		Oenanthe albonigra	0.908251	0.76	True
Aves	Passeriformes		Muscicapidae		Oenanthe bottae	0.908251	0.76	True
Aves	Passeriformes		Muscicapidae		Oenanthe chrysopygia	0.908251	0.76	True
Aves	Passeriformes		Muscicapidae		Oenanthe cypriaca	0.908251	0.76	True
Aves	Passeriformes		Muscicapidae		Oenanthe deserti	0.908251	0.76	True
Aves	Passeriformes		Muscicapidae		Oenanthe finschii	0.908251	0.76	True
Aves	Passeriformes		Muscicapidae		Oenanthe hispanica	0.908251	0.76	True
Aves	Passeriformes		Muscicapidae		Oenanthe isabellina	0.908251	0.76	True
Aves	Passeriformes		Muscicapidae		Oenanthe leucopyga	0.908251	0.76	True
Aves	Passeriformes		Muscicapidae		Oenanthe leucura	0.908251	0.76	True
Aves	Passeriformes		Muscicapidae		Oenanthe lugens	0.908251	0.76	True
Aves	Passeriformes		Muscicapidae		Oenanthe moesta	0.908251	0.76	True
Aves	Passeriformes		Muscicapidae		Oenanthe monacha	0.908251	0.76	True
Aves	Passeriformes		Muscicapidae		Oenanthe monticola	0.908251	0.76	True
Aves	Passeriformes		Muscicapidae		Oenanthe oenanthe	0.908251	0.76	True
Aves	Passeriformes		Muscicapidae		Oenanthe persica	0.908251	0.76	True
Aves	Passeriformes		Muscicapidae		Oenanthe phillipsi	0.908251	0.76	True
Aves	Passeriformes		Muscicapidae		Oenanthe picata	0.908251	0.76	True
Aves	Passeriformes		Muscicapidae		Oenanthe pileata	0.908251	0.76	True
Aves	Passeriformes		Muscicapidae		Oenanthe pleschanka	0.908251	0.76	True
Aves	Passeriformes		Muscicapidae		Oenanthe schalowi	0.908251	0.76	True
Aves	Passeriformes		Muscicapidae		Oenanthe xanthoprymna	0.908251	0.76	True
Aves	Passeriformes		Sylviidae		Paradoxornis alphonsianus	0.908251	0.76	True
Aves	Passeriformes		Sylviidae		Paradoxornis davidianus	0.908251	0.76	True
Aves	Passeriformes		Sylviidae		Paradoxornis gularis	0.908251	0.76	True
Aves	Passeriformes		Sylviidae		Paradoxornis guttaticollis	0.908251	0.76	True
Aves	Passeriformes		Sylviidae		Paradoxornis nipalensis	0.908251	0.76	True
Aves	Passeriformes		Sylviidae		Paradoxornis webbianus	0.908251	0.76	True
Aves	Passeriformes		Muscicapidae		Phoenicurus auroreus	0.908251	0.76	True
Aves	Passeriformes		Muscicapidae		Phoenicurus caeruleocephala	0.908251	0.76	True
Aves	Passeriformes		Muscicapidae		Phoenicurus erythrogastrus	0.908251	0.76	True
Aves	Passeriformes		Muscicapidae		Phoenicurus erythronotus	0.908251	0.76	True
Aves	Passeriformes		Muscicapidae		Phoenicurus frontalis	0.908251	0.76	True
Aves	Passeriformes		Muscicapidae		Phoenicurus hodgsoni	0.908251	0.76	True
Aves	Passeriformes		Muscicapidae		Phoenicurus moussieri	0.908251	0.76	True
Aves	Passeriformes		Muscicapidae		Phoenicurus ochruros	0.908251	0.76	True
Aves	Passeriformes		Muscicapidae		Phoenicurus phoenicurus	0.908251	0.76	True
Aves	Passeriformes		Muscicapidae		Phoenicurus schisticeps	0.908251	0.76	True
Aves	Passeriformes		Turdidae		Platycichla flavipes	0.908251	0.76	True
Aves	Passeriformes		Muscicapidae		Pogonocichla stellata	0.908251	0.76	True
Aves	Passeriformes		Turdidae		Psophocichla litsitsirupa	0.908251	0.76	True
Aves	Passeriformes		Muscicapidae		Rhinomyias additus	0.908251	0.76	True
Aves	Passeriformes		Muscicapidae		Rhinomyias insignis	0.908251	0.76	True
Aves	Passeriformes		Muscicapidae		Rhinomyias olivaceus	0.908251	0.76	True
Aves	Passeriformes		Muscicapidae		Rhinomyias ruficauda	0.908251	0.76	True
Aves	Passeriformes		Muscicapidae		Rhinomyias umbratilis	0.908251	0.76	True
Aves	Passeriformes		Muscicapidae		Rhyacornis bicolor	0.908251	0.76	True
Aves	Passeriformes		Muscicapidae		Rhyacornis fuliginosa	0.908251	0.76	True
Aves	Passeriformes		Muscicapidae		Saxicola caprata	0.908251	0.76	True
Aves	Passeriformes		Muscicapidae		Saxicola dacotiae	0.908251	0.76	True
Aves	Passeriformes		Muscicapidae		Saxicola ferreus	0.908251	0.76	True
Aves	Passeriformes		Muscicapidae		Saxicola gutturalis	0.908251	0.76	True
Aves	Passeriformes		Muscicapidae		Saxicola insignis	0.908251	0.76	True
Aves	Passeriformes		Muscicapidae		Saxicola jerdoni	0.908251	0.76	True
Aves	Passeriformes		Muscicapidae		Saxicola leucurus	0.908251	0.76	True
Aves	Passeriformes		Muscicapidae		Saxicola rubetra	0.908251	0.76	True
Aves	Passeriformes		Muscicapidae		Saxicola tectes	0.908251	0.76	True
Aves	Passeriformes		Muscicapidae		Saxicola torquata	0.908251	0.76	True
Aves	Passeriformes		Muscicapidae		Saxicoloides fulicatus	0.908251	0.76	True
Aves	Passeriformes		Muscicapidae		Sheppardia aequatorialis	0.908251	0.76	True
Aves	Passeriformes		Muscicapidae		Sheppardia aurantiithorax	0.908251	0.76	True
Aves	Passeriformes		Muscicapidae		Sheppardia bocagei	0.908251	0.76	True
Aves	Passeriformes		Muscicapidae		Sheppardia cyornithopsis	0.908251	0.76	True
Aves	Passeriformes		Muscicapidae		Sheppardia gabela	0.908251	0.76	True
Aves	Passeriformes		Muscicapidae		Sheppardia gunningi	0.908251	0.76	True
Aves	Passeriformes		Muscicapidae		Sheppardia lowei	0.908251	0.76	True
Aves	Passeriformes		Muscicapidae		Sheppardia montana	0.908251	0.76	True
Aves	Passeriformes		Muscicapidae		Sheppardia poensis	0.908251	0.76	True
Aves	Passeriformes		Muscicapidae		Sheppardia sharpei	0.908251	0.76	True
Aves	Passeriformes		Turdidae		Sialia currucoides	0.908251	0.76	True
Aves	Passeriformes		Turdidae		Sialia mexicana	0.908251	0.76	True
Aves	Passeriformes		Turdidae		Sialia sialis	0.908251	0.76	True
Aves	Passeriformes		Muscicapidae		Stiphrornis erythrothorax	0.908251	0.76	True
Aves	Passeriformes		Turdidae		Stiphrornis sanghensis	0.908251	0.76	True
Aves	Passeriformes		Turdidae		Stizorhina finschi	0.908251	0.76	True
Aves	Passeriformes		Turdidae		Stizorhina fraseri	0.908251	0.76	True
Aves	Passeriformes		Muscicapidae		Swynnertonia swynnertoni	0.908251	0.76	True
Aves	Passeriformes		Muscicapidae		Thamnolaea cinnamomeiventris	0.908251	0.76	True
Aves	Passeriformes		Muscicapidae		Thamnolaea semirufa	0.908251	0.76	True
Aves	Passeriformes		Muscicapidae		Trichixos pyrropygus	0.908251	0.76	True
Aves	Passeriformes		Turdidae		Turdus abyssinicus	0.908251	0.76	True
Aves	Passeriformes		Turdidae		Turdus albicollis	0.908251	0.76	True
Aves	Passeriformes		Turdidae		Turdus albocinctus	0.908251	0.76	True
Aves	Passeriformes		Turdidae		Turdus amaurochalinus	0.908251	0.76	True
Aves	Passeriformes		Turdidae		Turdus assimilis	0.908251	0.76	True
Aves	Passeriformes		Turdidae		Turdus atrogularis	0.908251	0.76	True
Aves	Passeriformes		Turdidae		Turdus aurantius	0.908251	0.76	True
Aves	Passeriformes		Turdidae		Turdus bewsheri	0.908251	0.76	True
Aves	Passeriformes		Turdidae		Turdus boulboul	0.908251	0.76	True
Aves	Passeriformes		Turdidae		Turdus cardis	0.908251	0.76	True
Aves	Passeriformes		Turdidae		Turdus celaenops	0.908251	0.76	True
Aves	Passeriformes		Turdidae		Turdus chiguanco	0.908251	0.76	True
Aves	Passeriformes		Turdidae		Turdus chrysolaus	0.908251	0.76	True
Aves	Passeriformes		Turdidae		Turdus dissimilis	0.908251	0.76	True
Aves	Passeriformes		Turdidae		Turdus eunomus	0.908251	0.76	True
Aves	Passeriformes		Turdidae		Turdus falcklandii	0.908251	0.76	True
Aves	Passeriformes		Turdidae		Turdus feae	0.908251	0.76	True
Aves	Passeriformes		Turdidae		Turdus fulviventris	0.908251	0.76	True
Aves	Passeriformes		Turdidae		Turdus fumigatus	0.908251	0.76	True
Aves	Passeriformes		Turdidae		Turdus fuscater	0.908251	0.76	True
Aves	Passeriformes		Turdidae		Turdus grayi	0.908251	0.76	True
Aves	Passeriformes		Turdidae		Turdus haplochrous	0.908251	0.76	True
Aves	Passeriformes		Turdidae		Turdus hauxwelli	0.908251	0.76	True
Aves	Passeriformes		Turdidae		Turdus helleri	0.908251	0.76	True
Aves	Passeriformes		Turdidae		Turdus hortulorum	0.908251	0.76	True
Aves	Passeriformes		Turdidae		Turdus ignobilis	0.908251	0.76	True
Aves	Passeriformes		Turdidae		Turdus iliacus	0.908251	0.76	True
Aves	Passeriformes		Turdidae		Turdus infuscatus	0.908251	0.76	True
Aves	Passeriformes		Turdidae		Turdus jamaicensis	0.908251	0.76	True
Aves	Passeriformes		Turdidae		Turdus kessleri	0.908251	0.76	True
Aves	Passeriformes		Turdidae		Turdus lawrencii	0.908251	0.76	True
Aves	Passeriformes		Turdidae		Turdus leucomelas	0.908251	0.76	True
Aves	Passeriformes		Turdidae		Turdus leucops	0.908251	0.76	True
Aves	Passeriformes		Turdidae		Turdus libonyana	0.908251	0.76	True
Aves	Passeriformes		Turdidae		Turdus ludoviciae	0.908251	0.76	True
Aves	Passeriformes		Turdidae		Turdus maculirostris	0.908251	0.76	True
Aves	Passeriformes		Turdidae		Turdus mandarinus	0.908251	0.76	True
Aves	Passeriformes		Turdidae		Turdus maranonicus	0.908251	0.76	True
Aves	Passeriformes		Turdidae		Turdus maximus	0.908251	0.76	True
Aves	Passeriformes		Turdidae		Turdus menachensis	0.908251	0.76	True
Aves	Passeriformes		Turdidae		Turdus merula	0.908251	0.76	True
Aves	Passeriformes		Turdidae		Turdus migratorius	0.908251	0.76	True
Aves	Passeriformes		Turdidae		Turdus mupinensis	0.908251	0.76	True
Aves	Passeriformes		Turdidae		Turdus naumanni	0.908251	0.76	True
Aves	Passeriformes		Turdidae		Turdus nigrescens	0.908251	0.76	True
Aves	Passeriformes		Turdidae		Turdus nigriceps	0.908251	0.76	True
Aves	Passeriformes		Turdidae		Turdus niveiceps	0.908251	0.76	True
Aves	Passeriformes		Turdidae		Turdus nudigenis	0.908251	0.76	True
Aves	Passeriformes		Turdidae		Turdus obscurus	0.908251	0.76	True
Aves	Passeriformes		Turdidae		Turdus obsoletus	0.908251	0.76	True
Aves	Passeriformes		Turdidae		Turdus olivaceofuscus	0.908251	0.76	True
Aves	Passeriformes		Turdidae		Turdus olivaceus	0.908251	0.76	True
Aves	Passeriformes		Turdidae		Turdus olivater	0.908251	0.76	True
Aves	Passeriformes		Turdidae		Turdus pallidus	0.908251	0.76	True
Aves	Passeriformes		Turdidae		Turdus pelios	0.908251	0.76	True
Aves	Passeriformes		Turdidae		Turdus philomelos	0.908251	0.76	True
Aves	Passeriformes		Turdidae		Turdus pilaris	0.908251	0.76	True
Aves	Passeriformes		Turdidae		Turdus plebejus	0.908251	0.76	True
Aves	Passeriformes		Turdidae		Turdus plumbeus	0.908251	0.76	True
Aves	Passeriformes		Turdidae		Turdus poliocephalus	0.908251	0.76	True
Aves	Passeriformes		Turdidae		Turdus reevei	0.908251	0.76	True
Aves	Passeriformes		Turdidae		Turdus roehli	0.908251	0.76	True
Aves	Passeriformes		Turdidae		Turdus rubrocanus	0.908251	0.76	True
Aves	Passeriformes		Turdidae		Turdus ruficollis	0.908251	0.76	True
Aves	Passeriformes		Turdidae		Turdus rufitorques	0.908251	0.76	True
Aves	Passeriformes		Turdidae		Turdus rufiventris	0.908251	0.76	True
Aves	Passeriformes		Turdidae		Turdus rufopalliatus	0.908251	0.76	True
Aves	Passeriformes		Turdidae		Turdus serranus	0.908251	0.76	True
Aves	Passeriformes		Turdidae		Turdus smithi	0.908251	0.76	True
Aves	Passeriformes		Turdidae		Turdus swalesi	0.908251	0.76	True
Aves	Passeriformes		Turdidae		Turdus tephronotus	0.908251	0.76	True
Aves	Passeriformes		Turdidae		Turdus torquatus	0.908251	0.76	True
Aves	Passeriformes		Turdidae		Turdus unicolor	0.908251	0.76	True
Aves	Passeriformes		Turdidae		Turdus viscivorus	0.908251	0.76	True
Aves	Passeriformes		Turdidae		Zoothera andromedae	0.908251	0.76	True
Aves	Passeriformes		Turdidae		Zoothera camaronensis	0.908251	0.76	True
Aves	Passeriformes		Turdidae		Zoothera cinerea	0.908251	0.76	True
Aves	Passeriformes		Turdidae		Zoothera crossleyi	0.908251	0.76	True
Aves	Passeriformes		Turdidae		Zoothera dauma	0.908251	0.76	True
Aves	Passeriformes		Turdidae		Zoothera dixoni	0.908251	0.76	True
Aves	Passeriformes		Turdidae		Zoothera dohertyi	0.908251	0.76	True
Aves	Passeriformes		Turdidae		Zoothera erythronota	0.908251	0.76	True
Aves	Passeriformes		Turdidae		Zoothera gurneyi	0.908251	0.76	True
Aves	Passeriformes		Turdidae		Zoothera guttata	0.908251	0.76	True
Aves	Passeriformes		Turdidae		Zoothera heinei	0.908251	0.76	True
Aves	Passeriformes		Turdidae		Zoothera lunulata	0.908251	0.76	True
Aves	Passeriformes		Turdidae		Zoothera marginata	0.908251	0.76	True
Aves	Passeriformes		Turdidae		Zoothera mollissima	0.908251	0.76	True
Aves	Passeriformes		Turdidae		Zoothera monticola	0.908251	0.76	True
Aves	Passeriformes		Turdidae		Zoothera oberlaenderi	0.908251	0.76	True
Aves	Passeriformes		Turdidae		Zoothera peronii	0.908251	0.76	True
Aves	Passeriformes		Turdidae		Zoothera piaggiae	0.908251	0.76	True
Aves	Passeriformes		Turdidae		Zoothera pinicola	0.908251	0.76	True
Aves	Passeriformes		Turdidae		Zoothera princei	0.908251	0.76	True
Aves	Passeriformes		Turdidae		Zoothera schistacea	0.908251	0.76	True
Aves	Passeriformes		Turdidae		Zoothera sibirica	0.908251	0.76	True
Aves	Passeriformes		Turdidae		Zoothera talaseae	0.908251	0.76	True
Aves	Passeriformes		Turdidae		Zoothera tanganjicae	0.908251	0.76	True
Aves	Passeriformes		Turdidae		Zoothera wardii	0.908251	0.76	True
Aves	Passeriformes		Cotingidae	Tityrinae	Laniocera hypopyrra	0.904892	0.76	True
Aves	Passeriformes		Tyrannidae		Myiobius atricaudus	0.904892	0.76	True
Aves	Passeriformes		Tyrannidae		Myiobius barbatus	0.904892	0.76	True
Aves	Passeriformes		Tyrannidae		Myiobius sulphureipygius	0.904892	0.76	True
Aves	Passeriformes		Tyrannidae		Myiobius villosus	0.904892	0.76	True
Aves	Passeriformes		Tyrannidae		Neopipo cinnamomea	0.904892	0.76	True
Aves	Passeriformes		Tyrannidae		Onychorhynchus coronatus	0.904892	0.76	True
Aves	Passeriformes		Tyrannidae		Onychorhynchus occidentalis	0.904892	0.76	True
Aves	Passeriformes		Cotingidae	Tityrinae	Pachyramphus aglaiae	0.904892	0.76	True
Aves	Passeriformes		Cotingidae	Tityrinae	Pachyramphus albogriseus	0.904892	0.76	True
Aves	Passeriformes		Cotingidae	Tityrinae	Pachyramphus castaneus	0.904892	0.76	True
Aves	Passeriformes		Cotingidae	Tityrinae	Pachyramphus cinnamomeus	0.904892	0.76	True
Aves	Passeriformes		Cotingidae	Tityrinae	Pachyramphus homochrous	0.904892	0.76	True
Aves	Passeriformes		Cotingidae	Tityrinae	Pachyramphus major	0.904892	0.76	True
Aves	Passeriformes		Cotingidae	Tityrinae	Pachyramphus marginatus	0.904892	0.76	True
Aves	Passeriformes		Cotingidae	Tityrinae	Pachyramphus minor	0.904892	0.76	True
Aves	Passeriformes		Cotingidae	Tityrinae	Pachyramphus polychopterus	0.904892	0.76	True
Aves	Passeriformes		Cotingidae	Tityrinae	Pachyramphus rufus	0.904892	0.76	True
Aves	Passeriformes		Cotingidae	Tityrinae	Pachyramphus surinamus	0.904892	0.76	True
Aves	Passeriformes		Cotingidae	Tityrinae	Pachyramphus validus	0.904892	0.76	True
Aves	Passeriformes		Cotingidae	Tityrinae	Pachyramphus versicolor	0.904892	0.76	True
Aves	Passeriformes		Cotingidae	Tityrinae	Pachyramphus viridis	0.904892	0.76	True
Aves	Passeriformes		Tyrannidae		Pachyramphus xanthogenys	0.904892	0.76	True
Aves	Passeriformes		Tyrannidae		Platyrinchus coronatus	0.904892	0.76	True
Aves	Passeriformes		Tyrannidae		Platyrinchus leucoryphus	0.904892	0.76	True
Aves	Passeriformes		Tyrannidae		Platyrinchus mystaceus	0.904892	0.76	True
Aves	Passeriformes		Tyrannidae		Platyrinchus platyrhynchos	0.904892	0.76	True
Aves	Passeriformes		Tyrannidae		Platyrinchus saturatus	0.904892	0.76	True
Aves	Passeriformes		Tyrannidae		Terenotriccus erythrurus	0.904892	0.76	True
Aves	Passeriformes		Cotingidae	Tityrinae	Tityra cayana	0.904892	0.76	True
Aves	Passeriformes		Cotingidae	Tityrinae	Tityra inquisitor	0.904892	0.76	True
Aves	Passeriformes		Cotingidae	Tityrinae	Tityra semifasciata	0.904892	0.76	True
Aves	Passeriformes		Cotingidae	Tityrinae	Xenopsaris albinucha	0.904892	0.76	True
Aves	Struthioniformes		Aepyornithidae		Aepyornis hildebrandti	0.904108	0.76	True
Aves	Dinornithiformes		Emeidae		Anomalopteryx didiformis	0.904108	0.76	True
Aves	Apterygiformes		Apterygidae		Apteryx haastii	0.904108	0.76	True
Aves	Apterygiformes		Apterygidae		Apteryx owenii	0.904108	0.76	True
Aves	Apterygiformes		Apterygidae		Apteryx rowi	0.904108	0.76	True
Aves	Casuariiformes		Casuariidae		Casuarius bennetti	0.904108	0.76	True
Aves	Casuariiformes		Casuariidae		Casuarius casuarius	0.904108	0.76	True
Aves	Tinamiformes		Tinamidae		Crypturellus obsoletus	0.904108	0.76	True
Aves	Tinamiformes		Tinamidae		Crypturellus parvirostris	0.904108	0.76	True
Aves	Tinamiformes		Tinamidae		Crypturellus soui	0.904108	0.76	True
Aves	Tinamiformes		Tinamidae		Crypturellus strigulosus	0.904108	0.76	True
Aves	Tinamiformes		Tinamidae		Crypturellus tataupa	0.904108	0.76	True
Aves	Tinamiformes		Tinamidae		Crypturellus undulatus	0.904108	0.76	True
Aves	Tinamiformes		Tinamidae		Crypturellus variegatus	0.904108	0.76	True
Aves	Dinornithiformes		Dinornithidae		Dinornis novaezealandiae	0.904108	0.76	True
Aves	Dinornithiformes		Dinornithidae		Dinornis robustus	0.904108	0.76	True
Aves	Casuariiformes		Dromaiidae		Dromaius novaehollandiae	0.904108	0.76	True
Aves	Dinornithiformes		Emeidae		Emeus crassus	0.904108	0.76	True
Aves	Tinamiformes		Tinamidae		Eudromia elegans	0.904108	0.76	True
Aves	Dinornithiformes		Emeidae		Euryapteryx curtus	0.904108	0.76	True
Aves	Dinornithiformes		Emeidae		Megalapteryx benhami	0.904108	0.76	True
Aves	Dinornithiformes		Emeidae		Megalapteryx didinus	0.904108	0.76	True
Aves	Struthioniformes		Aepyornithidae		Mullerornis agilis	0.904108	0.76	True
Aves	Tinamiformes		Tinamidae		Nothoprocta cinerascens	0.904108	0.76	True
Aves	Tinamiformes		Tinamidae		Nothoprocta perdicaria	0.904108	0.76	True
Aves	Tinamiformes		Tinamidae		Nothura darwinii	0.904108	0.76	True
Aves	Tinamiformes		Tinamidae		Nothura maculosa	0.904108	0.76	True
Aves	Dinornithiformes		Emeidae		Pachyornis australis	0.904108	0.76	True
Aves	Dinornithiformes		Emeidae		Pachyornis elephantopus	0.904108	0.76	True
Aves	Dinornithiformes		Emeidae		Pachyornis geranoides	0.904108	0.76	True
Aves	Dinornithiformes		Emeidae		Pachyornis mappini	0.904108	0.76	True
Aves	Rheiformes		Rheidae		Pterocnemia pennata	0.904108	0.76	True
Aves	Rheiformes		Rheidae		Rhea americana	0.904108	0.76	True
Aves	Tinamiformes		Tinamidae		Rhynchotus rufescens	0.904108	0.76	True
Aves	Struthioniformes		Struthionidae		Struthio camelus	0.904108	0.76	True
Aves	Tinamiformes		Tinamidae		Tinamotis ingoufi	0.904108	0.76	True
Aves	Tinamiformes		Tinamidae		Tinamotis pentlandii	0.904108	0.76	True
Aves	Tinamiformes		Tinamidae		Tinamus major	0.904108	0.76	True
Aves	Piciformes		Ramphastidae		Andigena cucullata	0.900777	0.76	True
Aves	Piciformes		Ramphastidae		Andigena hypoglauca	0.900777	0.76	True
Aves	Piciformes		Ramphastidae		Andigena laminirostris	0.900777	0.76	True
Aves	Piciformes		Ramphastidae		Aulacorhynchus atrogularis	0.900777	0.76	True
Aves	Piciformes		Ramphastidae		Aulacorhynchus caeruleogularis	0.900777	0.76	True
Aves	Piciformes		Ramphastidae		Aulacorhynchus coeruleicinctis	0.900777	0.76	True
Aves	Piciformes		Ramphastidae		Aulacorhynchus derbianus	0.900777	0.76	True
Aves	Piciformes		Ramphastidae		Aulacorhynchus haematopygus	0.900777	0.76	True
Aves	Piciformes		Ramphastidae		Aulacorhynchus prasinus	0.900777	0.76	True
Aves	Piciformes		Ramphastidae		Aulacorhynchus sulcatus	0.900777	0.76	True
Aves	Piciformes		Ramphastidae		Baillonius bailloni	0.900777	0.76	True
Aves	Piciformes		Lybiidae		Buccanodon duchaillui	0.900777	0.76	True
Aves	Psittaciformes		Psittacidae	Cacatuinae	Cacatua alba	0.900777	0.76	True
Aves	Psittaciformes		Psittacidae	Cacatuinae	Cacatua ducorpsii	0.900777	0.76	True
Aves	Psittaciformes		Psittacidae	Cacatuinae	Cacatua galerita	0.900777	0.76	True
Aves	Psittaciformes		Psittacidae	Cacatuinae	Cacatua goffiniana	0.900777	0.76	True
Aves	Psittaciformes		Psittacidae	Cacatuinae	Cacatua haematuropygia	0.900777	0.76	True
Aves	Psittaciformes		Psittacidae	Cacatuinae	Cacatua leadbeateri	0.900777	0.76	True
Aves	Psittaciformes		Psittacidae	Cacatuinae	Cacatua moluccensis	0.900777	0.76	True
Aves	Psittaciformes		Psittacidae	Cacatuinae	Cacatua ophthalmica	0.900777	0.76	True
Aves	Psittaciformes		Psittacidae	Cacatuinae	Cacatua pastinator	0.900777	0.76	True
Aves	Psittaciformes		Psittacidae	Cacatuinae	Cacatua sanguinea	0.900777	0.76	True
Aves	Psittaciformes		Psittacidae	Cacatuinae	Cacatua sulphurea	0.900777	0.76	True
Aves	Piciformes		Megalaimidae		Calorhamphus fuliginosus	0.900777	0.76	True
Aves	Psittaciformes		Psittacidae	Cacatuinae	Calyptorhynchus banksii	0.900777	0.76	True
Aves	Psittaciformes		Psittacidae	Cacatuinae	Calyptorhynchus baudinii	0.900777	0.76	True
Aves	Psittaciformes		Psittacidae	Cacatuinae	Calyptorhynchus funereus	0.900777	0.76	True
Aves	Psittaciformes		Psittacidae	Cacatuinae	Calyptorhynchus lathami	0.900777	0.76	True
Aves	Psittaciformes		Psittacidae	Cacatuinae	Calyptorhynchus latirostris	0.900777	0.76	True
Aves	Piciformes		Capitonidae		Capito auratus	0.900777	0.76	True
Aves	Piciformes		Capitonidae		Capito aurovirens	0.900777	0.76	True
Aves	Piciformes		Capitonidae		Capito dayi	0.900777	0.76	True
Aves	Piciformes		Capitonidae		Capito maculicoronatus	0.900777	0.76	True
Aves	Piciformes		Capitonidae		Capito niger	0.900777	0.76	True
Aves	Piciformes		Capitonidae		Capito quinticolor	0.900777	0.76	True
Aves	Piciformes		Capitonidae		Capito squamatus	0.900777	0.76	True
Aves	Piciformes		Capitonidae		Capito wallacei	0.900777	0.76	True
Aves	Psittaciformes		Psittacidae	Cacatuinae	Eolophus roseicapillus	0.900777	0.76	True
Aves	Piciformes		Capitonidae		Eubucco bourcierii	0.900777	0.76	True
Aves	Piciformes		Capitonidae		Eubucco richardsoni	0.900777	0.76	True
Aves	Piciformes		Lybiidae		Gymnobucco calvus	0.900777	0.76	True
Aves	Piciformes		Lybiidae		Lybius bidentatus	0.900777	0.76	True
Aves	Piciformes		Lybiidae		Lybius dubius	0.900777	0.76	True
Aves	Piciformes		Lybiidae		Lybius melanopterus	0.900777	0.76	True
Aves	Piciformes		Lybiidae		Lybius torquatus	0.900777	0.76	True
Aves	Piciformes		Lybiidae		Lybius vieilloti	0.900777	0.76	True
Aves	Piciformes		Megalaimidae		Megalaima asiatica	0.900777	0.76	True
Aves	Piciformes		Megalaimidae		Megalaima chrysopogon	0.900777	0.76	True
Aves	Piciformes		Megalaimidae		Megalaima franklinii	0.900777	0.76	True
Aves	Piciformes		Megalaimidae		Megalaima haemacephala	0.900777	0.76	True
Aves	Piciformes		Megalaimidae		Megalaima lineata	0.900777	0.76	True
Aves	Piciformes		Megalaimidae		Megalaima malabarica	0.900777	0.76	True
Aves	Piciformes		Megalaimidae		Megalaima monticola	0.900777	0.76	True
Aves	Piciformes		Megalaimidae		Megalaima mystacophanos	0.900777	0.76	True
Aves	Piciformes		Megalaimidae		Megalaima oorti	0.900777	0.76	True
Aves	Piciformes		Megalaimidae		Megalaima rubricapillus	0.900777	0.76	True
Aves	Piciformes		Megalaimidae		Megalaima virens	0.900777	0.76	True
Aves	Piciformes		Megalaimidae		Megalaima viridis	0.900777	0.76	True
Aves	Psittaciformes		Psittacidae	Nestorinae	Nestor meridionalis	0.900777	0.76	True
Aves	Psittaciformes		Psittacidae	Nestorinae	Nestor notabilis	0.900777	0.76	True
Aves	Psittaciformes		Psittacidae	Cacatuinae	Nymphicus hollandicus	0.900777	0.76	True
Aves	Piciformes		Lybiidae		Pogoniulus atroflavus	0.900777	0.76	True
Aves	Piciformes		Lybiidae		Pogoniulus bilineatus	0.900777	0.76	True
Aves	Piciformes		Lybiidae		Pogoniulus chrysoconus	0.900777	0.76	True
Aves	Piciformes		Lybiidae		Pogoniulus coryphaeus	0.900777	0.76	True
Aves	Piciformes		Lybiidae		Pogoniulus pusillus	0.900777	0.76	True
Aves	Piciformes		Lybiidae		Pogoniulus scolopaceus	0.900777	0.76	True
Aves	Psittaciformes		Psittacidae	Cacatuinae	Probosciger aterrimus	0.900777	0.76	True
Aves	Piciformes		Megalaimidae		Psilopogon pyrolophus	0.900777	0.76	True
Aves	Piciformes		Ramphastidae		Pteroglossus aracari	0.900777	0.76	True
Aves	Piciformes		Ramphastidae		Pteroglossus azara	0.900777	0.76	True
Aves	Piciformes		Ramphastidae		Pteroglossus bailloni	0.900777	0.76	True
Aves	Piciformes		Ramphastidae		Pteroglossus beauharnaesii	0.900777	0.76	True
Aves	Piciformes		Ramphastidae		Pteroglossus bitorquatus	0.900777	0.76	True
Aves	Piciformes		Ramphastidae		Pteroglossus castanotis	0.900777	0.76	True
Aves	Piciformes		Ramphastidae		Pteroglossus erythropygius	0.900777	0.76	True
Aves	Piciformes		Ramphastidae		Pteroglossus frantzii	0.900777	0.76	True
Aves	Piciformes		Ramphastidae		Pteroglossus inscriptus	0.900777	0.76	True
Aves	Piciformes		Ramphastidae		Pteroglossus mariae	0.900777	0.76	True
Aves	Piciformes		Ramphastidae		Pteroglossus pluricinctus	0.900777	0.76	True
Aves	Piciformes		Ramphastidae		Pteroglossus sanguineus	0.900777	0.76	True
Aves	Piciformes		Ramphastidae		Pteroglossus torquatus	0.900777	0.76	True
Aves	Piciformes		Ramphastidae		Pteroglossus viridis	0.900777	0.76	True
Aves	Piciformes		Ramphastidae		Ramphastos ambiguus	0.900777	0.76	True
Aves	Piciformes		Ramphastidae		Ramphastos ariel	0.900777	0.76	True
Aves	Piciformes		Ramphastidae		Ramphastos brevis	0.900777	0.76	True
Aves	Piciformes		Ramphastidae		Ramphastos culminatus	0.900777	0.76	True
Aves	Piciformes		Ramphastidae		Ramphastos cuvieri	0.900777	0.76	True
Aves	Piciformes		Ramphastidae		Ramphastos dicolorus	0.900777	0.76	True
Aves	Piciformes		Ramphastidae		Ramphastos sulfuratus	0.900777	0.76	True
Aves	Piciformes		Ramphastidae		Ramphastos swainsonii	0.900777	0.76	True
Aves	Piciformes		Ramphastidae		Ramphastos toco	0.900777	0.76	True
Aves	Piciformes		Ramphastidae		Ramphastos tucanus	0.900777	0.76	True
Aves	Piciformes		Ramphastidae		Ramphastos vitellinus	0.900777	0.76	True
Aves	Piciformes		Ramphastidae		Selenidera gouldii	0.900777	0.76	True
Aves	Piciformes		Ramphastidae		Selenidera maculirostris	0.900777	0.76	True
Aves	Piciformes		Ramphastidae		Selenidera nattereri	0.900777	0.76	True
Aves	Piciformes		Ramphastidae		Selenidera piperivora	0.900777	0.76	True
Aves	Piciformes		Ramphastidae		Selenidera reinwardtii	0.900777	0.76	True
Aves	Piciformes		Semnornithidae		Semnornis frantzii	0.900777	0.76	True
Aves	Piciformes		Semnornithidae		Semnornis ramphastinus	0.900777	0.76	True
Aves	Piciformes		Lybiidae		Stactolaema leucotis	0.900777	0.76	True
Aves	Piciformes		Lybiidae		Stactolaema olivacea	0.900777	0.76	True
Aves	Piciformes		Lybiidae		Stactolaema whytii	0.900777	0.76	True
Aves	Psittaciformes		Psittacidae	Strigopinae	Strigops habroptila	0.900777	0.76	True
Aves	Piciformes		Lybiidae		Trachyphonus darnaudii	0.900777	0.76	True
Aves	Piciformes		Lybiidae		Trachyphonus erythrocephalus	0.900777	0.76	True
Aves	Piciformes		Lybiidae		Trachyphonus purpuratus	0.900777	0.76	True
Aves	Piciformes		Lybiidae		Trachyphonus usambiro	0.900777	0.76	True
Aves	Piciformes		Lybiidae		Tricholaema diademata	0.900777	0.76	True
Aves	Piciformes		Lybiidae		Tricholaema hirsuta	0.900777	0.76	True
Aves	Piciformes		Lybiidae		Tricholaema lachrymosa	0.900777	0.76	True
Aves	Piciformes		Lybiidae		Tricholaema leucomelas	0.900777	0.76	True
Aves	Passeriformes		Rhinocryptidae		Acropternis orthonyx	0.89771	0.76	True
Aves	Passeriformes		Thamnophilidae		Cercomacra brasiliana	0.89771	0.76	True
Aves	Passeriformes		Thamnophilidae		Cercomacra carbonaria	0.89771	0.76	True
Aves	Passeriformes		Thamnophilidae		Cercomacra cinerascens	0.89771	0.76	True
Aves	Passeriformes		Thamnophilidae		Cercomacra ferdinandi	0.89771	0.76	True
Aves	Passeriformes		Thamnophilidae		Cercomacra laeta	0.89771	0.76	True
Aves	Passeriformes		Thamnophilidae		Cercomacra manu	0.89771	0.76	True
Aves	Passeriformes		Thamnophilidae		Cercomacra melanaria	0.89771	0.76	True
Aves	Passeriformes		Thamnophilidae		Cercomacra nigrescens	0.89771	0.76	True
Aves	Passeriformes		Thamnophilidae		Cercomacra nigricans	0.89771	0.76	True
Aves	Passeriformes		Thamnophilidae		Cercomacra parkeri	0.89771	0.76	True
Aves	Passeriformes		Thamnophilidae		Cercomacra serva	0.89771	0.76	True
Aves	Passeriformes		Thamnophilidae		Cercomacra tyrannina	0.89771	0.76	True
Aves	Passeriformes		Formicariidae		Chamaeza campanisona	0.89771	0.76	True
Aves	Passeriformes		Formicariidae		Chamaeza meruloides	0.89771	0.76	True
Aves	Passeriformes		Formicariidae		Chamaeza mollisima	0.89771	0.76	True
Aves	Passeriformes		Formicariidae		Chamaeza nobilis	0.89771	0.76	True
Aves	Passeriformes		Conopophagidae		Conopophaga ardesiaca	0.89771	0.76	True
Aves	Passeriformes		Conopophagidae		Conopophaga aurita	0.89771	0.76	True
Aves	Passeriformes		Conopophagidae		Conopophaga castaneiceps	0.89771	0.76	True
Aves	Passeriformes		Conopophagidae		Conopophaga cearae	0.89771	0.76	True
Aves	Passeriformes		Conopophagidae		Conopophaga lineata	0.89771	0.76	True
Aves	Passeriformes		Conopophagidae		Conopophaga melanogaster	0.89771	0.76	True
Aves	Passeriformes		Conopophagidae		Conopophaga melanops	0.89771	0.76	True
Aves	Passeriformes		Conopophagidae		Conopophaga peruviana	0.89771	0.76	True
Aves	Passeriformes		Conopophagidae		Conopophaga roberti	0.89771	0.76	True
Aves	Passeriformes		Rhinocryptidae		Eleoscytalopus indigoticus	0.89771	0.76	True
Aves	Passeriformes		Rhinocryptidae		Eleoscytalopus psychopompus	0.89771	0.76	True
Aves	Passeriformes		Rhinocryptidae		Eugralla paradoxa	0.89771	0.76	True
Aves	Passeriformes		Formicariidae		Formicarius analis	0.89771	0.76	True
Aves	Passeriformes		Formicariidae		Formicarius colma	0.89771	0.76	True
Aves	Passeriformes		Formicariidae		Formicarius nigricapillus	0.89771	0.76	True
Aves	Passeriformes		Grallariidae		Grallaria andicolus	0.89771	0.76	True
Aves	Passeriformes		Grallariidae		Grallaria blakei	0.89771	0.76	True
Aves	Passeriformes		Grallariidae		Grallaria dignissima	0.89771	0.76	True
Aves	Passeriformes		Grallariidae		Grallaria eludens	0.89771	0.76	True
Aves	Passeriformes		Grallariidae		Grallaria guatimalensis	0.89771	0.76	True
Aves	Passeriformes		Grallariidae		Grallaria hypoleuca	0.89771	0.76	True
Aves	Passeriformes		Grallariidae		Grallaria nuchalis	0.89771	0.76	True
Aves	Passeriformes		Grallariidae		Grallaria ruficapilla	0.89771	0.76	True
Aves	Passeriformes		Grallariidae		Grallaria rufula	0.89771	0.76	True
Aves	Passeriformes		Grallariidae		Grallaria squamigera	0.89771	0.76	True
Aves	Passeriformes		Grallariidae		Grallaria varia	0.89771	0.76	True
Aves	Passeriformes		Grallariidae		Grallaria watkinsi	0.89771	0.76	True
Aves	Passeriformes		Grallariidae		Grallaricula flavirostris	0.89771	0.76	True
Aves	Passeriformes		Grallariidae		Grallaricula lineifrons	0.89771	0.76	True
Aves	Passeriformes		Grallariidae		Grallaricula nana	0.89771	0.76	True
Aves	Passeriformes		Grallariidae		Hylopezus berlepschi	0.89771	0.76	True
Aves	Passeriformes		Grallariidae		Hylopezus fulviventris	0.89771	0.76	True
Aves	Passeriformes		Grallariidae		Hylopezus ochroleucus	0.89771	0.76	True
Aves	Passeriformes		Rhinocryptidae		Liosceles thoracicus	0.89771	0.76	True
Aves	Passeriformes		Melanopareiidae		Melanopareia elegans	0.89771	0.76	True
Aves	Passeriformes		Melanopareiidae		Melanopareia maximiliani	0.89771	0.76	True
Aves	Passeriformes		Melanopareiidae		Melanopareia torquata	0.89771	0.76	True
Aves	Passeriformes		Rhinocryptidae		Merulaxis ater	0.89771	0.76	True
Aves	Passeriformes		Rhinocryptidae		Myornis senilis	0.89771	0.76	True
Aves	Passeriformes		Grallariidae		Myrmothera campanisona	0.89771	0.76	True
Aves	Passeriformes		Grallariidae		Myrmothera simplex	0.89771	0.76	True
Aves	Passeriformes		Conopophagidae		Pittasoma michleri	0.89771	0.76	True
Aves	Passeriformes		Conopophagidae		Pittasoma rufopileatum	0.89771	0.76	True
Aves	Passeriformes		Rhinocryptidae		Psilorhamphus guttatus	0.89771	0.76	True
Aves	Passeriformes		Rhinocryptidae		Pteroptochos castaneus	0.89771	0.76	True
Aves	Passeriformes		Rhinocryptidae		Pteroptochos megapodius	0.89771	0.76	True
Aves	Passeriformes		Rhinocryptidae		Pteroptochos tarnii	0.89771	0.76	True
Aves	Passeriformes		Thamnophilidae		Pyriglena leuconota	0.89771	0.76	True
Aves	Passeriformes		Thamnophilidae		Pyriglena leucoptera	0.89771	0.76	True
Aves	Passeriformes		Rhinocryptidae		Rhinocrypta lanceolata	0.89771	0.76	True
Aves	Passeriformes		Rhinocryptidae		Scelorchilus rubecula	0.89771	0.76	True
Aves	Passeriformes		Rhinocryptidae		Scytalopus affinis	0.89771	0.76	True
Aves	Passeriformes		Rhinocryptidae		Scytalopus argentifrons	0.89771	0.76	True
Aves	Passeriformes		Rhinocryptidae		Scytalopus atratus	0.89771	0.76	True
Aves	Passeriformes		Rhinocryptidae		Scytalopus canus	0.89771	0.76	True
Aves	Passeriformes		Rhinocryptidae		Scytalopus femoralis	0.89771	0.76	True
Aves	Passeriformes		Rhinocryptidae		Scytalopus fuscus	0.89771	0.76	True
Aves	Passeriformes		Rhinocryptidae		Scytalopus griseicollis	0.89771	0.76	True
Aves	Passeriformes		Rhinocryptidae		Scytalopus iraiensis	0.89771	0.76	True
Aves	Passeriformes		Rhinocryptidae		Scytalopus latebricola	0.89771	0.76	True
Aves	Passeriformes		Rhinocryptidae		Scytalopus latrans	0.89771	0.76	True
Aves	Passeriformes		Rhinocryptidae		Scytalopus magellanicus	0.89771	0.76	True
Aves	Passeriformes		Rhinocryptidae		Scytalopus micropterus	0.89771	0.76	True
Aves	Passeriformes		Rhinocryptidae		Scytalopus novacapitalis	0.89771	0.76	True
Aves	Passeriformes		Rhinocryptidae		Scytalopus pachecoi	0.89771	0.76	True
Aves	Passeriformes		Rhinocryptidae		Scytalopus parvirostris	0.89771	0.76	True
Aves	Passeriformes		Rhinocryptidae		Scytalopus schulenbergi	0.89771	0.76	True
Aves	Passeriformes		Rhinocryptidae		Scytalopus superciliaris	0.89771	0.76	True
Aves	Passeriformes		Rhinocryptidae		Scytalopus unicolor	0.89771	0.76	True
Aves	Passeriformes		Rhinocryptidae		Scytalopus vicinior	0.89771	0.76	True
Aves	Passeriformes		Rhinocryptidae		Scytalopus zimmeri	0.89771	0.76	True
Aves	Passeriformes		Rhinocryptidae		Teledromas fuscus	0.89771	0.76	True
Aves	Leptosomiformes		Leptosomidae		Leptosomus discolor	0.871149	0.76	True
Aves	Anseriformes		Anhimidae		Anhima cornuta	0.870058	0.76	True
Aves	Anseriformes		Anseranatidae		Anseranas semipalmata	0.870058	0.76	True
Aves	Anseriformes		Anhimidae		Chauna torquata	0.870058	0.76	True
Aves	Passeriformes		Ptilonorhynchidae		Ailuroedus crassirostris	0.862859	0.76	True
Aves	Passeriformes		Ptilonorhynchidae		Ailuroedus melanotis	0.862859	0.76	True
Aves	Passeriformes		Ptilonorhynchidae		Amblyornis inornatus	0.862859	0.76	True
Aves	Passeriformes		Ptilonorhynchidae		Amblyornis macgregoriae	0.862859	0.76	True
Aves	Passeriformes		Ptilonorhynchidae		Amblyornis subalaris	0.862859	0.76	True
Aves	Passeriformes		Ptilonorhynchidae		Archboldia papuensis	0.862859	0.76	True
Aves	Passeriformes		Ptilonorhynchidae		Chlamydera cerviniventris	0.862859	0.76	True
Aves	Passeriformes		Ptilonorhynchidae		Chlamydera lauterbachi	0.862859	0.76	True
Aves	Passeriformes		Ptilonorhynchidae		Chlamydera maculata	0.862859	0.76	True
Aves	Passeriformes		Ptilonorhynchidae		Chlamydera nuchalis	0.862859	0.76	True
Aves	Passeriformes		Turdidae		Chlamydochaera jefferyi	0.862859	0.76	True
Aves	Passeriformes		Climacteridae		Climacteris erythrops	0.862859	0.76	True
Aves	Passeriformes		Climacteridae		Climacteris picumnus	0.862859	0.76	True
Aves	Passeriformes		Climacteridae		Climacteris rufus	0.862859	0.76	True
Aves	Passeriformes		Climacteridae		Cormobates leucophaeus	0.862859	0.76	True
Aves	Passeriformes		Climacteridae		Cormobates placens	0.862859	0.76	True
Aves	Passeriformes		Ptilonorhynchidae		Prionodura newtoniana	0.862859	0.76	True
Aves	Passeriformes		Ptilonorhynchidae		Ptilonorhynchus violaceus	0.862859	0.76	True
Aves	Passeriformes		Ptilonorhynchidae		Scenopoeetes dentirostris	0.862859	0.76	True
Aves	Passeriformes		Ptilonorhynchidae		Sericulus aureus	0.862859	0.76	True
Aves	Passeriformes		Ptilonorhynchidae		Sericulus bakeri	0.862859	0.76	True
Aves	Passeriformes		Ptilonorhynchidae		Sericulus chrysocephalus	0.862859	0.76	True
Aves	Bucerotiformes		Bucerotidae		Aceros cassidix	0.861809	0.76	True
Aves	Bucerotiformes		Bucerotidae		Aceros corrugatus	0.861809	0.76	True
Aves	Bucerotiformes		Bucerotidae		Aceros nipalensis	0.861809	0.76	True
Aves	Passeriformes		Cotingidae	Rupicolinae	Ampelioides tschudii	0.861809	0.76	True
Aves	Passeriformes		Cotingidae	Phytotominae	Ampelion rubrocristatus	0.861809	0.76	True
Aves	Passeriformes		Cotingidae	Phytotominae	Ampelion rufaxilla	0.861809	0.76	True
Aves	Bucerotiformes		Bucerotidae		Anorrhinus austeni	0.861809	0.76	True
Aves	Bucerotiformes		Bucerotidae		Anorrhinus galeritus	0.861809	0.76	True
Aves	Bucerotiformes		Bucerotidae		Anorrhinus tickelli	0.861809	0.76	True
Aves	Bucerotiformes		Bucerotidae		Anthracoceros albirostris	0.861809	0.76	True
Aves	Bucerotiformes		Bucerotidae		Anthracoceros convexus	0.861809	0.76	True
Aves	Bucerotiformes		Bucerotidae		Anthracoceros malayanus	0.861809	0.76	True
Aves	Passeriformes		Pipridae		Antilophia galeata	0.861809	0.76	True
Aves	Coraciiformes		Brachypteraciidae		Atelornis crossleyi	0.861809	0.76	True
Aves	Coraciiformes		Brachypteraciidae		Atelornis pittoides	0.861809	0.76	True
Aves	Bucerotiformes		Bucerotidae		Berenicornis comatus	0.861809	0.76	True
Aves	Coraciiformes		Brachypteraciidae		Brachypteracias leptosomus	0.861809	0.76	True
Aves	Coraciiformes		Brachypteraciidae		Brachypteracias squamigera	0.861809	0.76	True
Aves	Bucerotiformes		Bucerotidae		Buceros bicornis	0.861809	0.76	True
Aves	Bucerotiformes		Bucerotidae		Buceros rhinoceros	0.861809	0.76	True
Aves	Bucerotiformes		Bucorvidae		Bucorvus abyssinicus	0.861809	0.76	True
Aves	Bucerotiformes		Bucorvidae		Bucorvus leadbeateri	0.861809	0.76	True
Aves	Bucerotiformes		Bucerotidae		Bycanistes brevis	0.861809	0.76	True
Aves	Bucerotiformes		Bucerotidae		Bycanistes bucinator	0.861809	0.76	True
Aves	Bucerotiformes		Bucerotidae		Bycanistes subcylindricus	0.861809	0.76	True
Aves	Passeriformes		Cotingidae	Cotinginae	Carpodectes hopkei	0.861809	0.76	True
Aves	Passeriformes		Cotingidae	Rupicolinae	Carpornis melanocephala	0.861809	0.76	True
Aves	Passeriformes		Cotingidae	Cotinginae	Cephalopterus ornatus	0.861809	0.76	True
Aves	Bucerotiformes		Bucerotidae		Ceratogymna atrata	0.861809	0.76	True
Aves	Passeriformes		Pipridae		Chiroxiphia boliviana	0.861809	0.76	True
Aves	Passeriformes		Pipridae		Chiroxiphia caudata	0.861809	0.76	True
Aves	Passeriformes		Pipridae		Chiroxiphia linearis	0.861809	0.76	True
Aves	Passeriformes		Pipridae		Chiroxiphia pareola	0.861809	0.76	True
Aves	Passeriformes		Cotingidae	Cotinginae	Conioptilon mcilhennyi	0.861809	0.76	True
Aves	Coraciiformes		Coraciidae		Coracias abyssinica	0.861809	0.76	True
Aves	Coraciiformes		Coraciidae		Coracias caudatus	0.861809	0.76	True
Aves	Coraciiformes		Coraciidae		Coracias garrulus	0.861809	0.76	True
Aves	Passeriformes		Pipridae		Corapipo altera	0.861809	0.76	True
Aves	Passeriformes		Pipridae		Corapipo gutturalis	0.861809	0.76	True
Aves	Passeriformes		Pipridae		Corapipo leucorrhoa	0.861809	0.76	True
Aves	Passeriformes		Cotingidae	Cotinginae	Cotinga cayana	0.861809	0.76	True
Aves	Passeriformes		Cotingidae	Cotinginae	Cotinga maynana	0.861809	0.76	True
Aves	Passeriformes		Pipridae		Cryptopipo holochlora	0.861809	0.76	True
Aves	Passeriformes		Cotingidae	Phytotominae	Doliornis sclateri	0.861809	0.76	True
Aves	Coraciiformes		Coraciidae		Eurystomus glaucurus	0.861809	0.76	True
Aves	Coraciiformes		Coraciidae		Eurystomus gularis	0.861809	0.76	True
Aves	Coraciiformes		Coraciidae		Eurystomus orientalis	0.861809	0.76	True
Aves	Passeriformes		Cotingidae	Cotinginae	Gymnoderus foetidus	0.861809	0.76	True
Aves	Passeriformes		Cotingidae	Cotinginae	Haematoderus militaris	0.861809	0.76	True
Aves	Passeriformes		Pipridae		Heterocercus flavivertex	0.861809	0.76	True
Aves	Passeriformes		Pipridae		Heterocercus linteatus	0.861809	0.76	True
Aves	Passeriformes		Pipridae		Ilicura militaris	0.861809	0.76	True
Aves	Passeriformes		Cotingidae	Tityrinae	Iodopleura fusca	0.861809	0.76	True
Aves	Passeriformes		Cotingidae	Tityrinae	Iodopleura isabellae	0.861809	0.76	True
Aves	Passeriformes		Cotingidae	Tityrinae	Laniisoma elegans	0.861809	0.76	True
Aves	Passeriformes		Pipridae		Lepidothrix coeruleocapilla	0.861809	0.76	True
Aves	Passeriformes		Pipridae		Lepidothrix coronata	0.861809	0.76	True
Aves	Passeriformes		Pipridae		Lepidothrix iris	0.861809	0.76	True
Aves	Passeriformes		Pipridae		Lepidothrix nattereri	0.861809	0.76	True
Aves	Passeriformes		Pipridae		Lepidothrix serena	0.861809	0.76	True
Aves	Passeriformes		Pipridae		Lepidothrix suavissima	0.861809	0.76	True
Aves	Passeriformes		Cotingidae	Cotinginae	Lipaugus fuscocinereus	0.861809	0.76	True
Aves	Passeriformes		Cotingidae	Cotinginae	Lipaugus streptophorus	0.861809	0.76	True
Aves	Passeriformes		Cotingidae	Cotinginae	Lipaugus unirufus	0.861809	0.76	True
Aves	Passeriformes		Cotingidae	Cotinginae	Lipaugus vociferans	0.861809	0.76	True
Aves	Passeriformes		Pipridae		Machaeropterus deliciosus	0.861809	0.76	True
Aves	Passeriformes		Pipridae		Machaeropterus pyrocephalus	0.861809	0.76	True
Aves	Passeriformes		Pipridae		Machaeropterus regulus	0.861809	0.76	True
Aves	Passeriformes		Pipridae		Manacus aurantiacus	0.861809	0.76	True
Aves	Passeriformes		Pipridae		Manacus candei	0.861809	0.76	True
Aves	Passeriformes		Pipridae		Manacus manacus	0.861809	0.76	True
Aves	Passeriformes		Pipridae		Manacus vitellinus	0.861809	0.76	True
Aves	Passeriformes		Pipridae		Masius chrysopterus	0.861809	0.76	True
Aves	Passeriformes		Pipridae		Neopelma aurifrons	0.861809	0.76	True
Aves	Passeriformes		Pipridae		Neopelma chrysocephalum	0.861809	0.76	True
Aves	Passeriformes		Pipridae		Neopelma pallescens	0.861809	0.76	True
Aves	Passeriformes		Pipridae		Neopelma sulphureiventer	0.861809	0.76	True
Aves	Bucerotiformes		Bucerotidae		Ocyceros gingalensis	0.861809	0.76	True
Aves	Passeriformes		Cotingidae	Rupicolinae	Oxyruncus cristatus	0.861809	0.76	True
Aves	Bucerotiformes		Bucerotidae		Penelopides manillae	0.861809	0.76	True
Aves	Bucerotiformes		Bucerotidae		Penelopides panini	0.861809	0.76	True
Aves	Passeriformes		Cotingidae	Cotinginae	Perissocephalus tricolor	0.861809	0.76	True
Aves	Passeriformes		Cotingidae	Rupicolinae	Phoenicircus nigricollis	0.861809	0.76	True
Aves	Bucerotiformes		Phoeniculidae		Phoeniculus damarensis	0.861809	0.76	True
Aves	Bucerotiformes		Phoeniculidae		Phoeniculus purpureus	0.861809	0.76	True
Aves	Passeriformes		Cotingidae	Phytotominae	Phytotoma rara	0.861809	0.76	True
Aves	Passeriformes		Cotingidae	Phytotominae	Phytotoma rutila	0.861809	0.76	True
Aves	Passeriformes		Pipridae		Pipra aureola	0.861809	0.76	True
Aves	Passeriformes		Pipridae		Pipra erythrocephala	0.861809	0.76	True
Aves	Passeriformes		Pipridae		Pipra fasciicauda	0.861809	0.76	True
Aves	Passeriformes		Pipridae		Pipra filicauda	0.861809	0.76	True
Aves	Passeriformes		Pipridae		Pipra mentalis	0.861809	0.76	True
Aves	Passeriformes		Pipridae		Pipra pipra	0.861809	0.76	True
Aves	Passeriformes		Pipridae		Pipra rubrocapilla	0.861809	0.76	True
Aves	Passeriformes		Cotingidae	Rupicolinae	Pipreola arcuata	0.861809	0.76	True
Aves	Passeriformes		Cotingidae	Rupicolinae	Pipreola chlorolepidota	0.861809	0.76	True
Aves	Passeriformes		Cotingidae	Rupicolinae	Pipreola frontalis	0.861809	0.76	True
Aves	Passeriformes		Cotingidae	Rupicolinae	Pipreola intermedia	0.861809	0.76	True
Aves	Passeriformes		Cotingidae	Rupicolinae	Pipreola pulchra	0.861809	0.76	True
Aves	Passeriformes		Cotingidae	Rupicolinae	Pipreola whitelyi	0.861809	0.76	True
Aves	Passeriformes		Cotingidae		Piprites chloris	0.861809	0.76	True
Aves	Passeriformes		Cotingidae		Piprites pileata	0.861809	0.76	True
Aves	Passeriformes		Cotingidae	Cotinginae	Porphyrolaema porphyrolaema	0.861809	0.76	True
Aves	Passeriformes		Cotingidae	Cotinginae	Procnias albus	0.861809	0.76	True
Aves	Passeriformes		Cotingidae	Cotinginae	Procnias nudicollis	0.861809	0.76	True
Aves	Passeriformes		Cotingidae	Cotinginae	Pyroderus scutatus	0.861809	0.76	True
Aves	Passeriformes		Cotingidae	Cotinginae	Querula purpurata	0.861809	0.76	True
Aves	Bucerotiformes		Phoeniculidae		Rhinopomastus cyanomelas	0.861809	0.76	True
Aves	Bucerotiformes		Bucerotidae		Rhyticeros plicatus	0.861809	0.76	True
Aves	Bucerotiformes		Bucerotidae		Rhyticeros subruficollis	0.861809	0.76	True
Aves	Bucerotiformes		Bucerotidae		Rhyticeros undulatus	0.861809	0.76	True
Aves	Passeriformes		Cotingidae	Rupicolinae	Rupicola peruviana	0.861809	0.76	True
Aves	Passeriformes		Cotingidae	Rupicolinae	Rupicola rupicola	0.861809	0.76	True
Aves	Passeriformes		Sapayoaidae		Sapayoa aenigma	0.861809	0.76	True
Aves	Passeriformes		Cotingidae	Tityrinae	Schiffornis major	0.861809	0.76	True
Aves	Passeriformes		Cotingidae	Tityrinae	Schiffornis turdina	0.861809	0.76	True
Aves	Passeriformes		Cotingidae	Tityrinae	Schiffornis virescens	0.861809	0.76	True
Aves	Passeriformes		Cotingidae	Cotinginae	Snowornis cryptolophus	0.861809	0.76	True
Aves	Passeriformes		Cotingidae	Cotinginae	Snowornis subalaris	0.861809	0.76	True
Aves	Passeriformes		Cotingidae	Cotinginae	Tijuca atra	0.861809	0.76	True
Aves	Bucerotiformes		Bucerotidae		Tockus alboterminatus	0.861809	0.76	True
Aves	Bucerotiformes		Bucerotidae		Tockus camurus	0.861809	0.76	True
Aves	Bucerotiformes		Bucerotidae		Tockus deckeni	0.861809	0.76	True
Aves	Bucerotiformes		Bucerotidae		Tockus erythrorhynchus	0.861809	0.76	True
Aves	Bucerotiformes		Bucerotidae		Tockus fasciatus	0.861809	0.76	True
Aves	Bucerotiformes		Bucerotidae		Tockus flavirostris	0.861809	0.76	True
Aves	Bucerotiformes		Bucerotidae		Tockus jacksoni	0.861809	0.76	True
Aves	Bucerotiformes		Bucerotidae		Tockus leucomelas	0.861809	0.76	True
Aves	Bucerotiformes		Bucerotidae		Tockus monteiri	0.861809	0.76	True
Aves	Bucerotiformes		Bucerotidae		Tockus nasutus	0.861809	0.76	True
Aves	Bucerotiformes		Bucerotidae		Tockus ruahae	0.861809	0.76	True
Aves	Bucerotiformes		Bucerotidae		Tropicranus albocristatus	0.861809	0.76	True
Aves	Passeriformes		Pipridae		Tyranneutes stolzmanni	0.861809	0.76	True
Aves	Passeriformes		Pipridae		Tyranneutes virescens	0.861809	0.76	True
Aves	Bucerotiformes		Upupidae		Upupa epops	0.861809	0.76	True
Aves	Coraciiformes		Brachypteraciidae		Uratelornis chimaera	0.861809	0.76	True
Aves	Passeriformes		Pipridae		Xenopipo atronitens	0.861809	0.76	True
Aves	Passeriformes		Pipridae		Xenopipo unicolor	0.861809	0.76	True
Aves	Passeriformes		Pipridae		Xenopipo uniformis	0.861809	0.76	True
Aves	Passeriformes		Cotingidae	Cotinginae	Xipholena atropurpurea	0.861809	0.76	True
Aves	Passeriformes		Cotingidae	Cotinginae	Xipholena punicea	0.861809	0.76	True
Aves	Passeriformes		Cotingidae	Phytotominae	Zaratornis stresemanni	0.861809	0.76	True
Aves	Passeriformes		Phylloscopidae		Abrornis chloronotus	0.85963	0.76	True
Aves	Passeriformes		Phylloscopidae		Abrornis forresti	0.85963	0.76	True
Aves	Passeriformes		Phylloscopidae		Abrornis humei	0.85963	0.76	True
Aves	Passeriformes		Phylloscopidae		Abrornis inornata	0.85963	0.76	True
Aves	Passeriformes		Phylloscopidae		Abrornis kansuensis	0.85963	0.76	True
Aves	Passeriformes		Phylloscopidae		Abrornis maculipennis	0.85963	0.76	True
Aves	Passeriformes		Phylloscopidae		Abrornis proregulus	0.85963	0.76	True
Aves	Passeriformes		Phylloscopidae		Abrornis yunnanensis	0.85963	0.76	True
Aves	Passeriformes		Remizidae		Auriparus flaviceps	0.85963	0.76	True
Aves	Passeriformes		Troglodytidae		Campylorhynchus albobrunneus	0.85963	0.76	True
Aves	Passeriformes		Troglodytidae		Campylorhynchus brunneicapillus	0.85963	0.76	True
Aves	Passeriformes		Troglodytidae		Campylorhynchus chiapensis	0.85963	0.76	True
Aves	Passeriformes		Troglodytidae		Campylorhynchus fasciatus	0.85963	0.76	True
Aves	Passeriformes		Troglodytidae		Campylorhynchus griseus	0.85963	0.76	True
Aves	Passeriformes		Troglodytidae		Campylorhynchus gularis	0.85963	0.76	True
Aves	Passeriformes		Troglodytidae		Campylorhynchus jocosus	0.85963	0.76	True
Aves	Passeriformes		Troglodytidae		Campylorhynchus megalopterus	0.85963	0.76	True
Aves	Passeriformes		Troglodytidae		Campylorhynchus nuchalis	0.85963	0.76	True
Aves	Passeriformes		Troglodytidae		Campylorhynchus rufinucha	0.85963	0.76	True
Aves	Passeriformes		Troglodytidae		Campylorhynchus turdinus	0.85963	0.76	True
Aves	Passeriformes		Troglodytidae		Campylorhynchus yucatanicus	0.85963	0.76	True
Aves	Passeriformes		Troglodytidae		Campylorhynchus zonatus	0.85963	0.76	True
Aves	Passeriformes		Troglodytidae		Cantorchilus superciliaris	0.85963	0.76	True
Aves	Passeriformes		Troglodytidae		Catherpes mexicanus	0.85963	0.76	True
Aves	Passeriformes		Troglodytidae		Catherpes sumichrasti	0.85963	0.76	True
Aves	Passeriformes		Certhiidae		Certhia americana	0.85963	0.76	True
Aves	Passeriformes		Certhiidae		Certhia brachydactyla	0.85963	0.76	True
Aves	Passeriformes		Certhiidae		Certhia discolor	0.85963	0.76	True
Aves	Passeriformes		Certhiidae		Certhia familiaris	0.85963	0.76	True
Aves	Passeriformes		Certhiidae		Certhia himalayana	0.85963	0.76	True
Aves	Passeriformes		Certhiidae		Certhia hodgsoni	0.85963	0.76	True
Aves	Passeriformes		Certhiidae		Certhia manipurensis	0.85963	0.76	True
Aves	Passeriformes		Certhiidae		Certhia nipalensis	0.85963	0.76	True
Aves	Passeriformes		Certhiidae		Certhia tianquanensis	0.85963	0.76	True
Aves	Passeriformes		Troglodytidae		Cinnycerthia peruana	0.85963	0.76	True
Aves	Passeriformes		Troglodytidae		Cistothorus palustris	0.85963	0.76	True
Aves	Passeriformes		Troglodytidae		Cistothorus platensis	0.85963	0.76	True
Aves	Passeriformes		Troglodytidae		Cyphorhinus arada	0.85963	0.76	True
Aves	Passeriformes		Troglodytidae		Henicorhina leucophrys	0.85963	0.76	True
Aves	Passeriformes		Troglodytidae		Henicorhina leucoptera	0.85963	0.76	True
Aves	Passeriformes		Troglodytidae		Henicorhina leucosticta	0.85963	0.76	True
Aves	Passeriformes		Cettiidae		Horornis acanthizoides	0.85963	0.76	True
Aves	Passeriformes		Cettiidae		Horornis annae	0.85963	0.76	True
Aves	Passeriformes		Cettiidae		Horornis brunnescens	0.85963	0.76	True
Aves	Passeriformes		Cettiidae		Horornis diphone	0.85963	0.76	True
Aves	Passeriformes		Cettiidae		Horornis flavolivaceus	0.85963	0.76	True
Aves	Passeriformes		Cettiidae		Horornis seebohmi	0.85963	0.76	True
Aves	Passeriformes		Polioptilidae		Microbates cinereiventris	0.85963	0.76	True
[truncated: 5,091 more rows]
